# Supplementary material for: Decarboxylation-promoted Pd-catalyzed asymmetric propargylic [3 + 2] annulation for the enantioselective construction of a quaternary stereocenter in 2,3-dihydrofurans
Source: Royal Society of Chemistry journal article supplement (doi:10.1039/c7ob02778h), 2018-01-01

# **Decarboxylation-promoted Pd-catalyzed asymmetric propargylic [3+2] annulation for enantioselective construction of quaternary stereocenter in 2,3-dihydrofurans**

Kun Li, Fu-Lin Zhu, Zhen-Ting Liu, Jing Tong\*, and Xiang-Ping Hu\*

*Dalian Institute of Chemical Physics, Chinese Academy of Sciences, Dalian 116023, China*  
xiangping@dicp.ac.cn

## **Supporting Information**

|                                                                                                                                                 |            |
|-------------------------------------------------------------------------------------------------------------------------------------------------|------------|
| <b>General Information.....</b>                                                                                                                 | <b>S2</b>  |
| <b>General Procedure for Pd-Catalyzed Asymmetric [3+2] Cycloaddition of Tertiary Propargylic Esters with <math>\beta</math>-Ketoesters.....</b> | <b>S2</b>  |
| <b>Synthetic Application of Cycloadduct 3aa.....</b>                                                                                            | <b>S24</b> |
| <b>References.....</b>                                                                                                                          | <b>S25</b> |
| <b>NMR Spectra.....</b>                                                                                                                         | <b>S26</b> |

## General Information

All reactions were carried out under a nitrogen atmosphere. Solvents were purified by standard procedure before use. Commercial reagents were used without further purification. Flash chromatography was performed on silica gel 60 (40-63 $\mu$ m, 60Å). Thin layer chromatography (TLC) was performed on glass plates coated with silica gel 60 with F254 indicator. Proton nuclear magnetic resonance ( $^1\text{H}$  NMR) spectra were recorded on a Bruker 400 MHz spectrometer. Chemical shifts for protons are reported in parts per million downfield from tetramethylsilane and are referenced to residual protium in the NMR solvent. Carbon nuclear magnetic resonance spectra were recorded on a Bruker 100 MHz spectrometer. Chemical shifts for carbon are reported in parts per million downfield from tetramethylsilane and are referenced to the carbon resonances of the solvent ( $\text{CDCl}_3 = \delta$  77.07). Data are represented as follows: chemical shift, multiplicity (br = broad, s = singlet, d = doublet, t = triplet, q = quartet, m = multiplet), coupling constants in Hertz (Hz), integration. Enantiomeric ratios were determined by chiral HPLC with hexane and *i*-PrOH as solvents. Optical rotations were recorded on a JASCO P-1020 polarimeter. Tertiary propargylic esters **1**,<sup>1</sup>  $\beta$ -ketoesters **2**<sup>2</sup> and ligand **La-d**<sup>3</sup> were prepared following the method from the literature.

## General Procedure for Pd-Catalyzed Asymmetric [3+2] Cycloaddition of $\beta$ -Ketoesters with Tertiary Propargylic Esters

A solution of  $\text{Pd}_2(\text{dba})_3 \cdot \text{CHCl}_3$  (7.8 mg, 0.0075 mmol) and (*R*<sub>c</sub>,*S*<sub>p</sub>)-**La** (9.2 mg, 0.0165 mmol) in 1 mL of anhydrous toluene placed in an oven-dried Schlenk flask was stirred at room temperature under a nitrogen atmosphere for 1 h. A solution of  $\beta$ -ketoesters **2** (0.3 mmol), propargylic esters **1** (0.3 mmol) and  $\text{Cs}_2\text{CO}_3$  (117.3 mg, 0.36 mmol) in 2 mL of anhydrous toluene was added. The mixture was stirred at 60 °C for 24 h. The reaction mixture was purified by silica gel chromatography to afford dihydrofuran products **3**.

**(S)-Methyl 5-methyl-4-methylene-2,5-diphenyl-4,5-dihydrofuran-3-carboxylate (3aa).** Pale

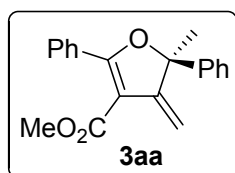

yellow oil was obtained in 90% yield after purification with column chromatography on silica gel (hexanes/ethyl acetate, 100/1). 96% ee was determined by chiral HPLC (Chiralpak AD-H, *n*-hexane/*i*-PrOH = 90/10, 0.8 mL min<sup>-1</sup>, 254 nm, 40 °C): *t*<sub>R</sub> (major) = 8.9 min, *t*<sub>R</sub> (minor) = 6.0 min.  $[\alpha]_{\text{D}}^{27} =$

+13.2 (*c* = 1.11,  $\text{CH}_2\text{Cl}_2$ ).  $^1\text{H}$  NMR (400 MHz,  $\text{DMSO-d}_6$ )  $\delta$  7.74-7.72 (m, 2H), 7.55-7.31 (m, 8H),

5.53 (s, 1H), 4.84 (s, 1H), 3.63 (s, 3H), 1.86 (s, 3H);  $^{13}\text{C}$  NMR (101 MHz, DMSO- $d_6$ )  $\delta$  168.5, 164.5, 152.6, 143.5, 131.5, 130.2, 129.4, 129.0, 128.5, 128.4, 125.1, 105.6, 103.0, 91.4, 51.5, 27.7; HRMS (ESI):  $m/z$  calcd for  $\text{C}_{20}\text{H}_{19}\text{O}_3$  [M+H] 307.1334, found 307.1332.

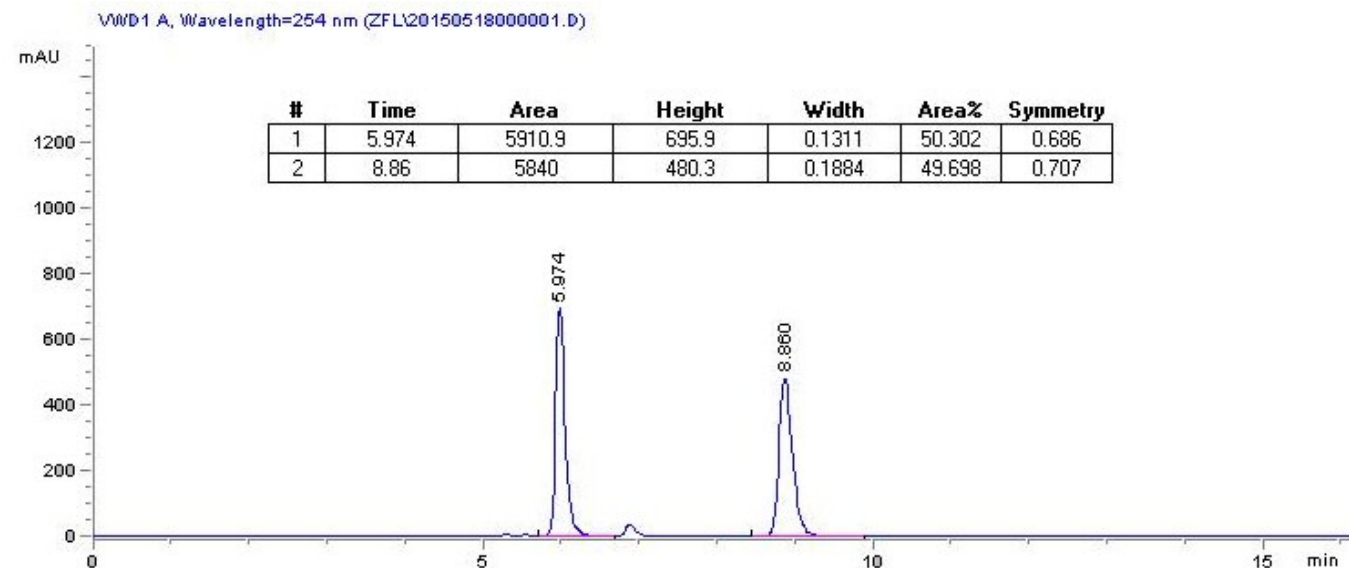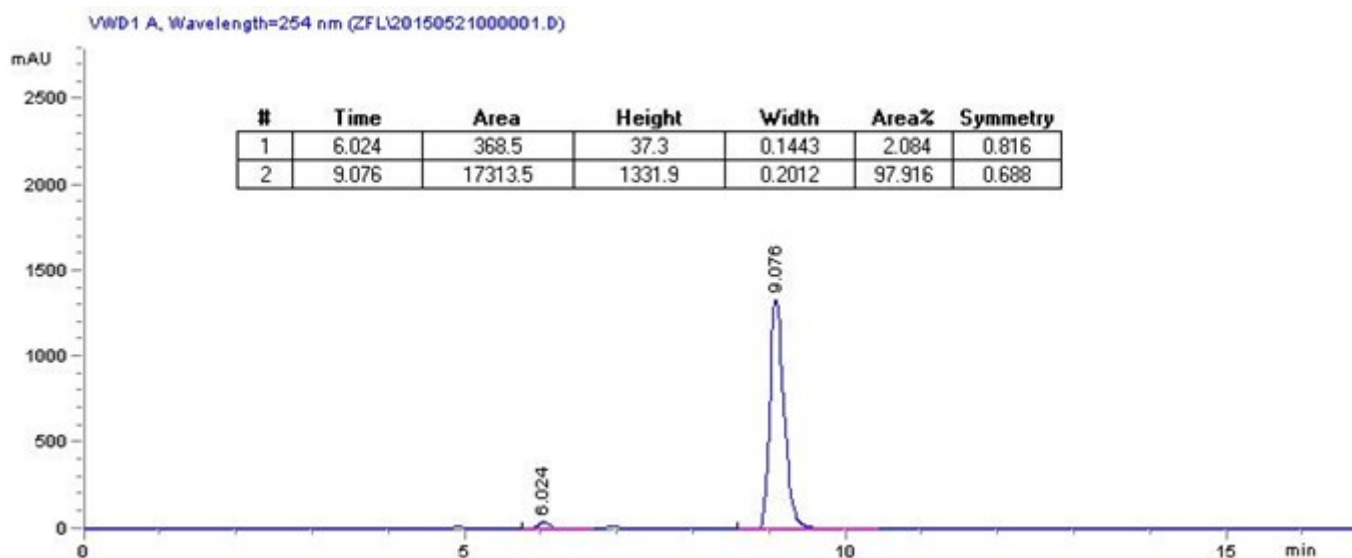

**(S)-Methyl 5-methyl-4-methylene-5-phenyl-2-(p-tolyl)-4,5-dihydrofuran-3-carboxylate (3ab).**

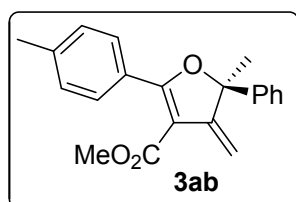

Yellow oil was obtained in 92% yield after purification with column chromatography on silica gel (hexanes/ethyl acetate, 70/1). 90% ee was determined by chiral HPLC (Chiralpak AD-H, *n*-hexane/*i*-PrOH = 90/10, 0.8 mL min<sup>-1</sup>, 254 nm, 40 °C):  $t_R$  (major) = 16.9 min,  $t_R$  (minor) = 7.5 min.

$[\alpha]_D^{23} = -14.3$  ( $c = 1.10$ ,  $\text{CH}_2\text{Cl}_2$ ).  $^1\text{H}$  NMR (400 MHz, DMSO- $d_6$ )  $\delta$  7.65-7.63 (m, 2H), 7.50-7.28 (m, 7H), 5.50 (s, 1H), 4.82 (s, 1H), 3.63 (s, 3H), 2.37 (s, 3H), 1.85 (s, 3H);  $^{13}\text{C}$  NMR (101 MHz, DMSO- $d_6$ )  $\delta$  168.6, 164.6, 152.8, 143.6, 141.5, 129.4, 129.0, 129.0, 128.3, 127.3, 125.1, 105.1,

102.6, 91.1, 51.4, 27.7, 21.6; HRMS (ESI):  $m/z$  calcd for  $C_{21}H_{21}O_3$   $[M+H]$  321.1491, found 321.1488.

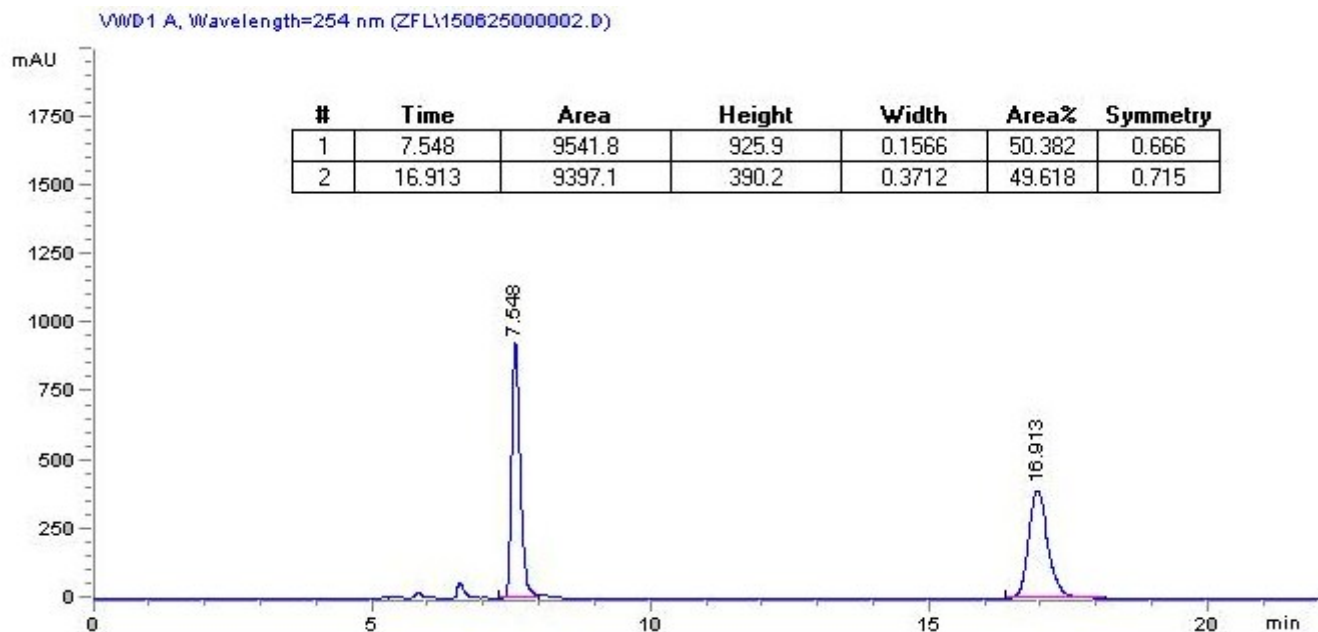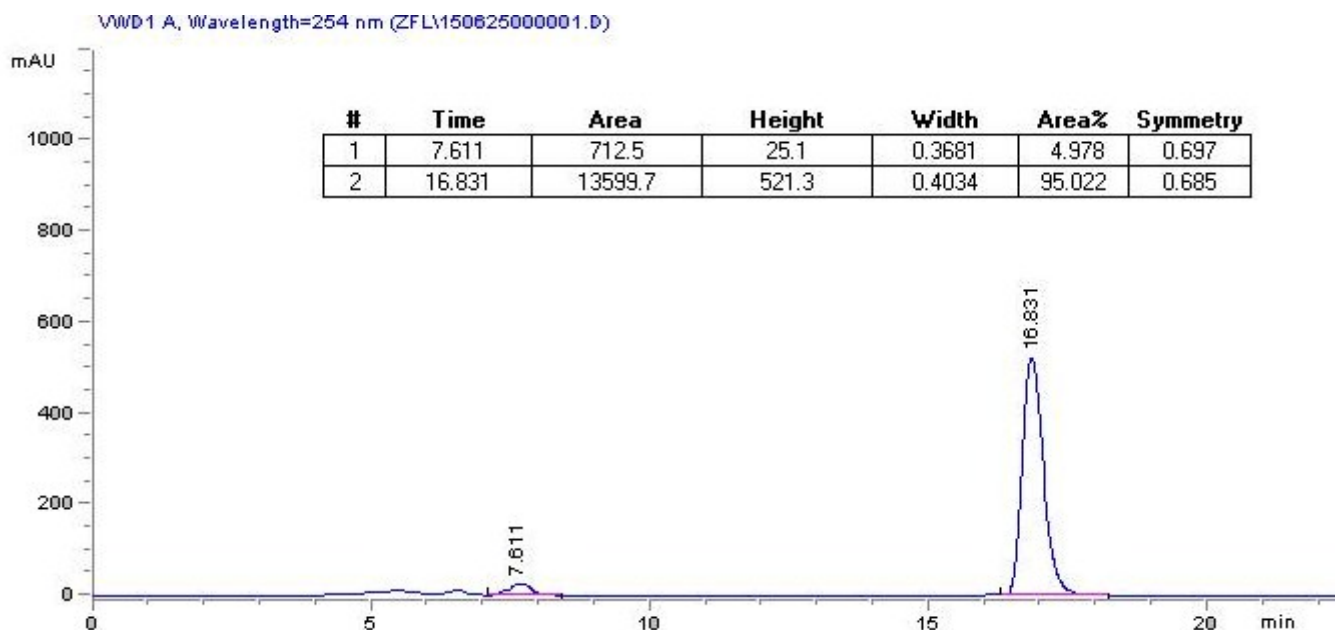

**(S)-Methyl 2-(4-methoxyphenyl)-5-methyl-4-methylene-5-phenyl-4,5-dihydrofuran-3-carboxylate (3ac).**

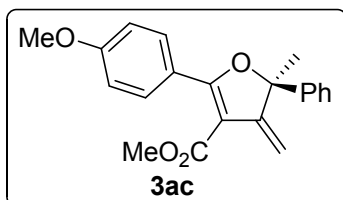

Yellow oil was obtained in 74% yield after purification with column chromatography on silica gel (hexanes/ethyl acetate, 50/1). 97% ee was determined by chiral HPLC (Chiralpak AD-H, *n*-hexane/*i*-PrOH = 80/20, 0.8 mL min<sup>-1</sup>, 254 nm, 40 °C):  $t_R$  (major) =

17.5 min,  $t_R$  (minor) = 7.5 min.  $[\alpha]_D^{29} = +10.9$  ( $c = 1.00$ ,  $CH_2Cl_2$ ). <sup>1</sup>H NMR (400 MHz, DMSO-*d*<sub>6</sub>)  $\delta$  7.75-7.73 (m, 2H), 7.49-7.33 (m, 5H), 7.04-7.02 (m, 2H), 5.46 (s, 1H), 4.79 (s, 1H), 3.83 (s, 3H), 3.65 (s, 3H), 1.84 (s, 3H); <sup>13</sup>C NMR (101 MHz, DMSO-*d*<sub>6</sub>)  $\delta$  168.4, 164.7, 161.9, 152.8, 143.7,

131.3, 129.0, 128.3, 125.1, 122.2, 113.9, 104.2, 102.3, 90.9, 55.8, 51.4, 27.7; HRMS (ESI):  $m/z$  calcd for  $C_{21}H_{21}O_4$  [M+H] 337.1440, found 337.1438.

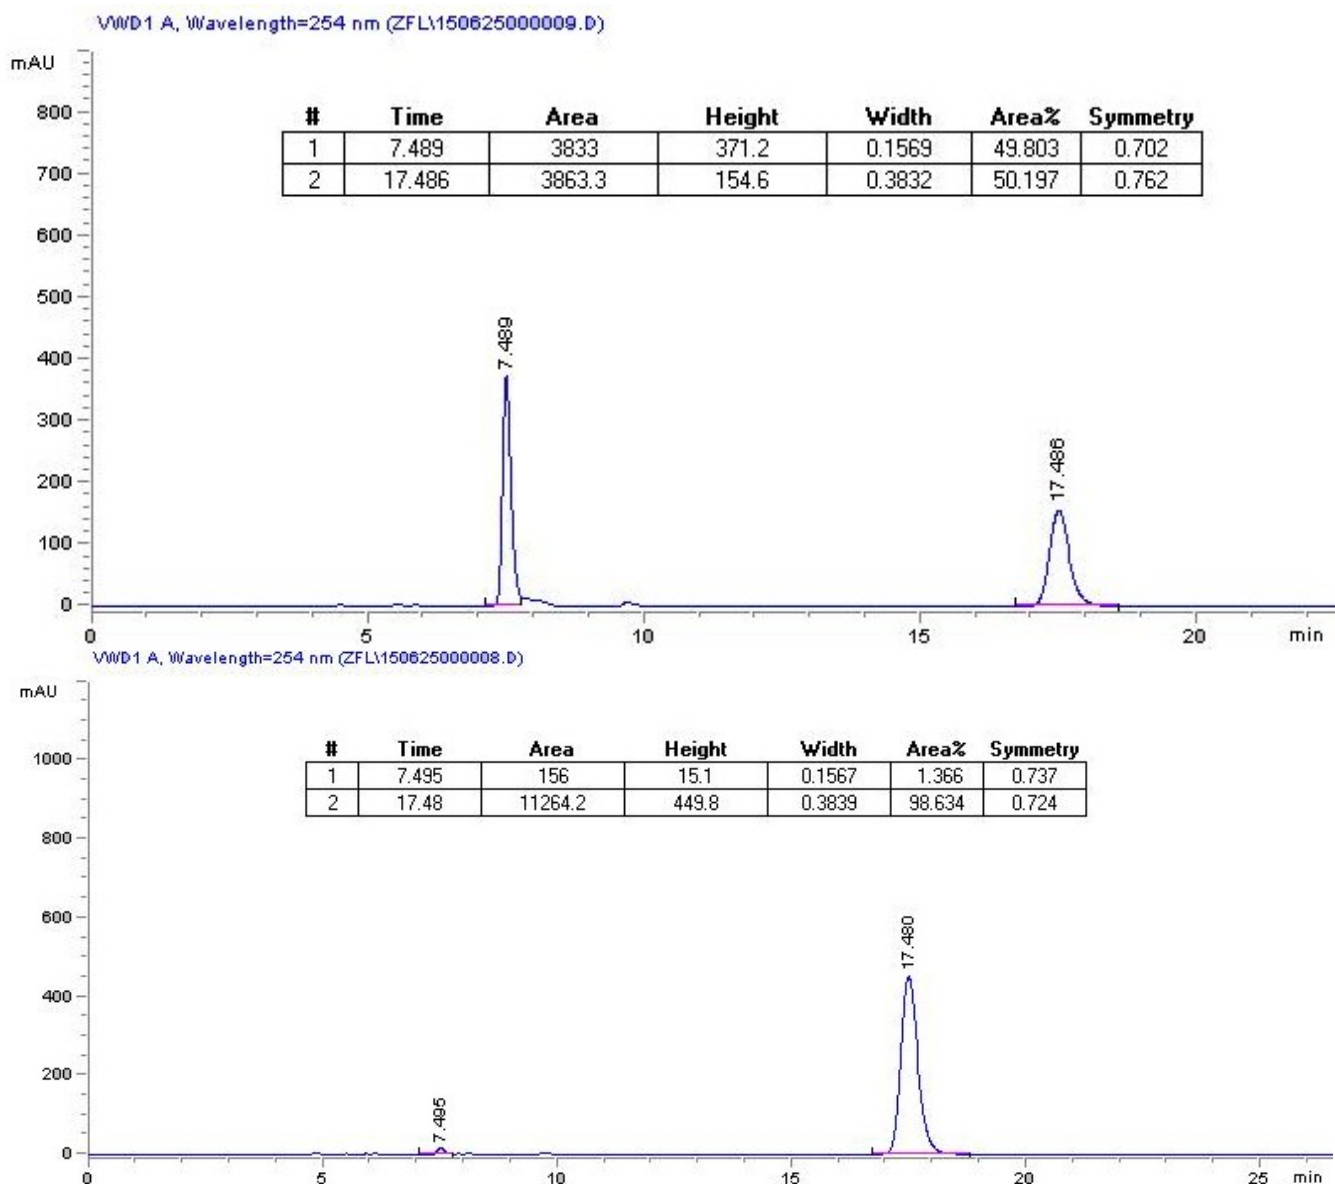

**(S)-Methyl 2-(4-fluorophenyl)-5-methyl-4-methylene-5-phenyl-4,5-dihydrofuran-3-carboxylate (3ad).**

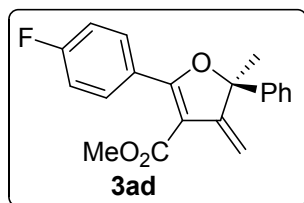

Yellow oil was obtained in 93% yield after purification with column chromatography on silica gel (hexanes/ethyl acetate, 100/1). 96% ee was determined by chiral HPLC (Chiralpak AD-H, *n*-hexane/*i*-PrOH = 90/10, 0.8 mL min<sup>-1</sup>, 254 nm, 40 °C):  $t_R$  (major) = 11.1 min,  $t_R$  (minor) = 6.7 min.  $[\alpha]_D^{26} = -22.6$  ( $c = 1.10$ ,  $CH_2Cl_2$ ). <sup>1</sup>H NMR (400 MHz, DMSO- $d_6$ )  $\delta$  7.83-7.80 (m, 2H), 7.50-7.29 (m, 7H), 5.53 (s, 1H), 4.83 (s, 1H), 3.64 (s, 3H), 1.86 (s, 3H); <sup>13</sup>C NMR (101 MHz, DMSO- $d_6$ )  $\delta$  167.6, 164.4, 163.9 (d,  $J = 249.4$  Hz) 152.5, 143.4, 132.1 (d,  $J = 8.9$  Hz), 129.0, 128.4, 126.6 (d,  $J = 3.2$  Hz), 125.1, 115.6 (d,  $J = 21.9$  Hz), 105.6, 103.2, 91.5, 51.5, 27.7; HRMS

(ESI):  $m/z$  calcd for  $C_{20}H_{18}FO_3$   $[M+H]$  325.1240, found 325.1241.

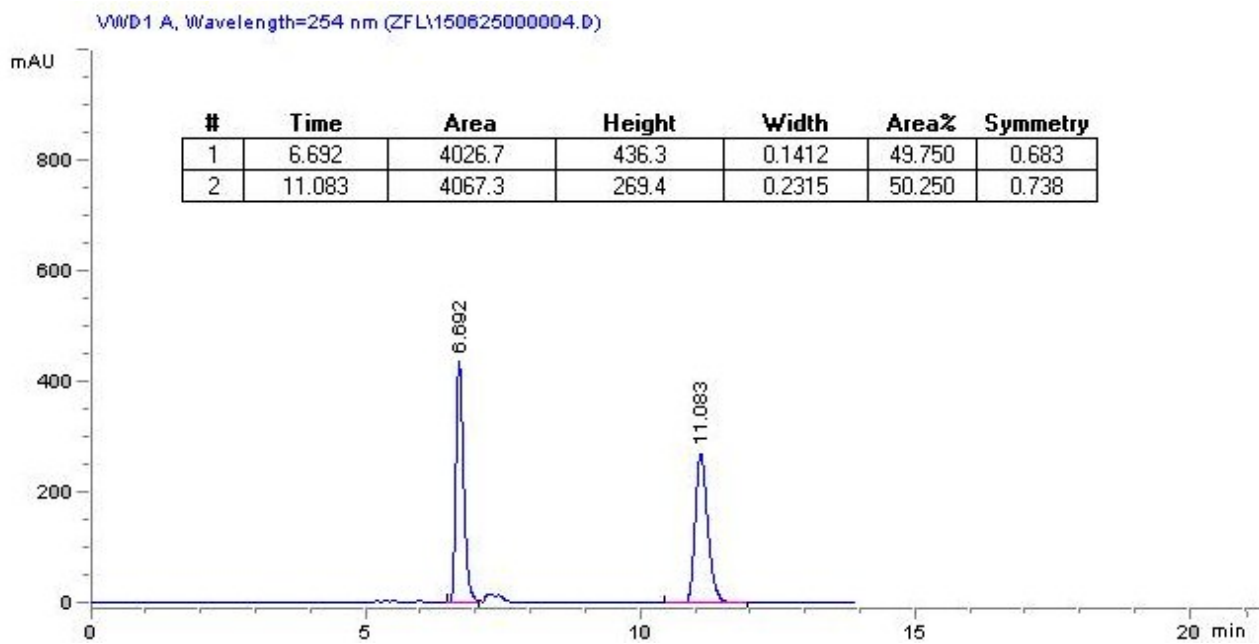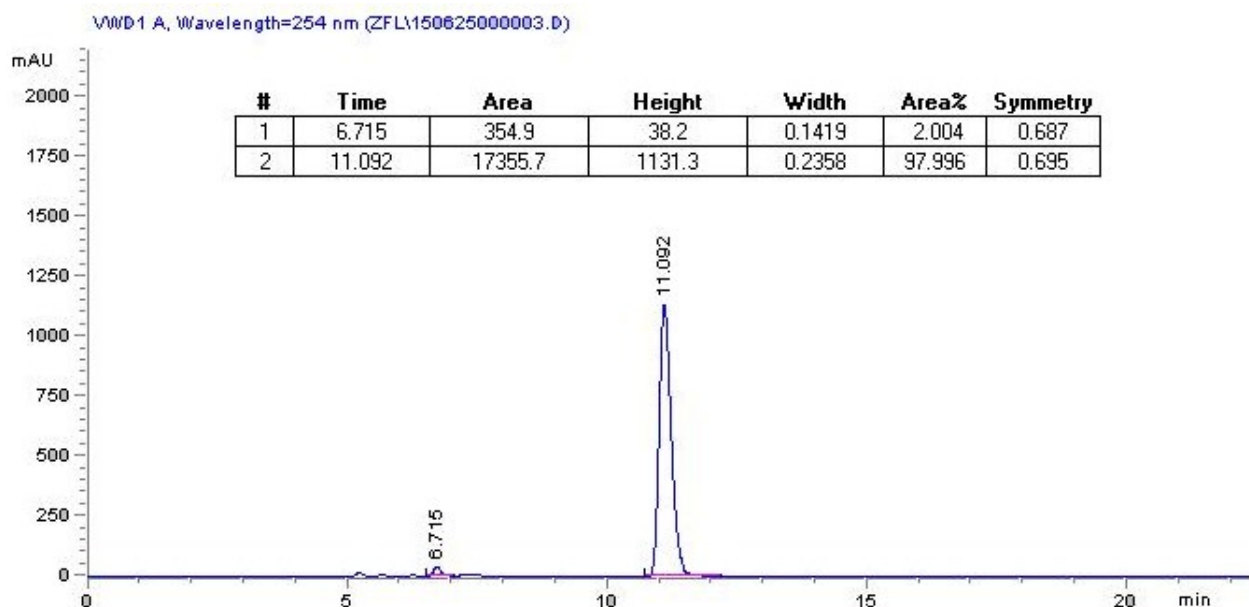

**(S)-Methyl 2-(4-chlorophenyl)-5-methyl-4-methylene-5-phenyl-4,5-dihydrofuran-3-carboxylate (3ae).**

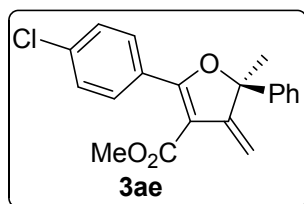

Yellow oil was obtained in 92% yield after purification with column chromatography on silica gel (hexanes/ethyl acetate, 70/1). 94% ee was determined by chiral HPLC (Chiralpak AD-H, *n*-hexane/*i*-PrOH = 90/10, 0.8 mL min<sup>-1</sup>, 254 nm, 40 °C):  $t_R$  (major) = 13.8 min,  $t_R$  (minor) = 6.9 min.  $[\alpha]_D^{27} = -23.9$  ( $c = 0.77$ ,  $CH_2Cl_2$ ). <sup>1</sup>H NMR (400 MHz, DMSO-*d*<sub>6</sub>)  $\delta$  7.77-7.75 (m, 2H), 7.56-7.32 (m, 7H), 5.54 (s, 1H), 4.85 (s, 1H), 3.64 (s, 3H), 1.86 (s, 3H); <sup>13</sup>C NMR (101 MHz, DMSO-*d*<sub>6</sub>)  $\delta$  167.3, 164.3, 152.4, 143.4, 136.2, 131.3, 129.0, 128.9, 128.6, 128.4, 125.1, 106.1, 103.6, 91.6, 51.5, 27.7; HRMS (ESI):  $m/z$  calcd for  $C_{20}H_{18}ClO_3$   $[M+H]$  341.0944, found 341.0944.

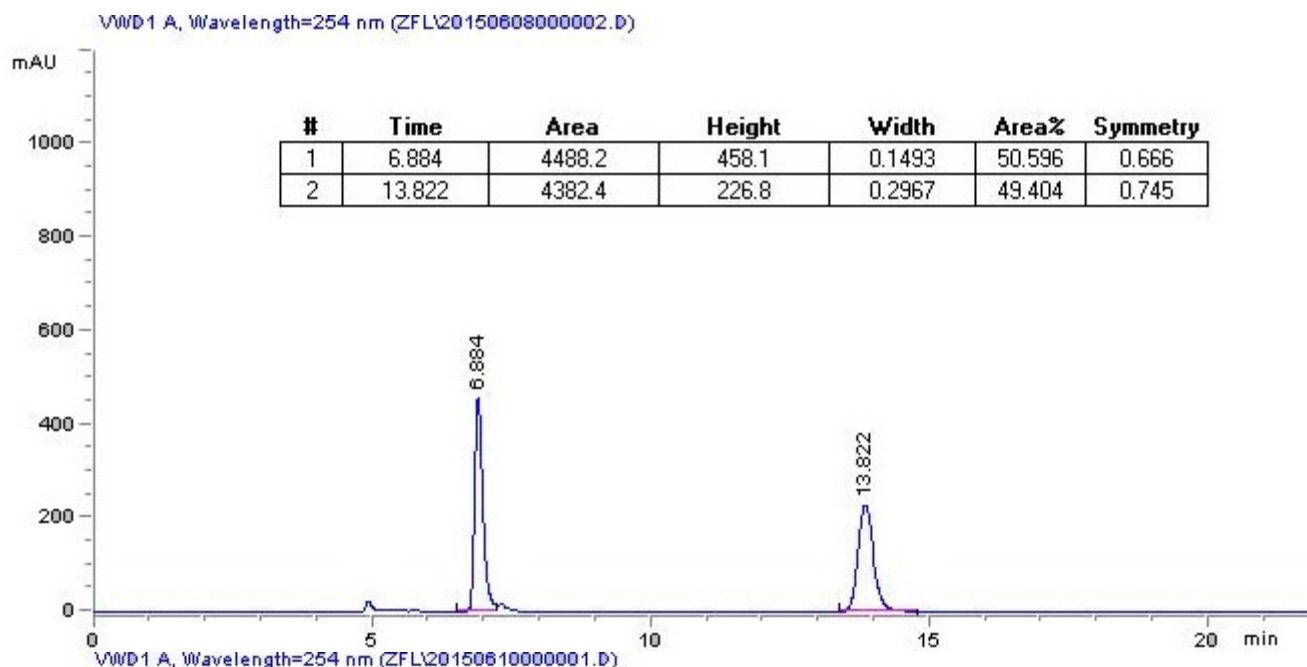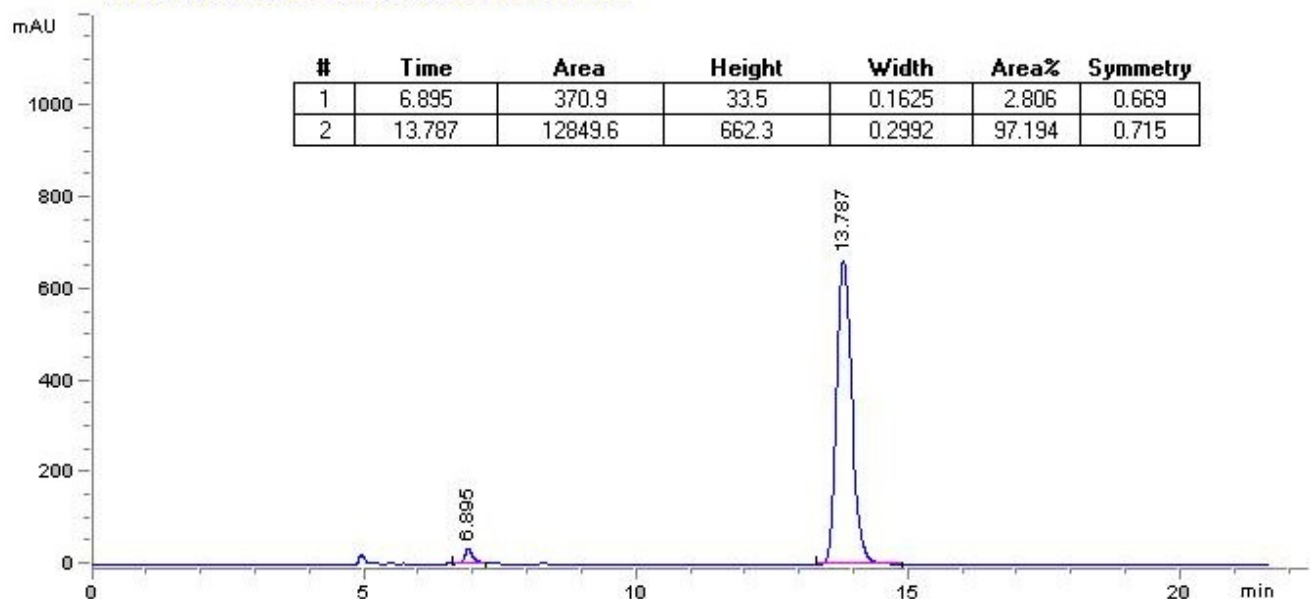

**(S)-Methyl 2-(3-chlorophenyl)-5-methyl-4-methylene-5-phenyl-4,5-dihydrofuran-3-carboxylate (3af)**

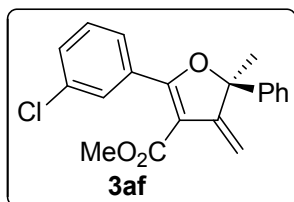

ate (**3af**). Yellow oil was obtained in 90% yield after purification with column chromatography on silica gel (hexanes/ethyl acetate, 70/1). 92% ee was determined by chiral HPLC (Chiralpak AD-H, *n*-hexane/*i*-PrOH = 90/10, 0.8 mL min<sup>-1</sup>, 254 nm, 40 °C): *t<sub>R</sub>* (major) = 7.1 min, *t<sub>R</sub>* (minor) = 6.0 min. [ $\alpha$ ]<sub>D</sub><sup>26</sup> = -36.7 (*c* = 1.07, CH<sub>2</sub>Cl<sub>2</sub>). <sup>1</sup>H NMR (400 MHz, DMSO-*d*<sub>6</sub>)  $\delta$  7.78-7.58 (m, 3H), 7.50-7.33 (m, 6H), 5.56 (s, 1H), 4.84 (s, 1H), 3.64 (s, 3H), 1.86 (s, 3H); <sup>13</sup>C NMR (101 MHz, DMSO-*d*<sub>6</sub>)  $\delta$  166.8, 164.2, 152.2, 143.3, 133.2, 132.2, 131.2, 130.4, 129.1, 129.0, 128.4, 128.1, 125.2, 106.5, 103.9, 91.8, 51.6, 27.6. HRMS (ESI): *m/z* calcd for C<sub>20</sub>H<sub>18</sub>ClO<sub>3</sub> [M+H] 341.0944, found 341.0942.



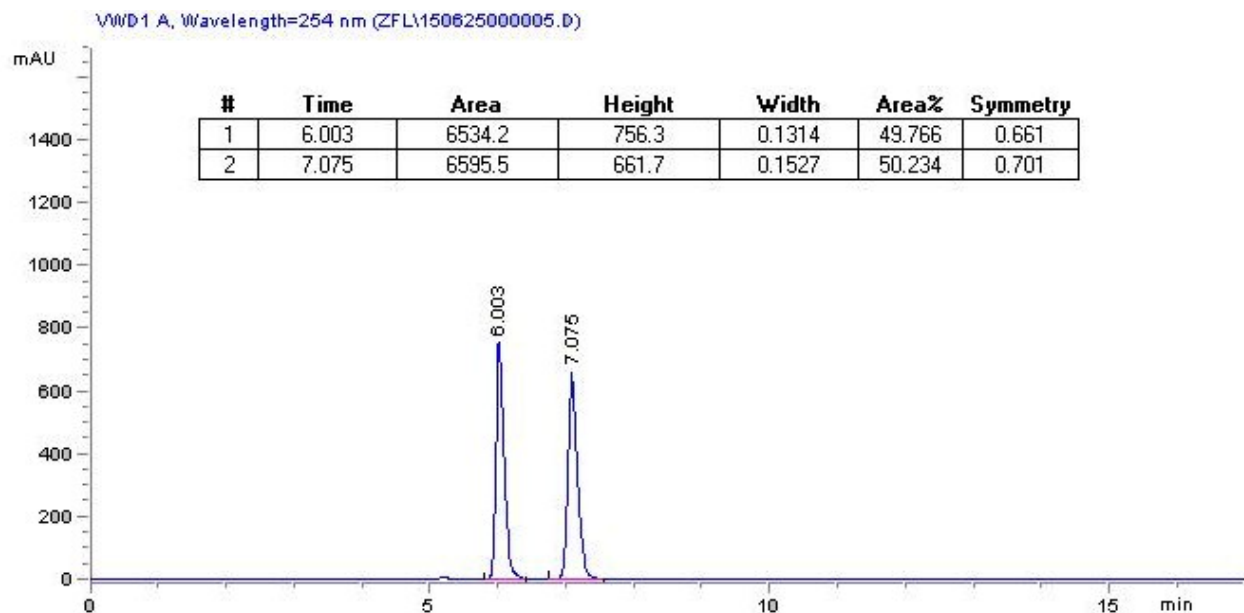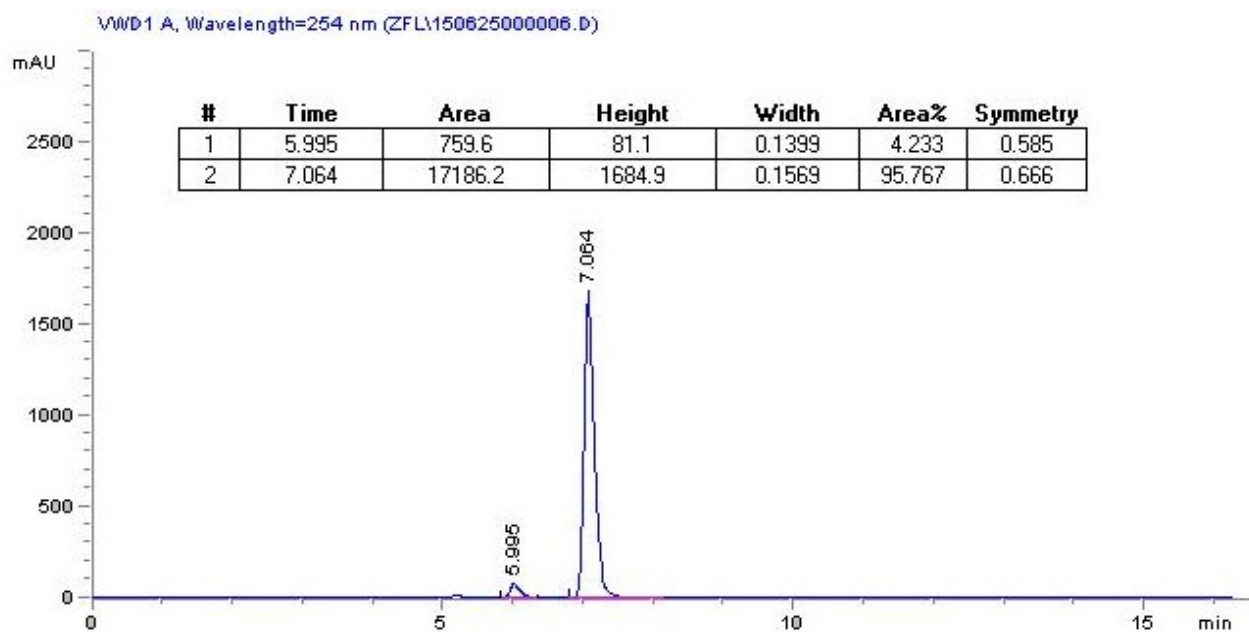

**(S)-Methyl 2-(2-chlorophenyl)-5-methyl-4-methylene-5-phenyl-4,5-dihydrofuran-3-carboxylate (3ag).**

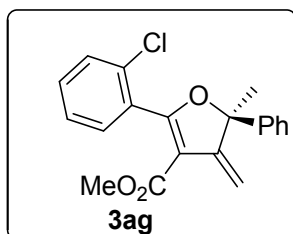

Yellow oil was obtained in 64% yield after purification with column chromatography on silica gel (hexanes/ethyl acetate, 70/1). 85% ee was determined by chiral HPLC (Chiralpak AD-H, *n*-hexane/*i*-PrOH = 95/5, 0.8 mL min<sup>-1</sup>, 254 nm, 40 °C): *t<sub>R</sub>* (major) = 8.2 min, *t<sub>R</sub>* (minor) = 7.1 min. [ $\alpha$ ]<sub>D</sub><sup>29</sup> = -17.4 (*c* = 1.04, CH<sub>2</sub>Cl<sub>2</sub>). <sup>1</sup>H NMR (400 MHz, DMSO-*d*<sub>6</sub>)  $\delta$

7.60-7.33 (m, 9H), 5.61 (s, 1H), 4.81 (s, 1H), 3.51 (s, 3H), 1.89 (s, 3H); <sup>13</sup>C NMR (101 MHz, DMSO-*d*<sub>6</sub>)  $\delta$  167.7, 163.7, 151.7, 142.9, 132.4, 132.1, 131.2, 130.8, 129.9, 128.9, 128.5, 127.5, 125.4, 108.2, 103.5, 92.9, 51.4, 27.6; HRMS (ESI): *m/z* calcd for C<sub>20</sub>H<sub>18</sub>ClO<sub>3</sub> [M+H] 341.0944, found 341.0941.



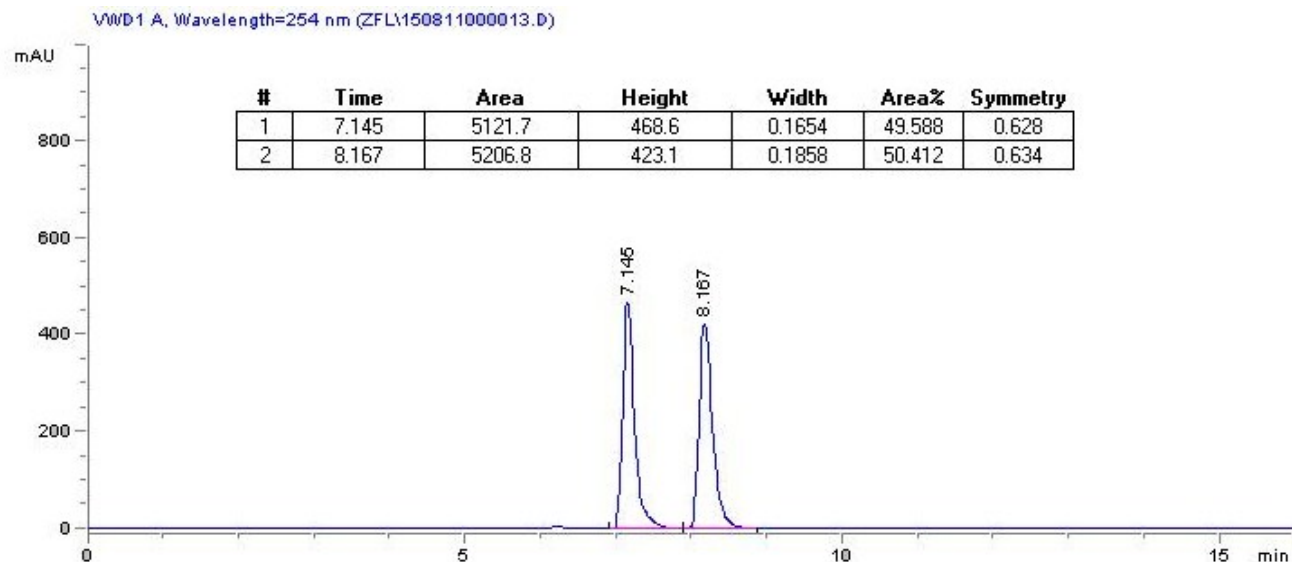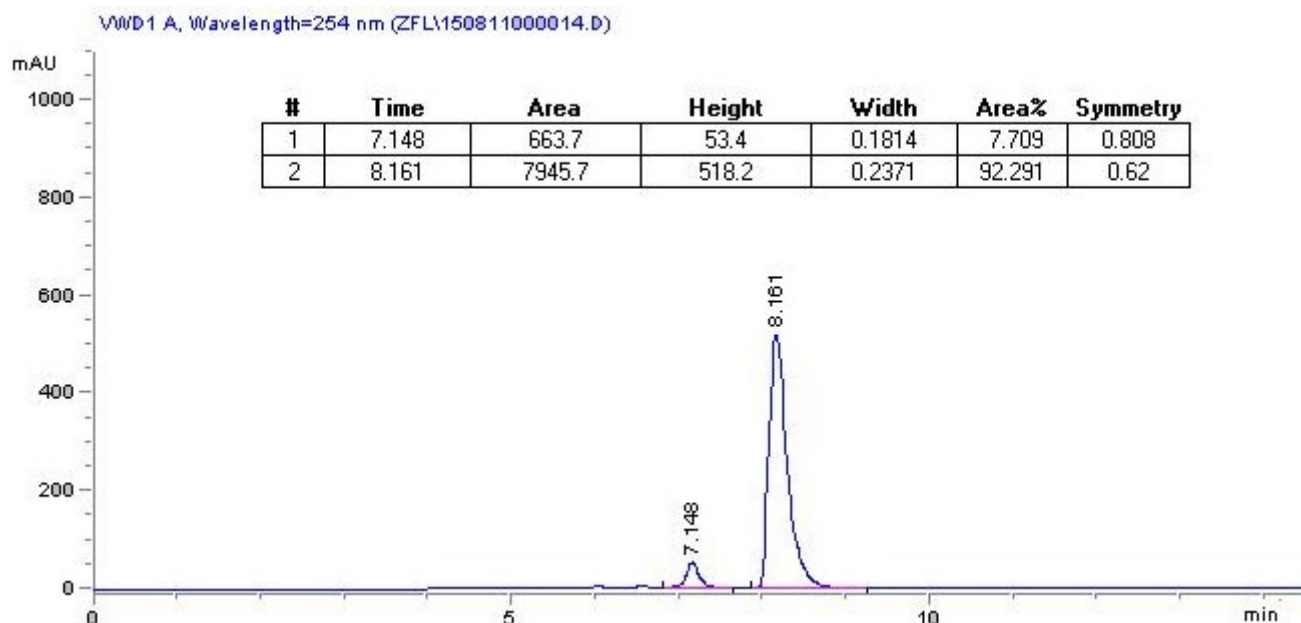

**(S)-Methyl 5-methyl-4-methylene-2-(naphthalen-2-yl)-5-phenyl-4,5-dihydrofuran-3-carboxylate (3ah).**

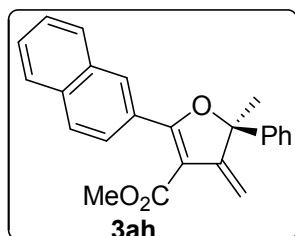

Pale yellow solid was obtained in 92% yield after purification with column chromatography on silica gel (hexanes/ethyl acetate, 50/1). M.p.: 97-98 °C. 95% ee was determined by chiral HPLC (Chiralpak AD-H, *n*-hexane/*i*-PrOH = 80/20, 0.8 mL min<sup>-1</sup>, 254 nm, 40 °C): *t*<sub>R</sub> (major) = 10.3 min, *t*<sub>R</sub> (minor) = 6.9 min. [ $\alpha$ ]<sub>D</sub><sup>24</sup> = 35.4 (*c* 0.95, CH<sub>2</sub>Cl<sub>2</sub>). <sup>1</sup>H NMR (400 MHz, DMSO-*d*<sub>6</sub>)  $\delta$  8.38 (s, 1H), 8.07-7.96 (m, 3H), 7.78 (dd, *J* = 8.6, 1.7 Hz, 1H), 7.63-7.54 (m, 4H), 7.44-7.32 (m, 3H), 5.57 (s, 1H), 4.86 (s, 1H), 3.65 (s, 3H), 1.91 (s, 3H); <sup>13</sup>C NMR (101 MHz, DMSO-*d*<sub>6</sub>)  $\delta$  168.4, 164.5, 152.7, 143.6, 134.3, 132.5, 129.7, 129.3, 129.0, 128.4, 128.3, 128.1, 127.8, 127.6, 127.2, 126.2, 125.2, 106.0, 103.1, 91.5, 51.5, 27.7; HRMS (ESI): *m/z* calcd for C<sub>24</sub>H<sub>21</sub>O<sub>3</sub> [M+H] 357.1491, found 357.1486.

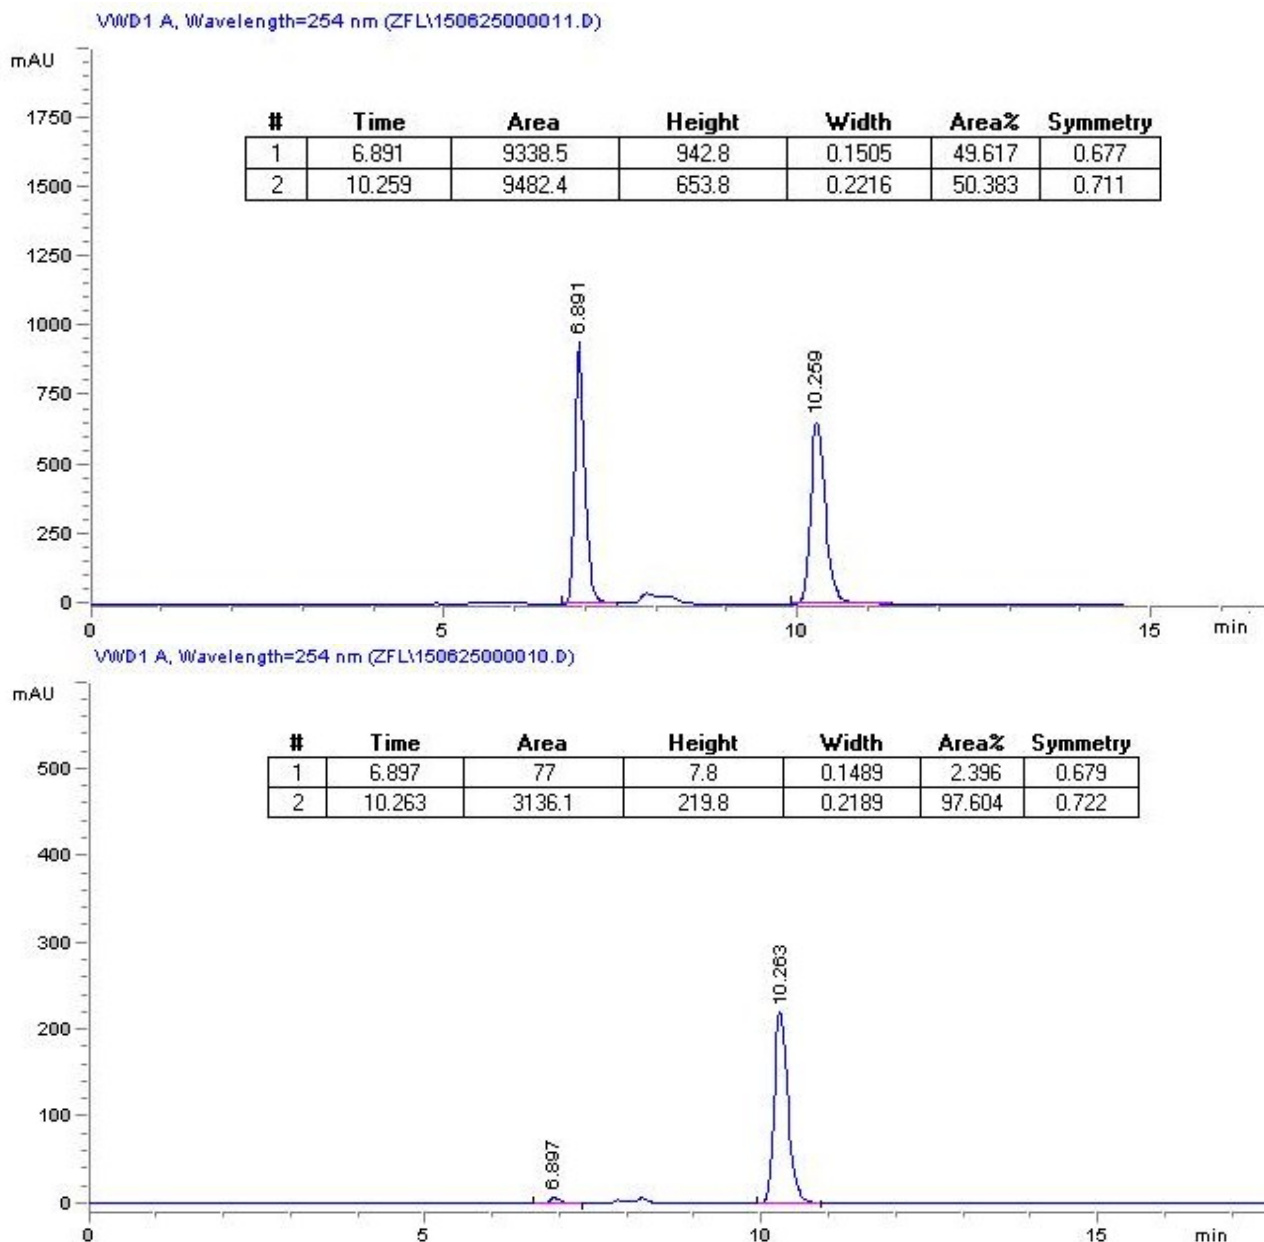

**(S)-Methyl 5-methyl-4-methylene-5-phenyl-2-(thiophen-2-yl)-4,5-dihydrofuran-3-carboxylate (3ai).**

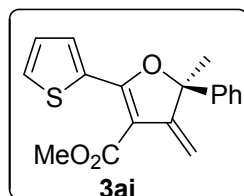

Yellow oil was obtained in 89% yield after purification with column chromatography on silica gel (hexanes/ethyl acetate, 70/1). 97% ee was determined by chiral HPLC (Chiralpak AD-H, *n*-hexane/*i*-PrOH = 80/20, 0.8 mL min<sup>-1</sup>, 254 nm, 40 °C): *t*<sub>R</sub> (major) = 6.9 min, *t*<sub>R</sub> (minor) = 5.7 min. [ $\alpha$ ]<sub>D</sub><sup>24</sup> =

+102.9 (*c* = 1.00, CH<sub>2</sub>Cl<sub>2</sub>). <sup>1</sup>H NMR (400 MHz, DMSO-*d*<sub>6</sub>)  $\delta$  8.17 (dd, *J* = 3.9, 1.2 Hz, 1H), 7.95 (dd, *J* = 5.0, 1.2 Hz, 1H), 7.47-7.24 (m, 7H), 5.54 (s, 1H), 4.87 (s, 1H), 3.78 (s, 3H), 1.85 (s, 3H); <sup>13</sup>C NMR (101 MHz, DMSO-*d*<sub>6</sub>)  $\delta$  164.5, 162.0, 152.0, 143.7, 133.8, 133.4, 131.0, 129.0, 128.4, 128.3, 125.0, 103.8, 103.7, 90.9, 51.6, 27.7; HRMS (ESI): *m/z* calcd for C<sub>18</sub>H<sub>17</sub>O<sub>3</sub>S [M+H] 313.0898, found 313.0895.

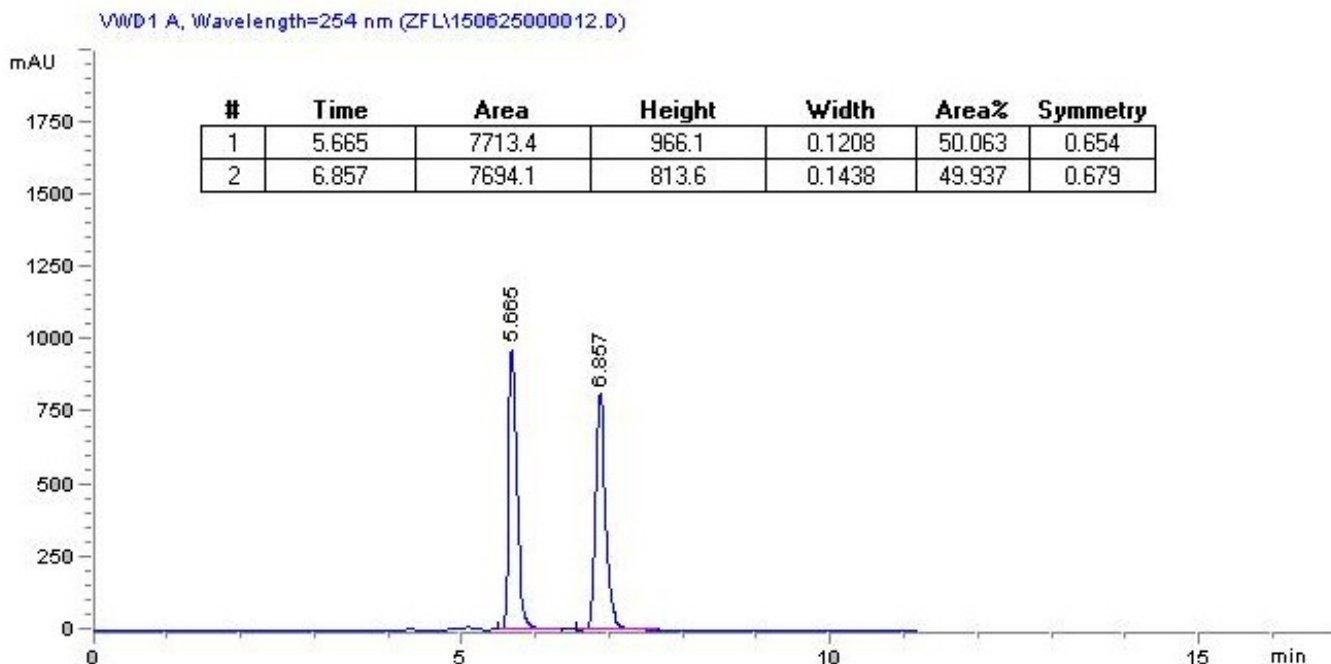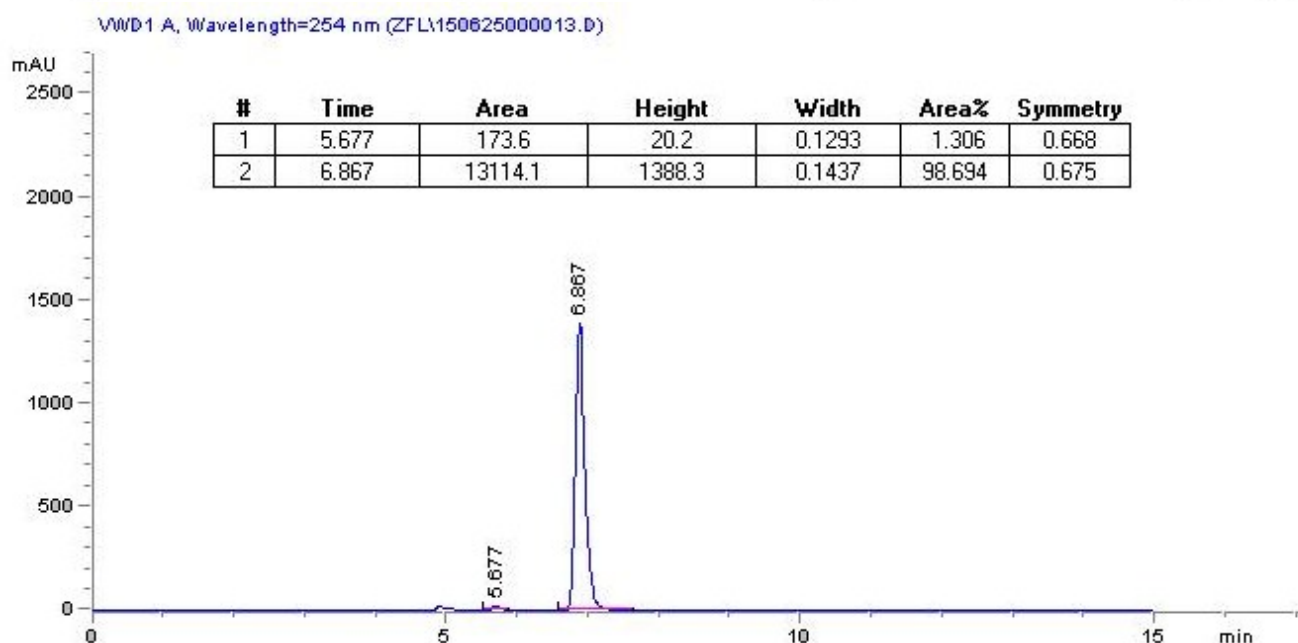

**(S)-Methyl 2,5-dimethyl-4-methylene-5-phenyl-4,5-dihydrofuran-3-carboxylate (3aj).** Yellow

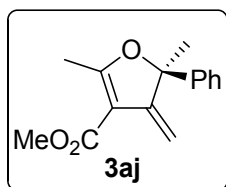

oil was obtained in 72% yield after purification with column chromatography on silica gel (hexanes/ethyl acetate, 70/1). 87% ee was determined by chiral HPLC (Chiralcel OJ-H, *n*-hexane/*i*-PrOH = 50/50, 0.8 mL min<sup>-1</sup>, 254 nm, 40 °C): *t*<sub>R</sub> (major) = 8.6 min, *t*<sub>R</sub> (minor) = 18.7 min. [ $\alpha$ ]<sub>D</sub><sup>29</sup> = 88.1 (*c* 1.00, CH<sub>2</sub>Cl<sub>2</sub>). <sup>1</sup>H

NMR (400 MHz, DMSO-*d*<sub>6</sub>)  $\delta$  7.41-7.32 (m, 5H), 5.39 (s, 1H), 4.63 (s, 1H), 3.71 (s, 3H), 2.40 (s, 3H), 1.76 (s, 3H); <sup>13</sup>C NMR (101 MHz, DMSO-*d*<sub>6</sub>)  $\delta$  174.3, 164.9, 151.7, 143.3, 128.9, 128.3, 125.2, 105.1, 100.9, 92.0, 51.3, 27.5, 15.9; HRMS (ESI): *m/z* calcd for C<sub>15</sub>H<sub>17</sub>O<sub>3</sub> [M+H] 245.1178, found 245.1175.

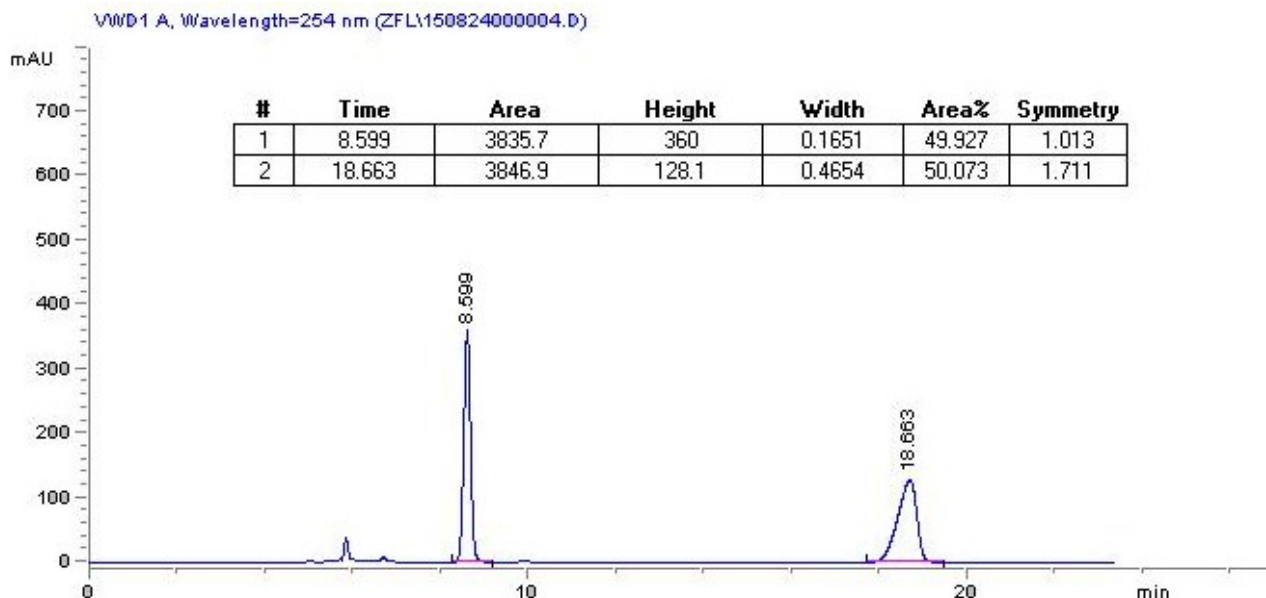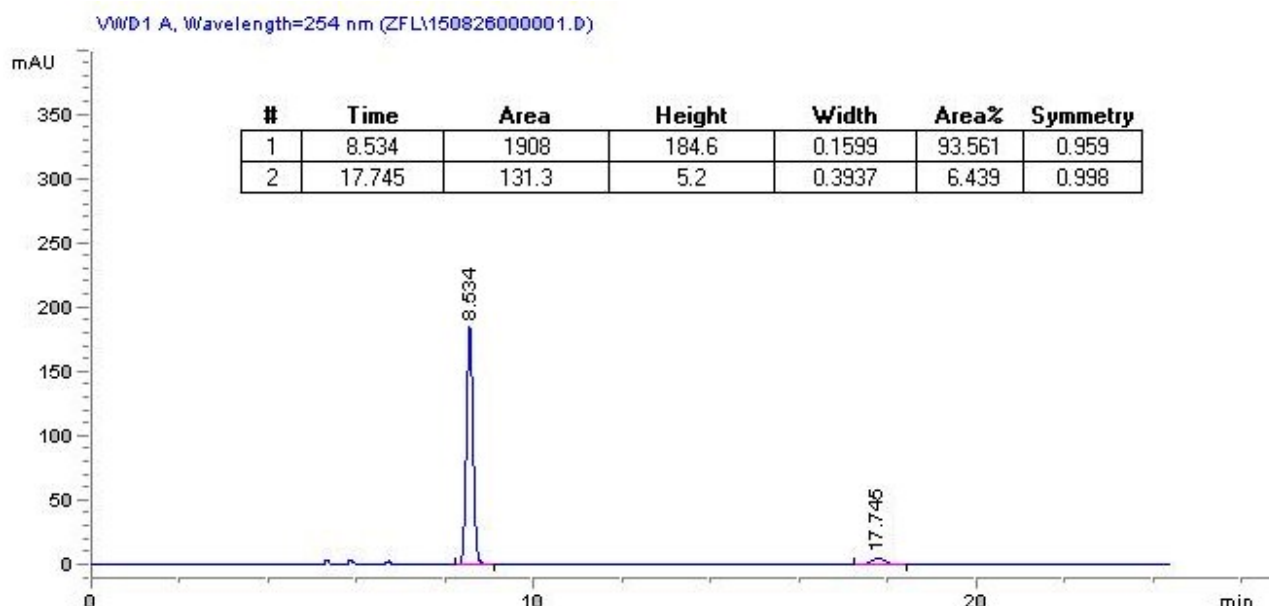

**(S)-Methyl 2-isopropyl-5-methyl-4-methylene-5-phenyl-4,5-dihydrofuran-3-carboxylate (3ak).**

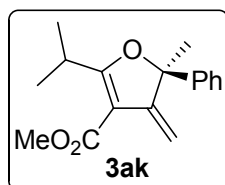

Yellow oil was obtained in 66% yield after purification with column chromatography on silica gel (hexanes/ethyl acetate, 100/1). 89% ee was determined by chiral HPLC (Chiralcel OJ-H, *n*-hexane/*i*-PrOH = 90/10, 0.8 mL min<sup>-1</sup>, 254 nm, 40 °C): *t*<sub>R</sub> (major) = 10.6 min, *t*<sub>R</sub> (minor) = 11.7 min. [ $\alpha$ ]<sub>D</sub><sup>22</sup> = -

77.8 (*c* = 1.0, CH<sub>2</sub>Cl<sub>2</sub>). <sup>1</sup>H NMR (400 MHz, DMSO-*d*<sub>6</sub>)  $\delta$  7.41-7.30 (m, 5H), 5.38 (s, 1H), 4.62 (s, 1H), 3.76-3.70 (m, 4H), 1.73 (s, 3H), 1.19 (dd, *J* = 12.8, 6.9 Hz, 6H); <sup>13</sup>C NMR (101 MHz, DMSO-*d*<sub>6</sub>)  $\delta$  181.0, 164.8, 152.0, 143.5, 128.9, 128.2, 124.9, 103.3, 101.2, 91.4, 51.3, 27.8, 27.5, 19.9, 19.8; HRMS (ESI): *m/z* calcd for C<sub>17</sub>H<sub>21</sub>O<sub>3</sub> [M+H] 273.1491, found 273.1493.

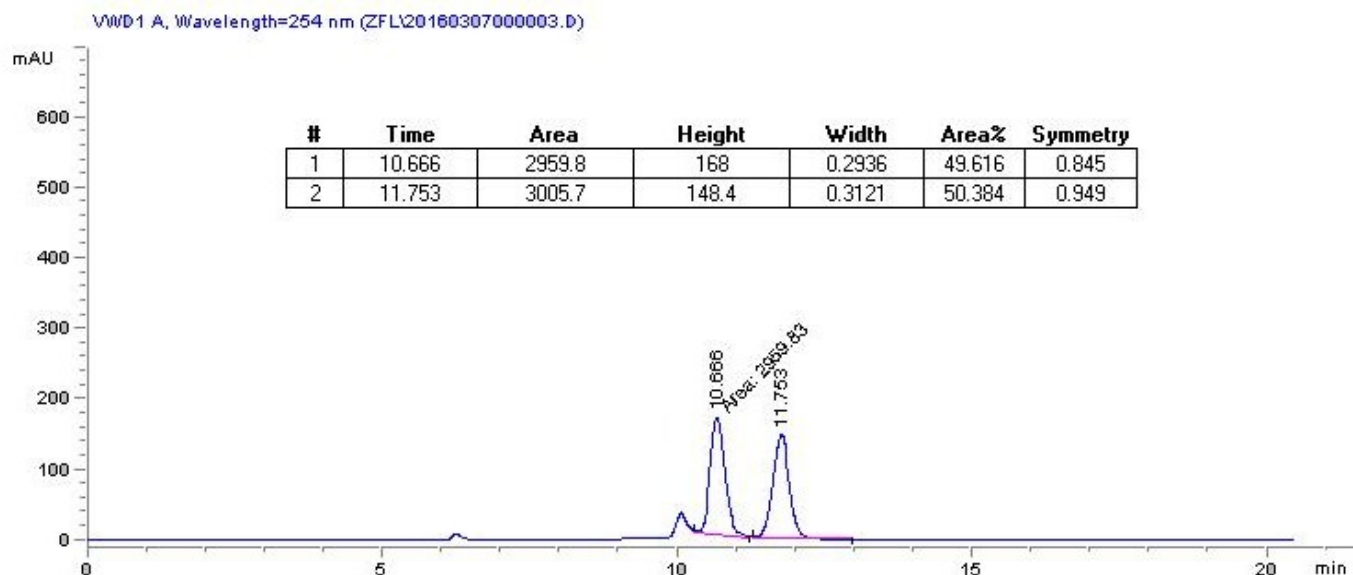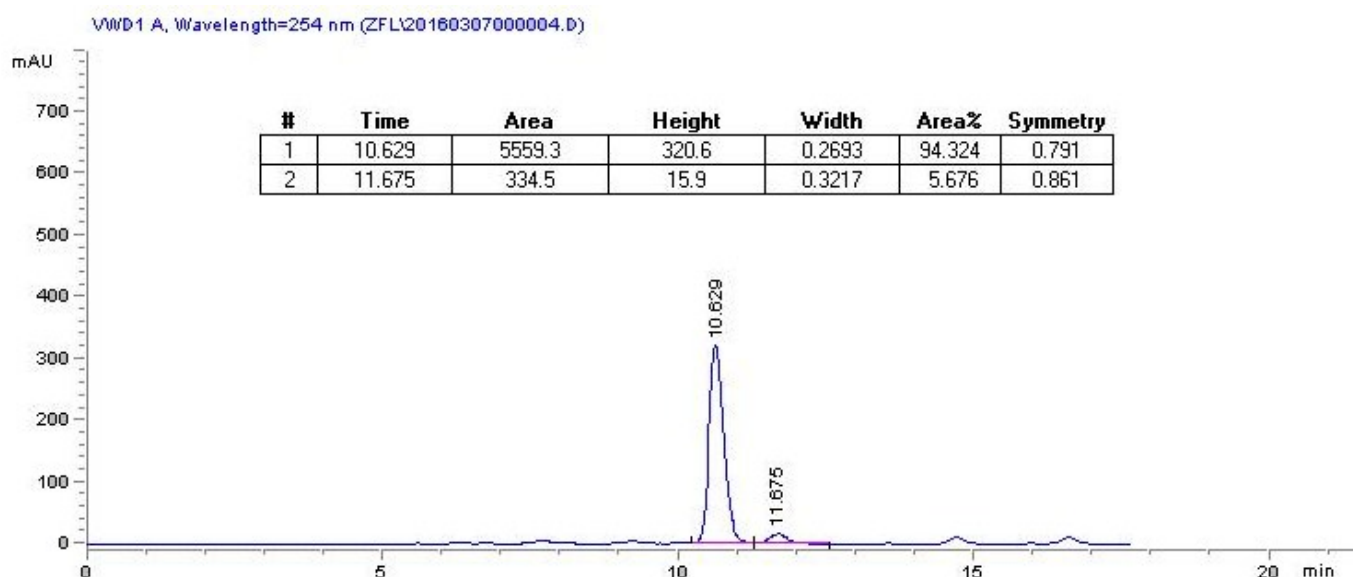

**(S)- Methyl 5-methyl-4-methylene-2-phenyl-5-(p-tolyl)-4,5-dihydrofuran-3-carboxylate (3ba).**

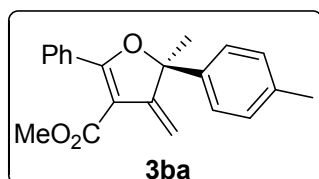

Pale yellow solid was obtained in 93% yield after purification with column chromatography on silica gel (hexanes/ethyl acetate, 70/1). 90% ee was determined by chiral HPLC (Chiralpak AD-H, *n*-hexane/*i*-PrOH = 90/10, 0.8 mL min<sup>-1</sup>, 254 nm, 40 °C): *t*<sub>R</sub> (major) = 9.5 min, *t*<sub>R</sub> (minor) = 6.4 min. [ $\alpha$ ]<sub>D</sub><sup>29</sup> = -48.1 (*c* = 1.04, CH<sub>2</sub>Cl<sub>2</sub>). <sup>1</sup>H NMR (400 MHz, DMSO-*d*<sub>6</sub>)  $\delta$  7.72-7.69 (m, 2H), 7.54-7.36 (m, 5H), 7.21-7.19 (m, 2H), 5.51 (s, 1H), 4.78 (s, 1H), 3.62 (s, 3H), 2.29 (s, 3H), 1.83 (s, 3H); <sup>13</sup>C NMR (101 MHz, DMSO-*d*<sub>6</sub>)  $\delta$  168.6, 164.5, 152.8, 140.6, 137.7, 131.4, 130.3, 129.5, 129.4, 128.4, 125.2, 105.6, 102.8, 91.4, 51.4, 27.6, 21.1; HRMS (ESI): *m/z* calcd for C<sub>21</sub>H<sub>21</sub>O<sub>3</sub> [M+H] 321.1491, found 321.1487.

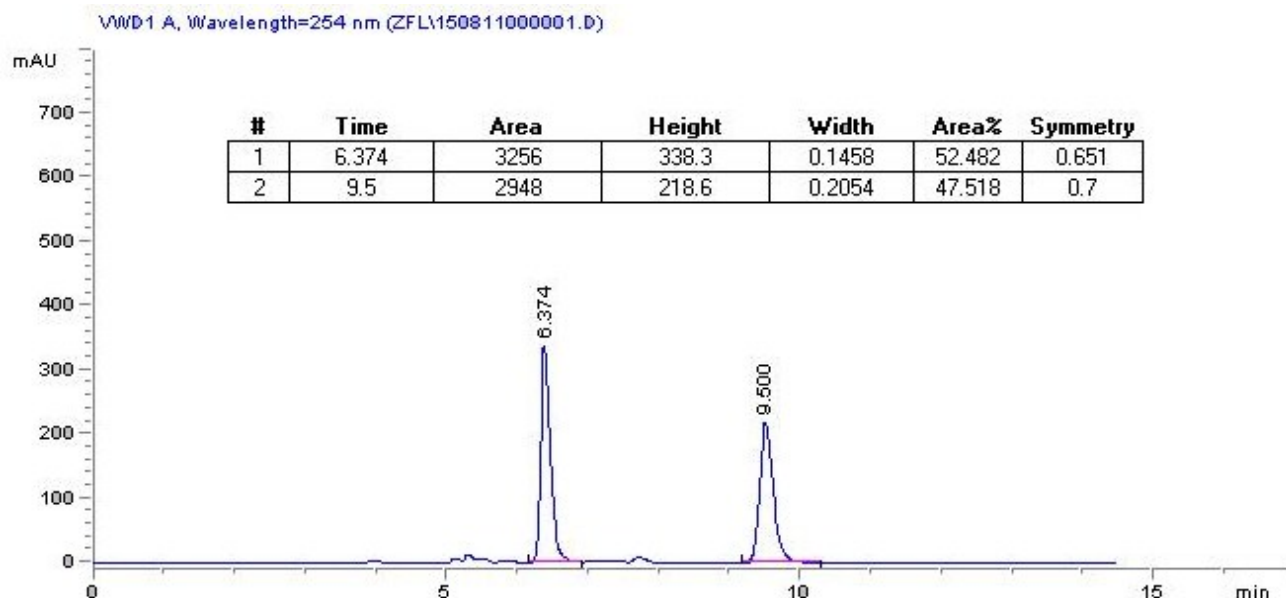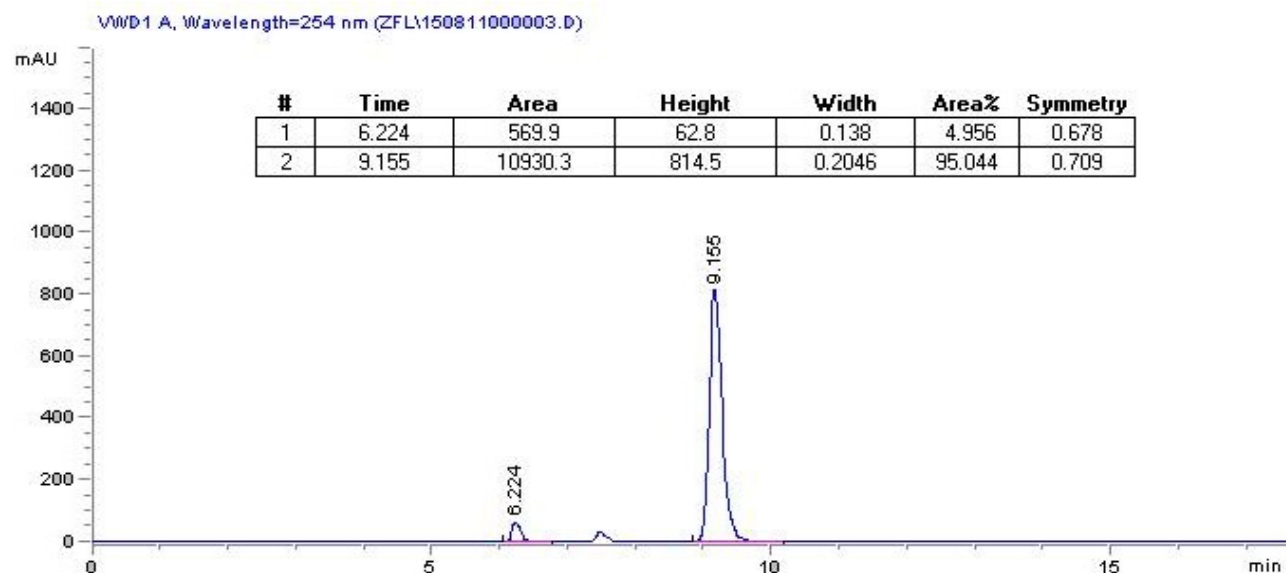

**(S)-Methyl 5-(4-fluorophenyl)-5-methyl-4-methylene-2-phenyl-4,5-dihydrofuran-3-carboxylate (3ca).**

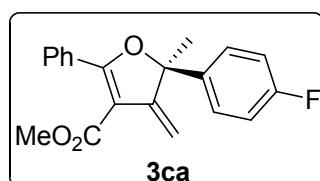

Yellow oil was obtained in 92% yield after purification with column chromatography on silica gel (hexanes/ethyl acetate, 100/1). 92% ee was determined by chiral HPLC (Chiralpak AD-H, *n*-hexane/*i*-PrOH = 90/10, 0.8 mL min<sup>-1</sup>, 254 nm, 40 °C): *t*<sub>R</sub> (major) = 8.3 min, *t*<sub>R</sub> (minor) = 6.2 min. [ $\alpha$ ]<sub>D</sub><sup>27</sup> = -52.2 (*c* = 1.07, CH<sub>2</sub>Cl<sub>2</sub>). <sup>1</sup>H NMR (400 MHz, DMSO-*d*<sub>6</sub>)  $\delta$  7.72-7.70 (m, 2H), 7.54-7.47 (m, 5H), 7.25-7.20 m, 2H), 5.53 (s, 1H), 4.83 (s, 1H), 3.63 (s, 3H), 1.85 (s, 3H); <sup>13</sup>C NMR (101 MHz, DMSO-*d*<sub>6</sub>)  $\delta$  168.4, 164.4, 162.2 (d, *J* = 244.6 Hz), 152.5, 139.8 (d, *J* = 3.0 Hz), 131.5, 130.1, 129.4, 128.5, 127.5 (d, *J* = 8.4 Hz), 115.8 (d, *J* = 21.5 Hz), 105.6, 103.2, 90.9, 51.4, 27.7; HRMS (ESI): *m/z* calcd for C<sub>20</sub>H<sub>18</sub>FO<sub>3</sub> [M+H] 325.1240, found 325.1238.



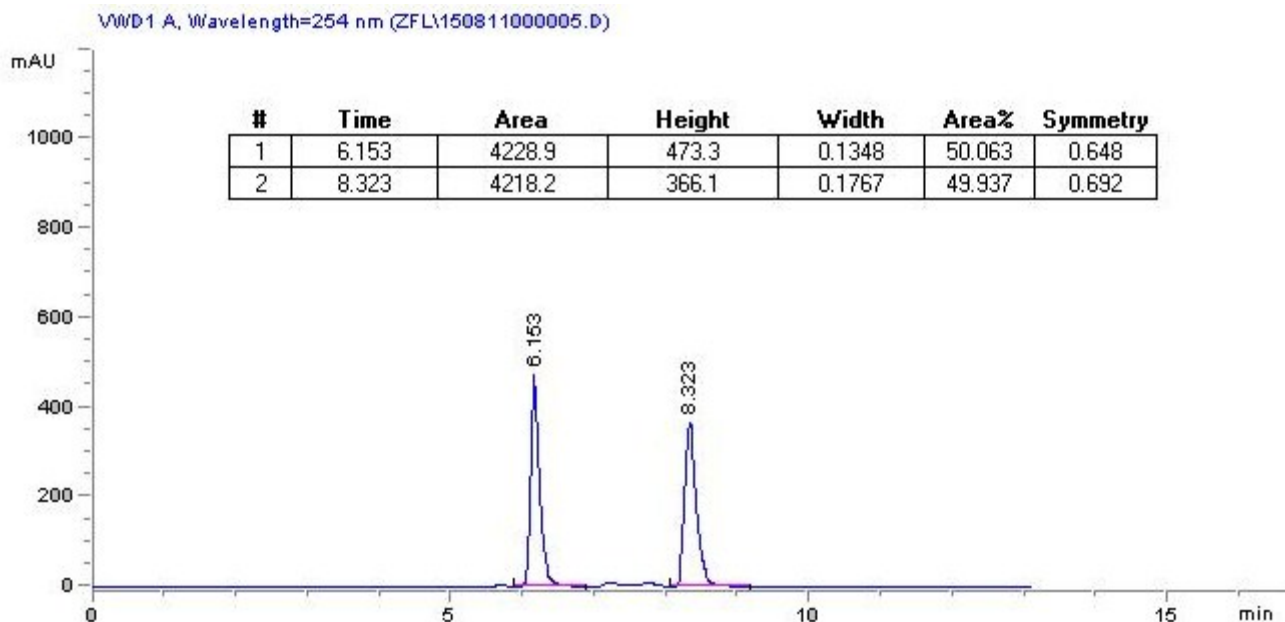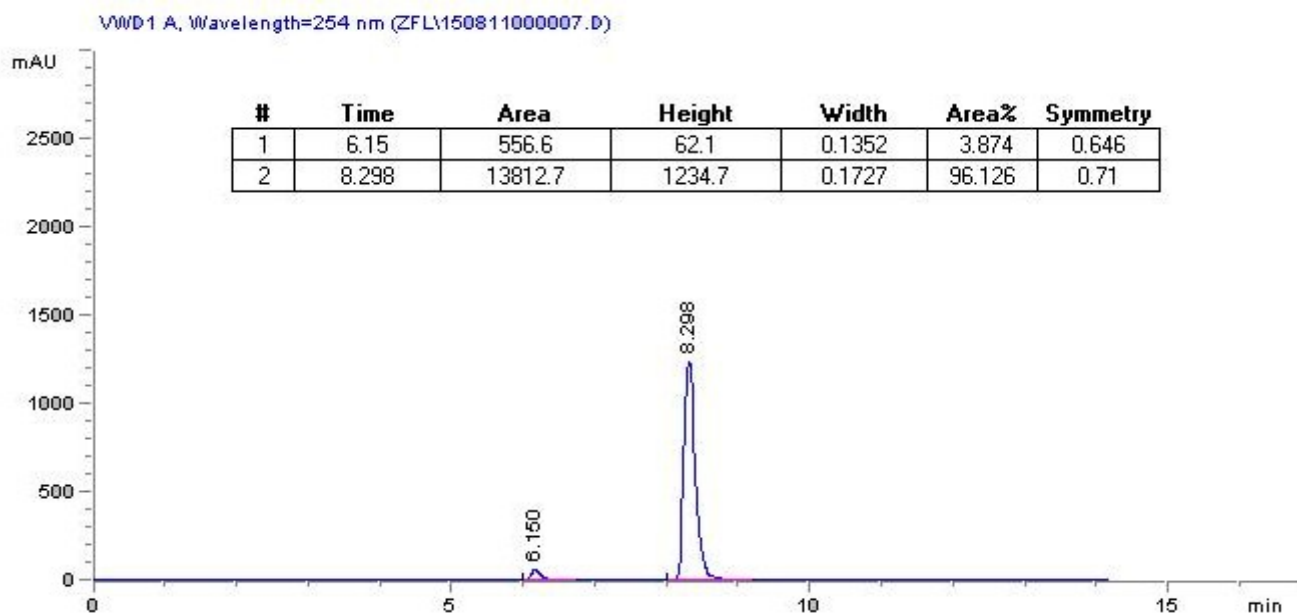

**(S)-Methyl 5-(4-bromophenyl)-5-methyl-4-methylene-2-phenyl-4,5-dihydrofuran-3-carboxylate (3da).**

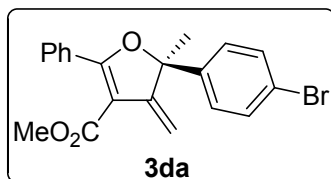

Pale yellow solid was obtained in 76% yield after purification with column chromatography on silica gel (hexanes/ethyl acetate, 100/1). M.p.: 100-101 °C. 94% ee was determined by chiral HPLC (Chiralpak AD-H, *n*-hexane/*i*-PrOH = 90/10, 0.8 mL min<sup>-1</sup>, 254 nm, 40 °C): *t*<sub>R</sub> (major) = 10.3 min, *t*<sub>R</sub> (minor) = 7.0 min. [ $\alpha$ ]<sub>D</sub><sup>23</sup> = -32.9 (*c* = 1.02, CH<sub>2</sub>Cl<sub>2</sub>). <sup>1</sup>H NMR (400 MHz, DMSO-*d*<sub>6</sub>)  $\delta$  7.72-7.70 (m, 2H), 7.61-7.43 (m, 7H), 5.52 (s, 1H), 4.85 (s, 1H), 3.62 (s, 3H), 1.84 (s, 3H); <sup>13</sup>C NMR (101 MHz, DMSO-*d*<sub>6</sub>)  $\delta$  168.4, 164.4, 152.2, 142.9, 132.0, 131.5, 130.0, 129.4, 128.5, 127.5, 121.8, 105.6, 103.4, 90.8, 51.5, 27.5; HRMS (ESI): *m/z* calcd for C<sub>20</sub>H<sub>18</sub>BrO<sub>3</sub> [M+H] 385.0439, found 385.0436.



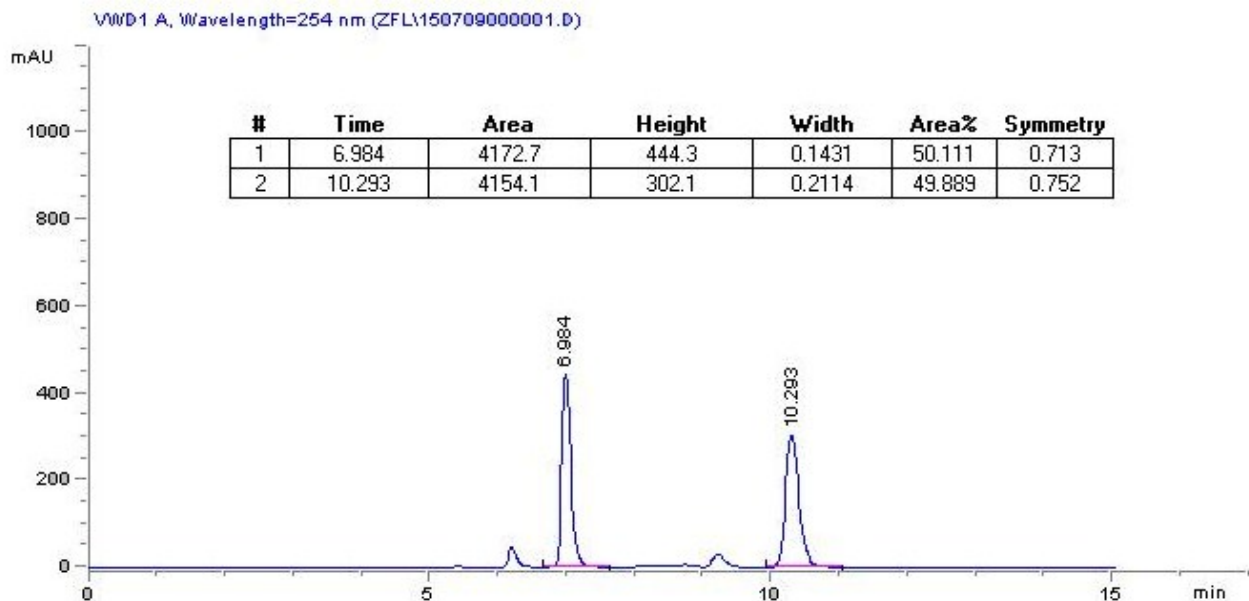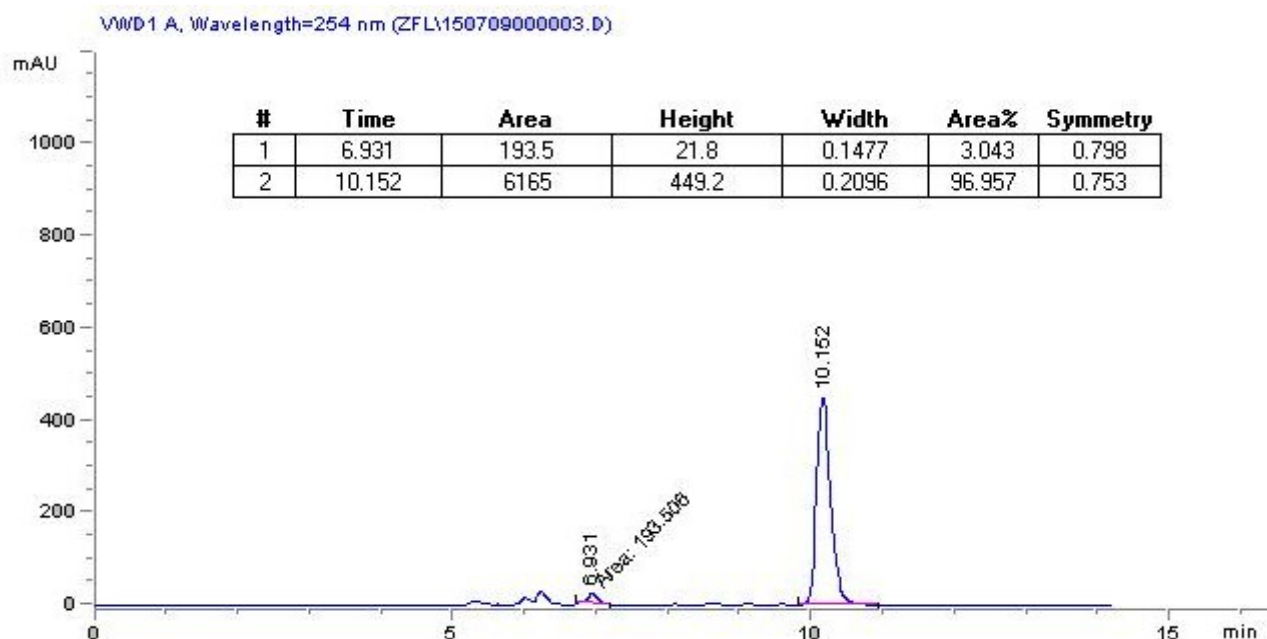

**(S)-Methyl 5-(4-chlorophenyl)-5-methyl-4-methylene-2-phenyl-4,5-dihydrofuran-3-carboxylate (3ea).**

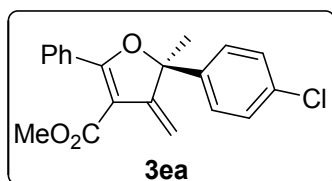

Yellow oil was obtained in 86% yield after purification with column chromatography on silica gel (hexanes/ethyl acetate, 70/1). 93% ee was determined by chiral HPLC (Chiralpak AD-H, *n*-hexane/*i*-PrOH = 90/10, 0.8 mL min<sup>-1</sup>, 254 nm, 40 °C): *t*<sub>R</sub> (major) = 9.5 min, *t*<sub>R</sub> (minor) = 6.7 min. [ $\alpha$ ]<sub>D</sub><sup>27</sup> = -56.9 (*c* = 1.00, CH<sub>2</sub>Cl<sub>2</sub>). <sup>1</sup>H NMR (400 MHz, DMSO-*d*<sub>6</sub>)  $\delta$  7.73-7.71 (m, 2H), 7.53-7.45 (m, 7H), 5.53 (s, 1H), 4.86 (s, 1H), 3.63 (s, 3H), 1.85 (s, 3H); <sup>13</sup>C NMR (101 MHz, DMSO-*d*<sub>6</sub>)  $\delta$  168.4, 164.4, 152.3, 142.5, 133.2, 131.5, 130.0, 129.4, 129.0, 128.5, 127.2, 105.6, 103.3, 90.8, 51.5, 27.6; HRMS (ESI): *m/z* calcd for C<sub>20</sub>H<sub>18</sub>ClO<sub>3</sub> [M+H] 341.0944, found: 341.0944.

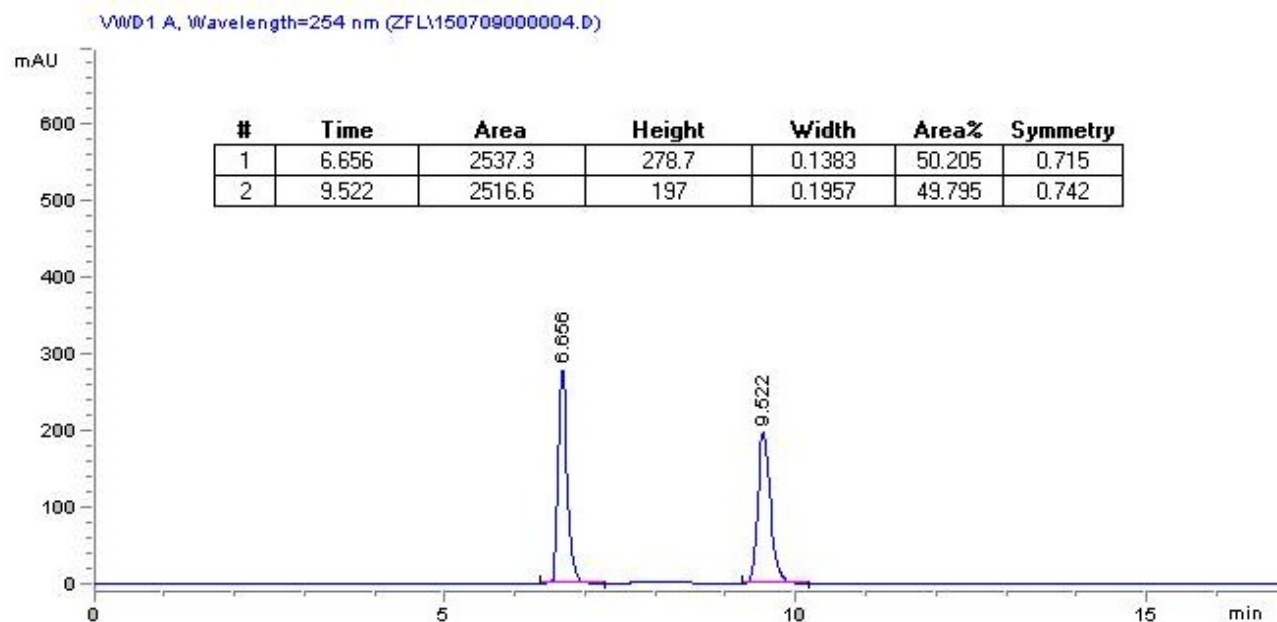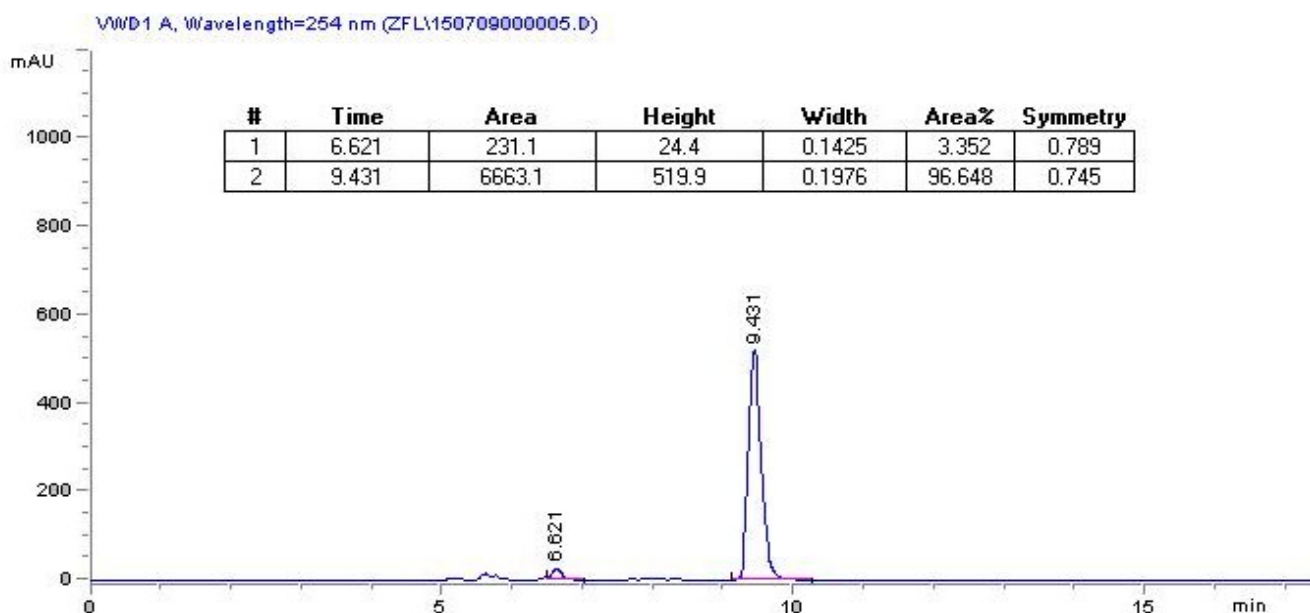

**(S)-Methyl 5-(3-chlorophenyl)-5-methyl-4-methylene-2-phenyl-4,5-dihydrofuran-3-carboxylate (3fa).**

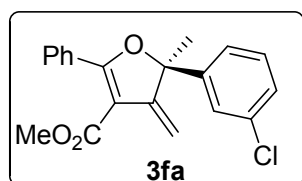

late (3fa). Yellow oil was obtained in 85% yield after purification with column chromatography on silica gel (hexanes/ethyl acetate, 100/1). 95% ee was determined by chiral HPLC (Chiralpak AD-H, *n*-hexane/*i*-PrOH = 90/10, 0.8 mL min<sup>-1</sup>, 254 nm, 40 °C): *t*<sub>R</sub> (major) = 7.9 min, *t*<sub>R</sub> (minor) = 5.6 min. [ $\alpha$ ]<sub>D</sub><sup>27</sup> = -39.1 (*c* = 0.88, CH<sub>2</sub>Cl<sub>2</sub>). <sup>1</sup>H NMR (400 MHz, DMSO-*d*<sub>6</sub>)  $\delta$  7.73-7.71 (m, 2H), 7.55-7.39 (m, 7H), 5.54 (s, 1H), 4.92 (s, 1H), 3.63 (s, 3H), 1.87 (s, 3H); <sup>13</sup>C NMR (101 MHz, DMSO-*d*<sub>6</sub>)  $\delta$  168.3, 164.3, 152.1, 145.9, 133.8, 131.6, 131.1, 129.9, 129.4, 128.5, 128.4, 125.0, 123.9, 105.7, 103.6, 90.7, 51.5, 27.5; HRMS (ESI): *m/z* calcd for C<sub>20</sub>H<sub>18</sub>ClO<sub>3</sub> [M+H] 341.0944, found 341.0944.

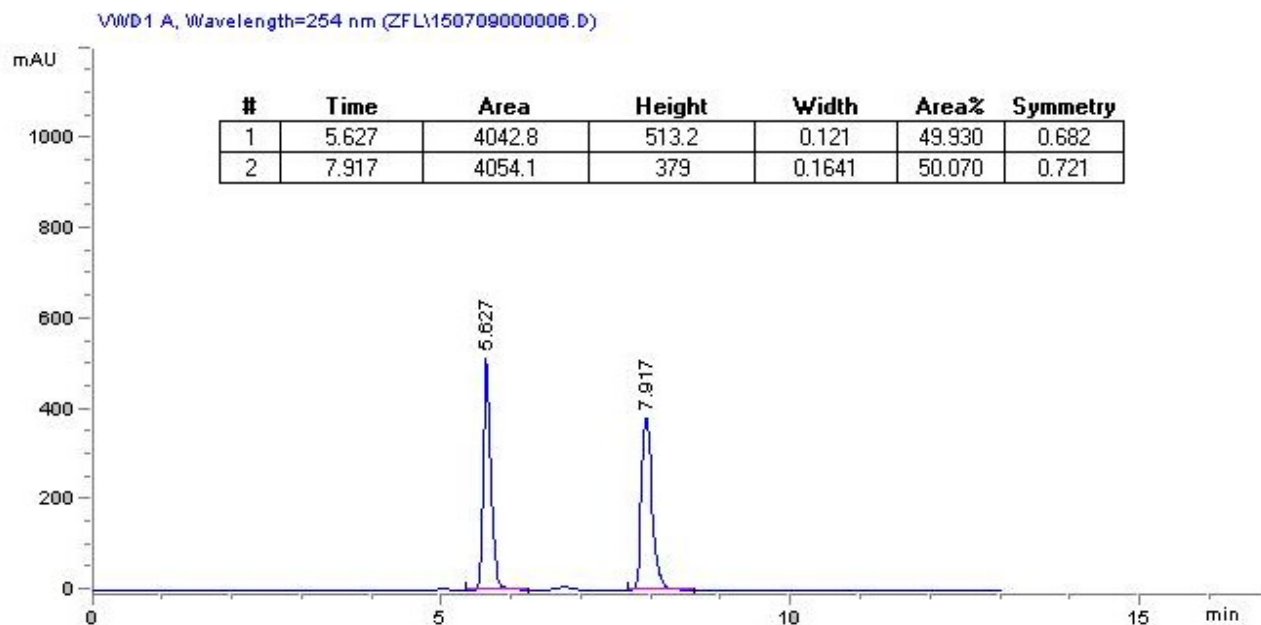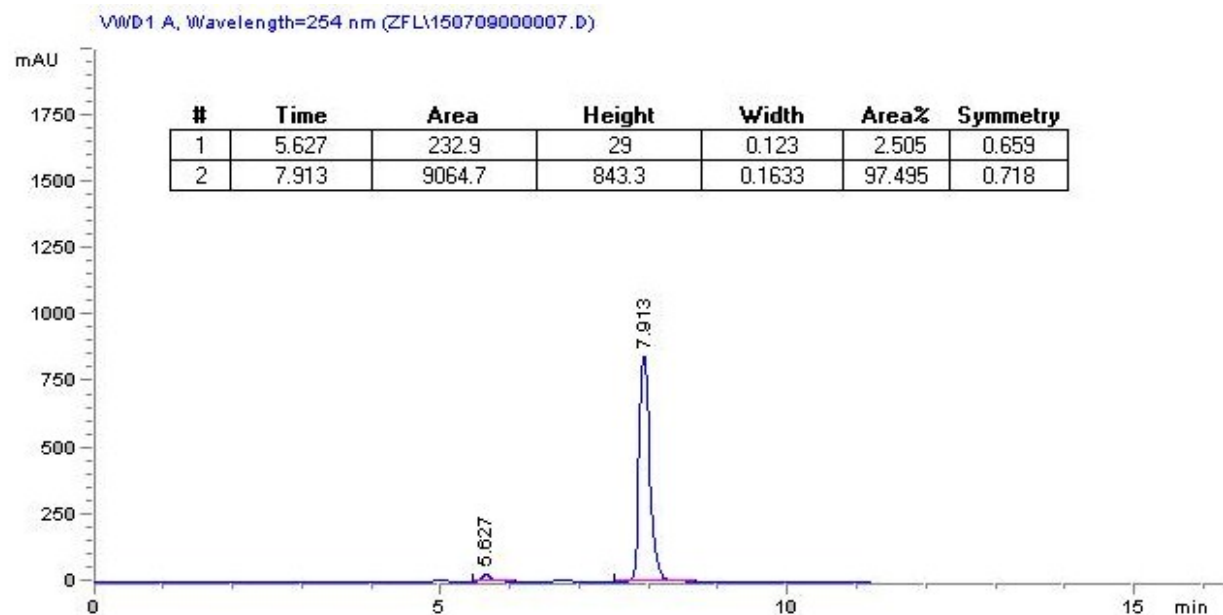

**(S)-Methyl 5-(2-chlorophenyl)-5-methyl-4-methylene-2-phenyl-4,5-dihydrofuran-3-carboxylate (3ga).**

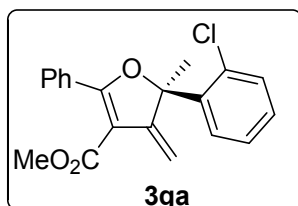

Pale yellow solid was obtained in 62% yield after purification with column chromatography on silica gel (hexanes/ethyl acetate, 100/1).

M.p.: 96-97 °C. 98% ee was determined by chiral HPLC (Chiralpak AD-H, *n*-hexane/*i*-PrOH = 90/10, 0.8 mL min<sup>-1</sup>, 254 nm, 40 °C): *t*<sub>R</sub> (major) = 9.7

min, *t*<sub>R</sub> (minor) = 6.7 min.  $[\alpha]_D^{29} = -28.8$  (*c* = 1.13, CH<sub>2</sub>Cl<sub>2</sub>). <sup>1</sup>H NMR (400 MHz, DMSO-*d*<sub>6</sub>)  $\delta$  7.79-7.67 (m, 3H), 7.53-7.41 (m, 6H), 5.44 (s, 1H), 4.41 (s, 1H), 3.65 (s, 3H), 1.88 (s, 3H); <sup>13</sup>C NMR (101 MHz, DMSO-*d*<sub>6</sub>)  $\delta$  168.9, 164.6, 152.4, 138.1, 134.2, 131.8, 131.3, 131.0, 130.6, 129.7, 129.3, 128.4, 127.4, 106.7, 102.0, 90.8, 51.4, 28.6; HRMS (ESI): *m/z* calcd for C<sub>20</sub>H<sub>18</sub>ClO<sub>3</sub> [M+H] 341.0944, found 341.0939.

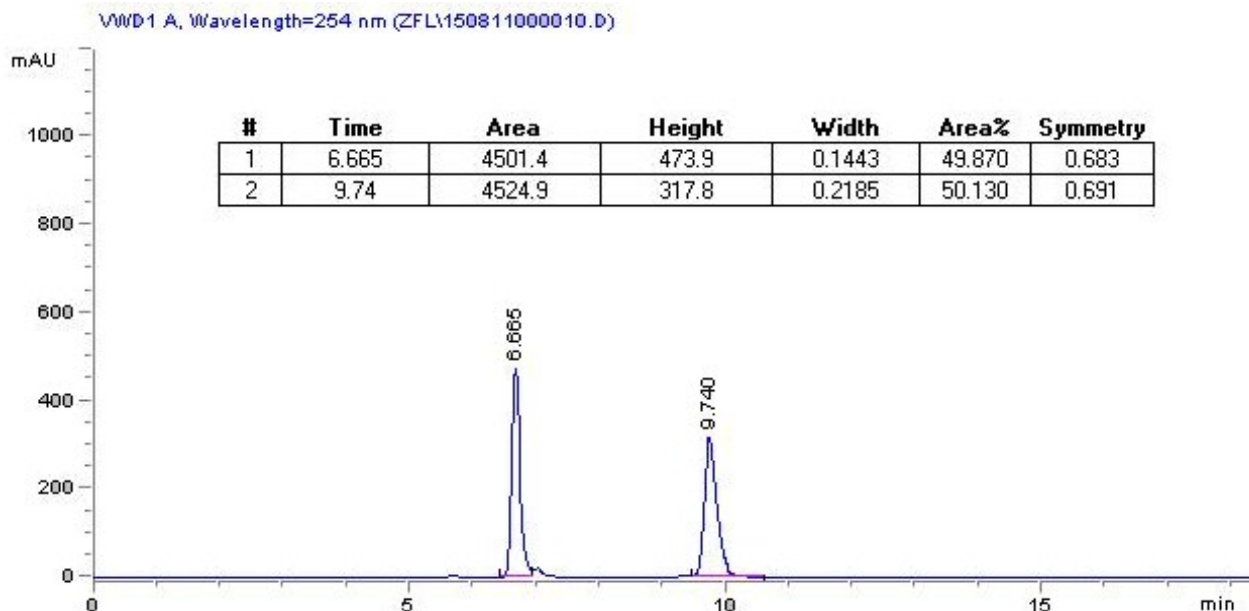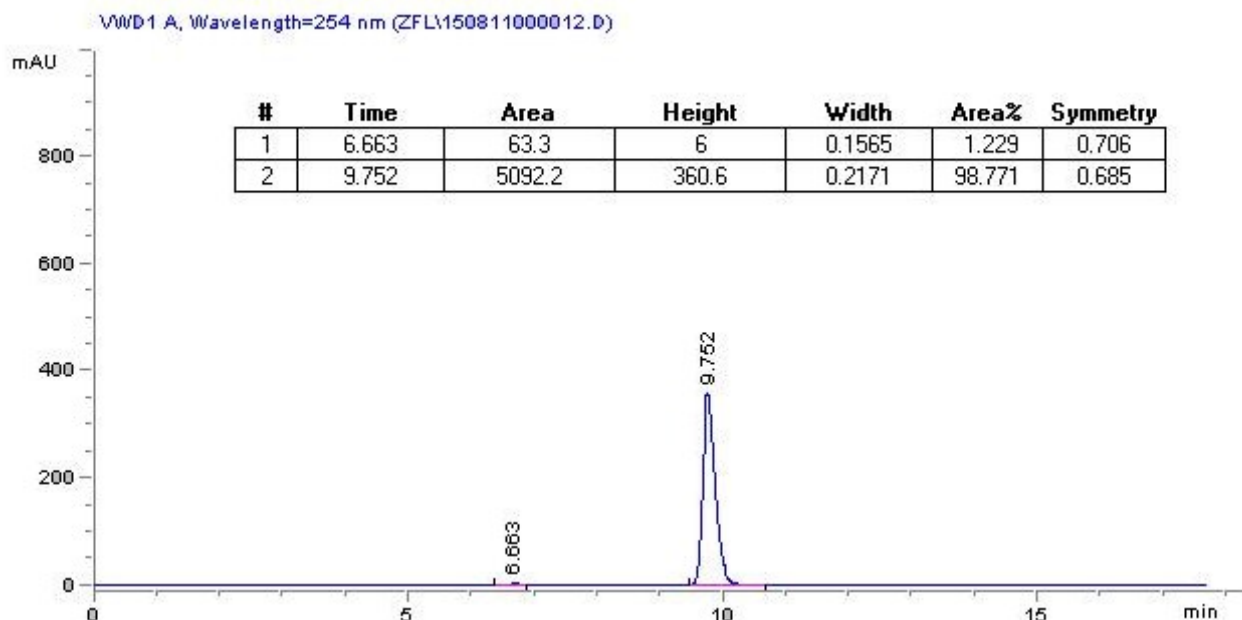

**(S)-Methyl 5-methyl-4-methylene-5-(naphthalen-2-yl)-2-phenyl-4,5-dihydrofuran-3-carboxylate (3ha).**

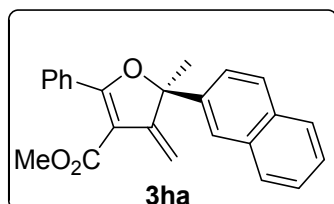

Yellow oil was obtained in 90% yield after purification with column chromatography on silica gel (hexanes/ethyl acetate, 50/1). 90% ee was determined by chiral HPLC (Chiralpak AD-H, *n*-hexane/*i*-PrOH = 90/10, 0.8 mL min<sup>-1</sup>, 254 nm, 40 °C): *t*<sub>R</sub> (major) = 12.9 min, *t*<sub>R</sub> (minor) = 8.4 min. [ $\alpha$ ]<sub>D</sub><sup>28</sup> = -37.3 (*c* = 1.00, CH<sub>2</sub>Cl<sub>2</sub>). <sup>1</sup>H NMR (400 MHz, DMSO-*d*<sub>6</sub>)  $\delta$  8.07-7.75 (m, 6H), 7.59-7.46 (m, 6H), 5.58 (s, 1H), 4.86 (s, 1H), 3.65 (s, 3H), 1.98 (s, 3H); <sup>13</sup>C NMR (101 MHz, DMSO-*d*<sub>6</sub>)  $\delta$  168.8, 164.5, 152.6, 140.7, 133.0, 132.9, 131.5, 130.2, 129.5, 128.9, 128.8, 128.5, 127.9, 127.0, 126.9, 123.9, 123.7, 105.8, 103.3, 91.6, 51.5, 27.6; HRMS (ESI): *m/z* calcd for C<sub>24</sub>H<sub>21</sub>O<sub>3</sub> [M+H] 357.1491, found 357.1489.

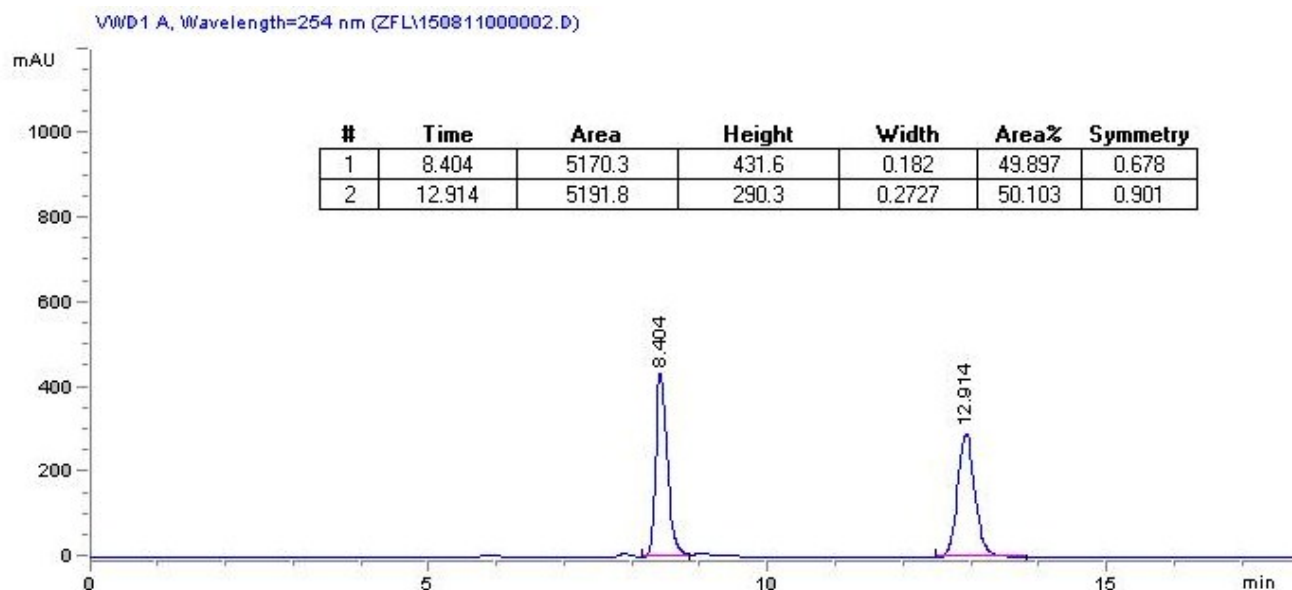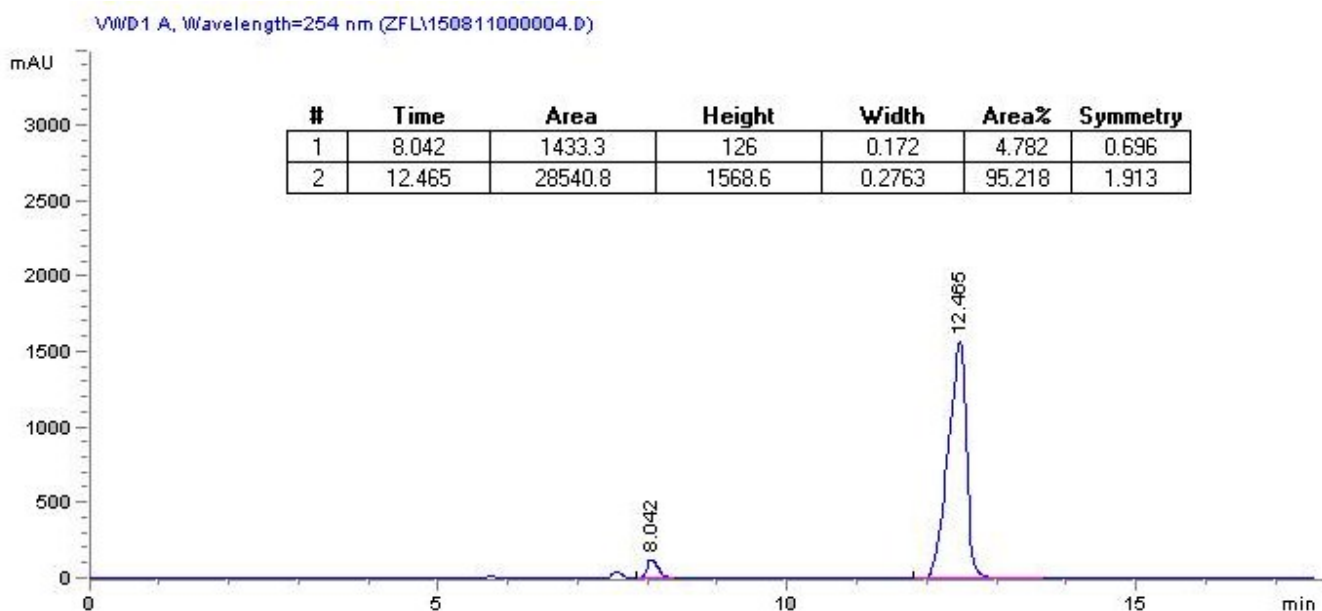

**(S)-Methyl 2-methyl-3-methylene-5-phenyl-2,3-dihydro-[2,2'-bifuran]-4-carboxylate (6ia).**

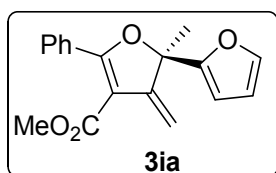

Yellow oil was obtained in 85% yield after purification with column chromatography on silica gel (hexanes/ethyl acetate, 70/1). 86% ee was determined by chiral HPLC (Chiralpak AD-H, *n*-hexane/*i*-PrOH = 90/10, 0.8 mL min<sup>-1</sup>, 254 nm, 40 °C): *t*<sub>R</sub> (major) = 8.1 min, *t*<sub>R</sub> (minor) = 6.1 min.

$[\alpha]_D^{22} = -59.1$  (*c* = 1.13, CH<sub>2</sub>Cl<sub>2</sub>). <sup>1</sup>H NMR (400 MHz, DMSO-*d*<sub>6</sub>)  $\delta$  7.70 (d, *J* = 0.7 Hz, 1H), 7.64–7.62 (m, 3H), 7.53–7.43 (m, 3H), 6.56 (d, *J* = 3.3 Hz, 1H), 6.47 (dd, *J* = 3.2, 1.8 Hz, 1H), 5.57 (s, 1H), 4.73 (s, 1H), 3.65 (s, 3H), 1.83 (s, 3H); <sup>13</sup>C NMR (101 MHz, DMSO-*d*<sub>6</sub>)  $\delta$  168.4, 164.4, 154.3, 149.9, 144.4, 131.5, 130.1, 129.4, 128.4, 110.9, 108.7, 105.5, 103.3, 86.8, 51.5, 26.0; HRMS (ESI): *m/z* calcd for C<sub>18</sub>H<sub>17</sub>O<sub>4</sub> [M+H] 297.1127, found 297.1124.

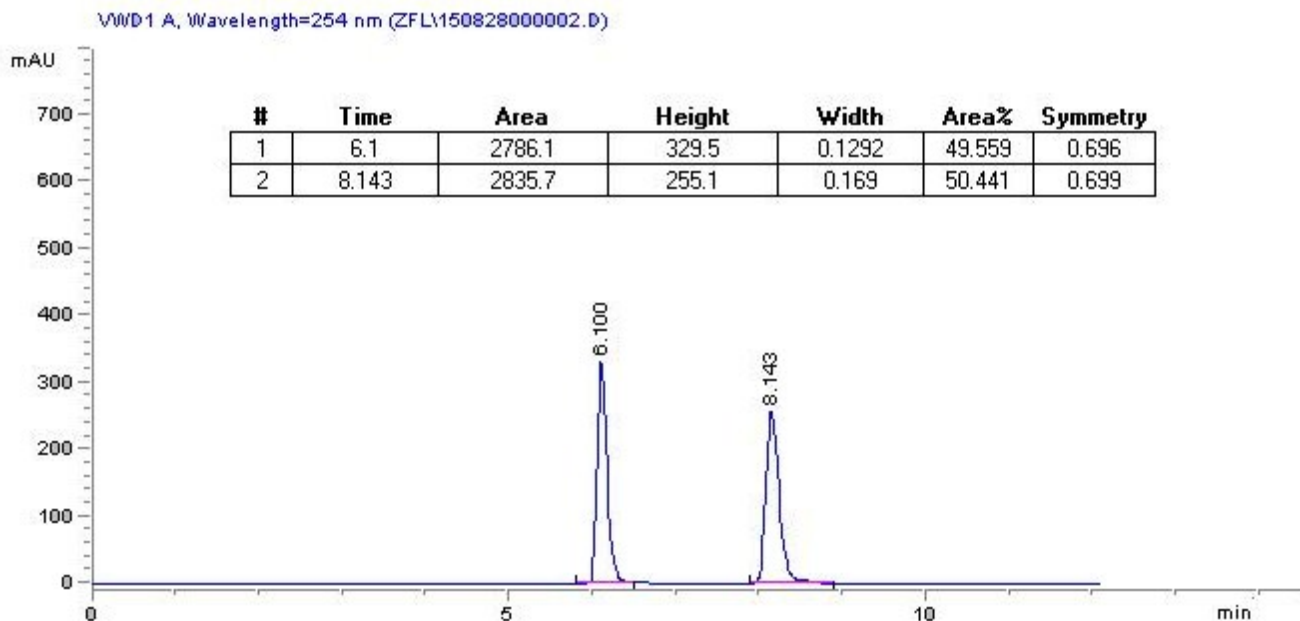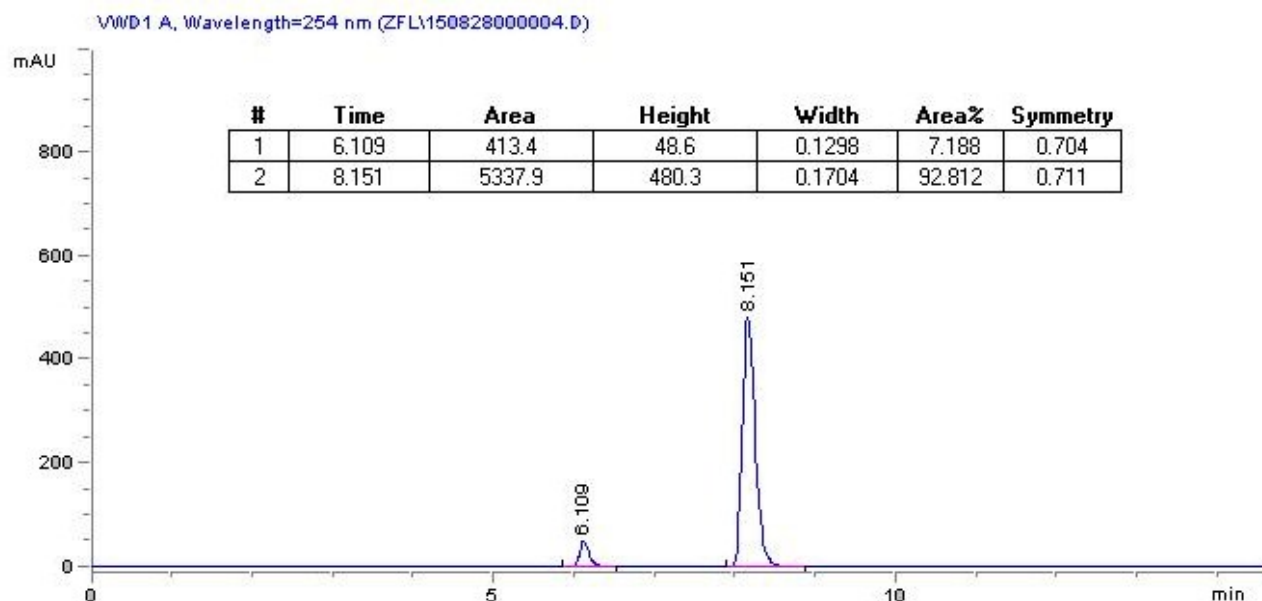

**(S)-Methyl 5-ethyl-4-methylene-2,5-diphenyl-4,5-dihydrofuran-3-carboxylate (3ja).** Yellow oil

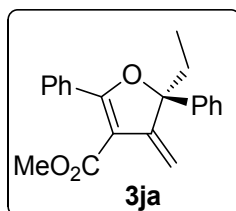

was obtained in 81% yield after purification with column chromatography on silica gel (hexanes/ethyl acetate, 100/1). 93% ee was determined by chiral HPLC (Chiralpak AD-H, *n*-hexane/*i*-PrOH = 90/10, 0.8 mL min<sup>-1</sup>, 254 nm, 40 °C): *t*<sub>R</sub> (major) = 7.4 min, *t*<sub>R</sub> (minor) = 6.0 min. [ $\alpha$ ]<sub>D</sub><sup>18</sup> = +55.3 (*c* = 0.93, CH<sub>2</sub>Cl<sub>2</sub>).

<sup>1</sup>H NMR (400 MHz, DMSO-*d*<sub>6</sub>)  $\delta$  7.77-7.75 (m, 2H), 7.56-7.29 (m, 8H), 5.57 (s, 1H), 4.93 (s, 1H), 3.61 (s, 3H), 2.31-2.13 (m, 2H), 0.89 (t, *J* = 7.2 Hz, 3H); <sup>13</sup>C NMR (101 MHz, DMSO-*d*<sub>6</sub>)  $\delta$  169.0, 164.4, 150.7, 143.2, 131.5, 130.1, 129.3, 129.0, 128.5, 128.1, 124.8, 106.5, 102.9, 94.0, 51.4, 33.4, 8.3; HRMS (ESI): *m/z* calcd for C<sub>21</sub>H<sub>21</sub>O<sub>3</sub> [M+H] 321.1491, found 321.1492.



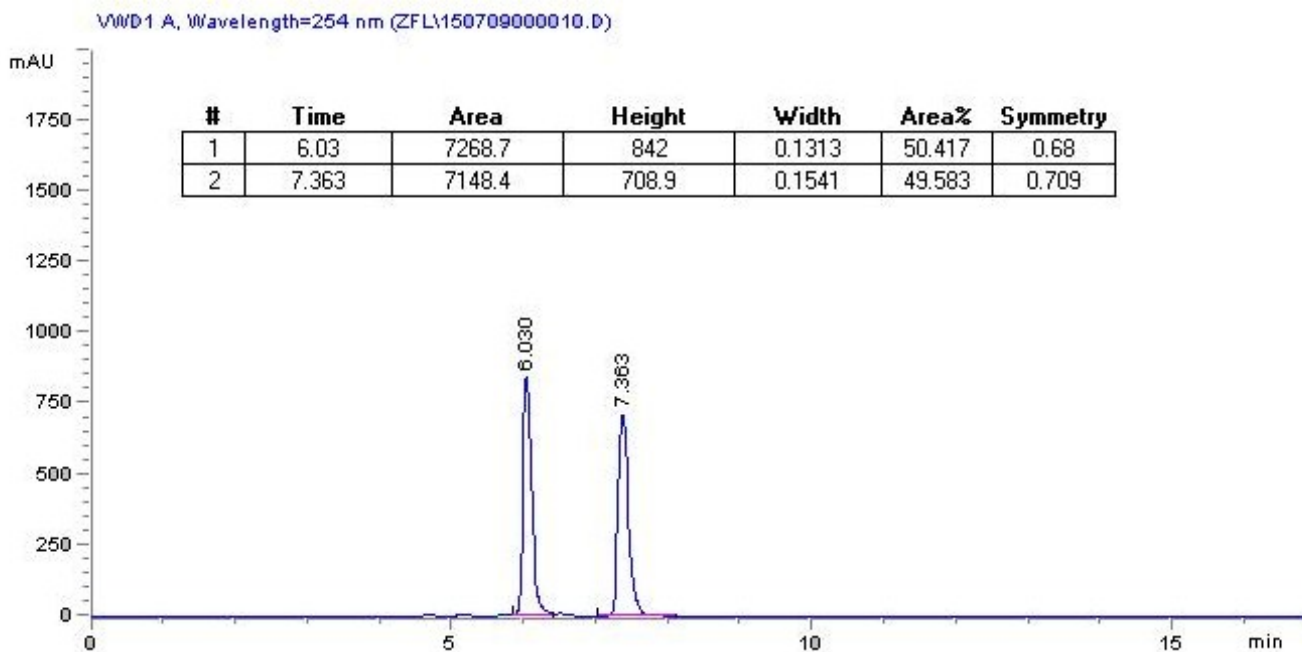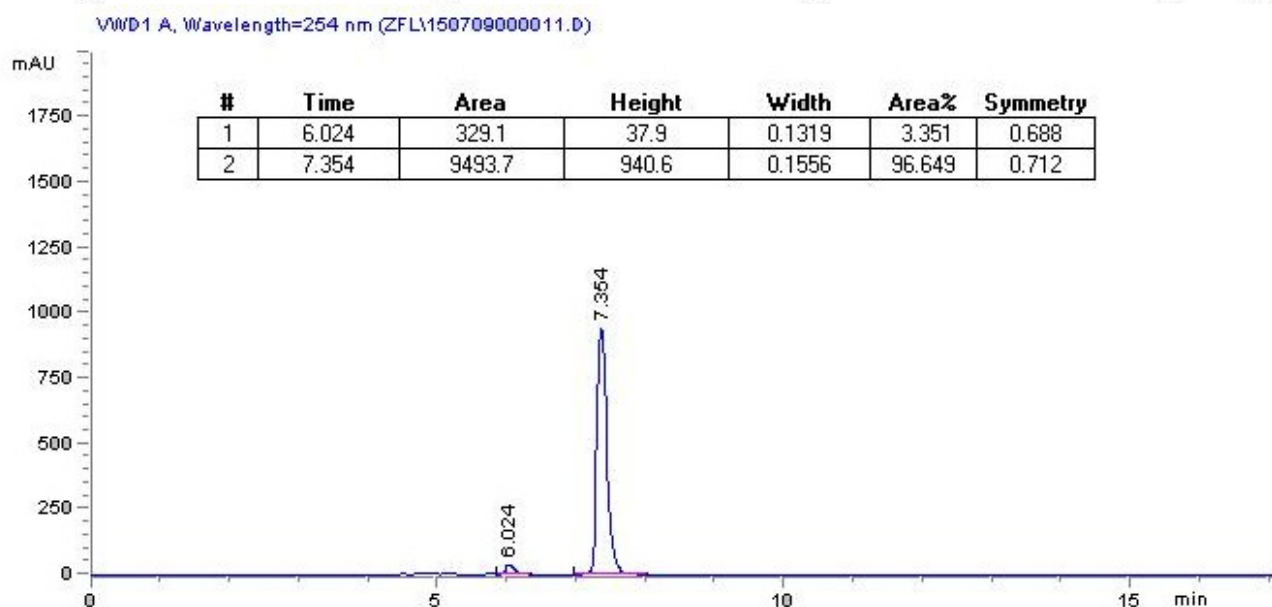

**(S)-Methyl 4-methylene-2,5-diphenyl-5-propyl-4,5-dihydrofuran-3-carboxylate (3ka).**

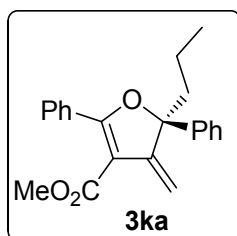

Yellow oil was obtained in 61% yield after purification with column chromatography on silica gel (hexanes/ethyl acetate, 100/1). 94% ee was determined by chiral HPLC (Chiralpak AD-H, *n*-hexane/*i*-PrOH = 95/5, 0.8 mL min<sup>-1</sup>, 254 nm, 40 °C): *t*<sub>R</sub> (major) = 7.8 min, *t*<sub>R</sub> (minor) = 6.6 min. [ $\alpha$ ]<sub>D</sub><sup>22</sup> = +99.1 (*c* = 0.40, CH<sub>2</sub>Cl<sub>2</sub>). <sup>1</sup>H NMR (400 MHz, DMSO-*d*<sub>6</sub>)  $\delta$  7.75-7.73 (m, 2H), 7.57-7.30 (m, 8H), 5.51 (s, 1H), 4.94 (s, 1H), 3.61 (s, 3H), 2.26-2.08 (m, 2H), 1.43-1.21 (m, 2H), 0.91 (t, *J* = 7.4 Hz, 1H); <sup>13</sup>C NMR (101 MHz, DMSO-*d*<sub>6</sub>)  $\delta$  168.8, 164.4, 151.1, 143.3, 131.5, 130.1, 129.3, 129.0, 128.6, 128.1, 124.8, 106.3, 102.8, 93.7, 51.5, 42.7, 17.1, 14.4; HRMS (ESI): *m/z* calcd for C<sub>22</sub>H<sub>23</sub>O<sub>3</sub> [M+H] 335.1647, found 335.1648.



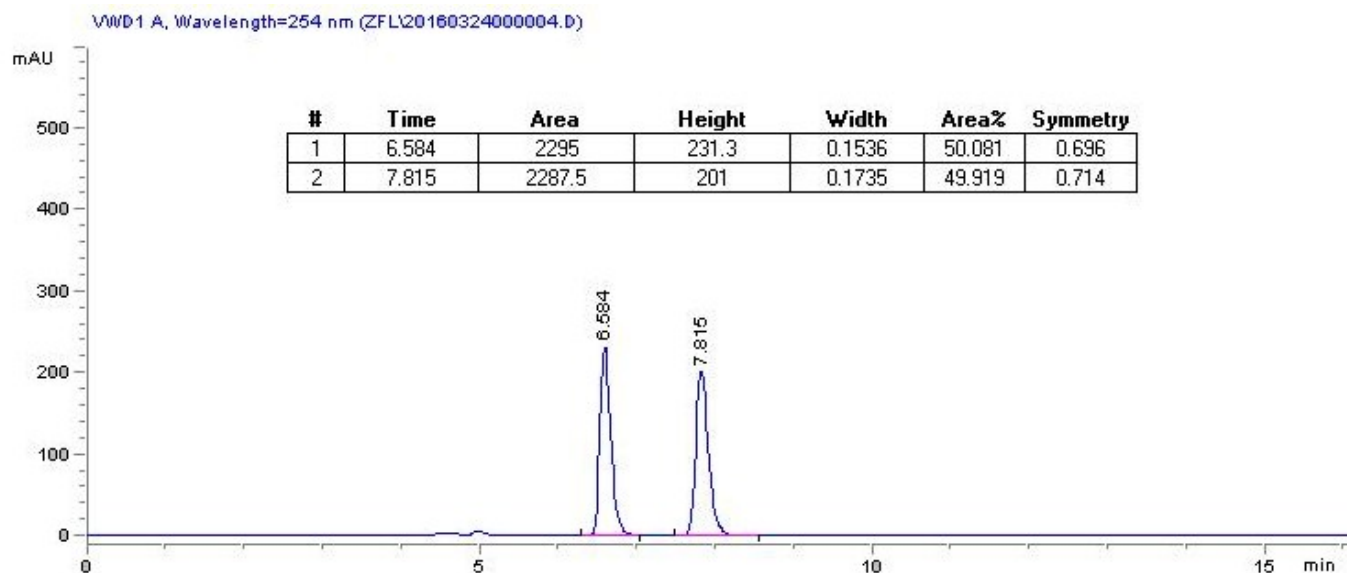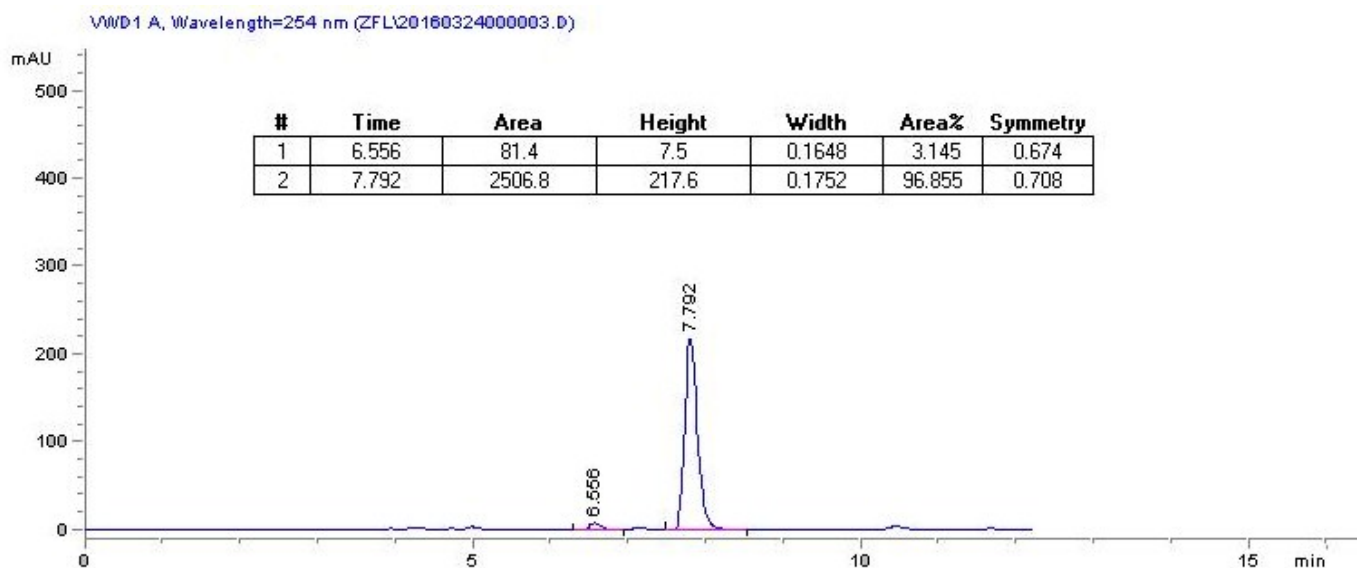

**(S)-Methyl 5-ethyl-5-methyl-4-methylene-2-phenyl-4,5-dihydrofuran-3-carboxylate (3la).**

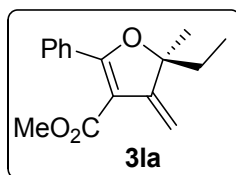

Yellow oil was obtained in 75% yield after purification with column chromatography on silica gel (hexanes/ethyl acetate, 100/1). 22% ee was determined by chiral HPLC (Chiralpak AD-H, *n*-hexane/*i*-PrOH=98/2, 0.8 mL min<sup>-1</sup>, 254 nm, 40 °C): *t*<sub>R</sub> (major) = 9.5 min, *t*<sub>R</sub> (minor) = 7.0 min. [ $\alpha$ ]<sub>D</sub><sup>19</sup> = -16.7

(*c* = 1.10, CH<sub>2</sub>Cl<sub>2</sub>). <sup>1</sup>H NMR (400 MHz, DMSO-*d*<sub>6</sub>)  $\delta$  7.64-7.62 (m, 2H), 7.52-7.43 (m, 3H), 5.45 (s, 1H), 4.72 (s, 1H), 3.61 (s, 3H), 1.83 (dq, *J* = 14.5, 7.3 Hz, 1H), 1.69 (dq, *J* = 14.5, 7.3 Hz, 1H), 1.42 (s, 3H), 0.83 (t, *J* = 7.3 Hz, 3H); <sup>13</sup>C NMR (101 MHz, DMSO-*d*<sub>6</sub>)  $\delta$  169.2, 164.6, 151.5, 131.2, 130.6, 129.2, 128.3, 106.3, 100.2, 92.0, 51.2, 34.2, 27.4, 7.9; HRMS (ESI): *m/z* calcd for C<sub>16</sub>H<sub>18</sub>O<sub>3</sub> [M + H] 259.1334, found 259.1326.

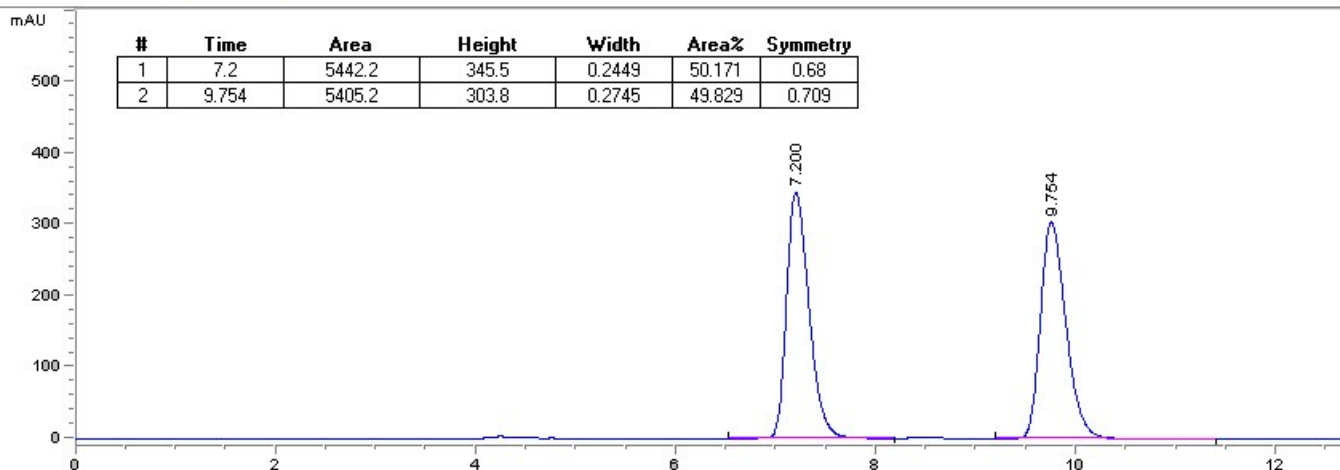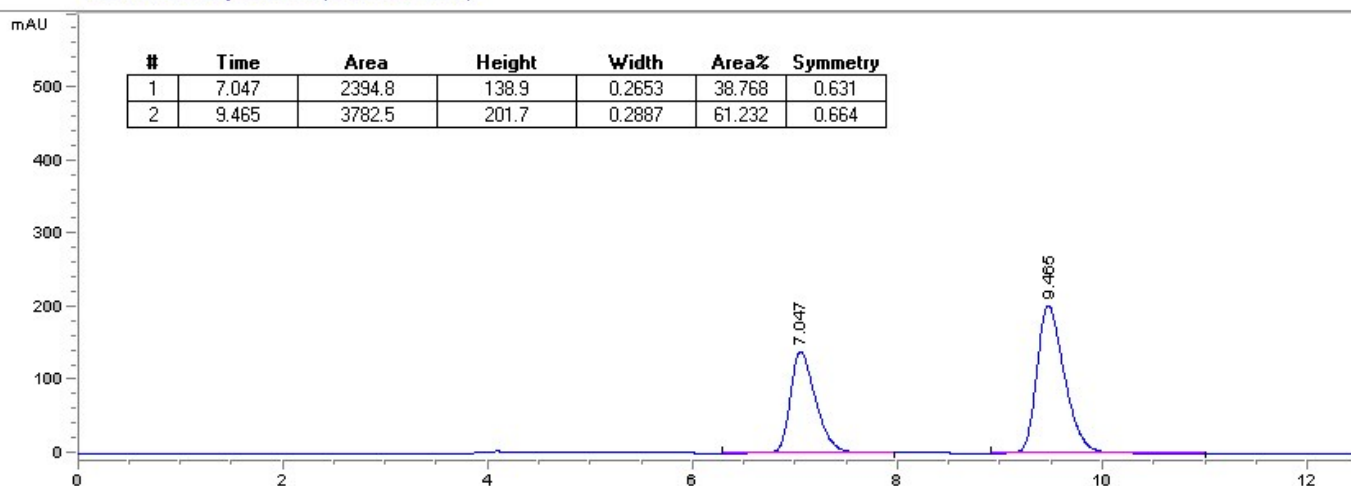

## Synthetic Application of Cycloadduct 3aa

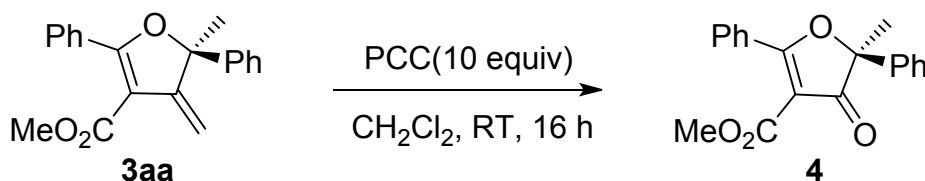

A solution of **3aa** (61.3 mg, 0.20 mmol) in 4 mL of anhydrous dichloromethane was added PCC (pyridinium chlorochromate 431.1mg, 2.0 mmol), and the resulting solution was stirred at room temperature for 16 h. After the filtration of undissolved solids, the filtrate was concentrated under reduced pressure, and the residue was purified by silica gel chromatography (hexanes/ethyl acetate, 20/1) to afford **4** (40.1 mg, 65% yield) as a colorless oil. 95% ee was determined by chiral HPLC (Chiralpak AD-H, *n*-hexane/*i*-PrOH = 90/10, 0.8 mL min<sup>-1</sup>, 254 nm, 40 °C): *t*<sub>R</sub> (major) = 13.7 min, *t*<sub>R</sub> (minor) = 11.6 min. [ $\alpha$ ]<sub>D</sub><sup>22</sup> = 16.9 (*c* = 1.00, CH<sub>2</sub>Cl<sub>2</sub>). <sup>1</sup>H NMR (400 MHz,

CDCl<sub>3</sub>)  $\delta$  8.03 (d,  $J$  = 7.5 Hz, 2H), 7.64-7.33 (m, 8H), 3.82 (s, 3H), 1.89 (s, 3H); <sup>13</sup>C NMR (101 MHz, CDCl<sub>3</sub>)  $\delta$  199.0, 187.6, 163.3, 137.4, 133.5, 129.5, 128.8, 128.7, 128.5, 128.4, 124.6, 106.4, 90.7, 52.0, 24.8; HRMS (ESI):  $m/z$  calcd for C<sub>19</sub>H<sub>17</sub>O<sub>4</sub> [M+H] 309.1127, found 309.1127.

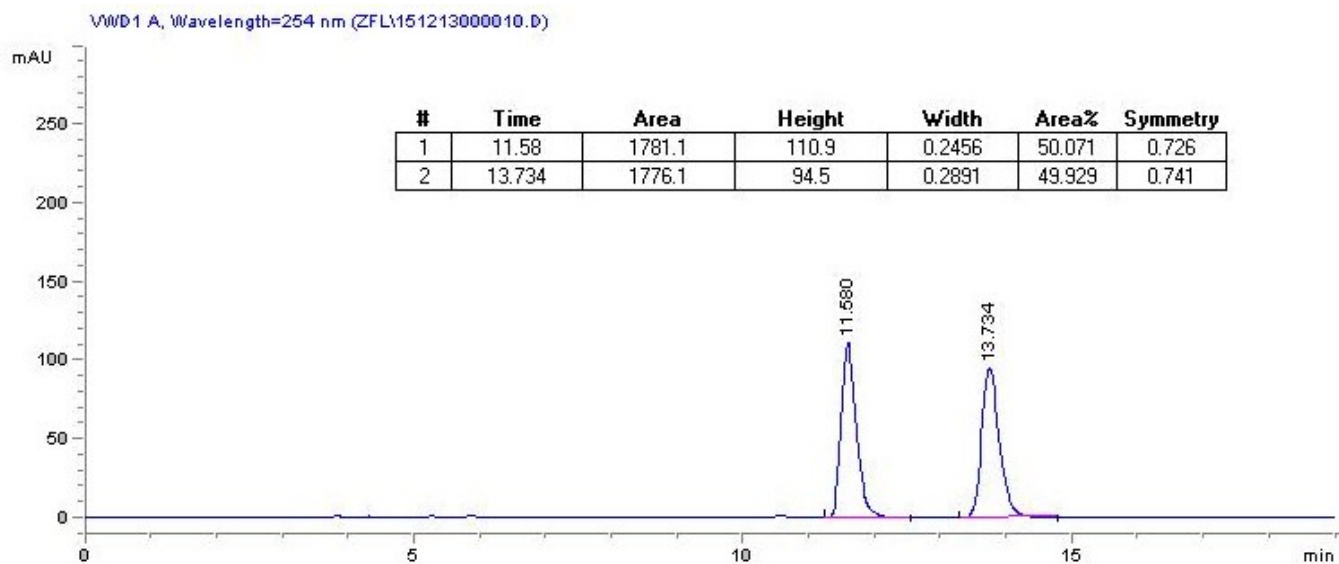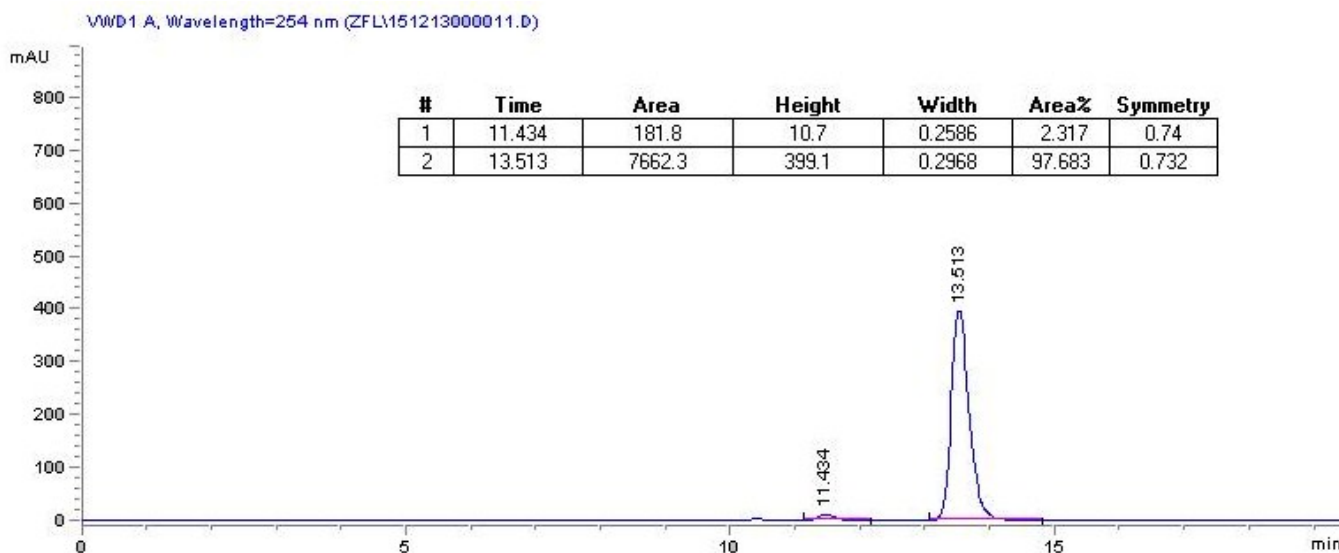

## References

1. J.-B. Zhao, D. A. Clark, *Org. Lett.* **2012**, 14, 1668-1671.
2. C. N. EidJr, J. P. Konopelski, *Tetrahedron* **1991**, 47, 975-992.
3. Y. Zhou, F.-L. Zhu, Z.-T. Liu, X.-M. Zhou, X.-P. Hu, *Org. Lett.* 2016, 18, 2734-2737.

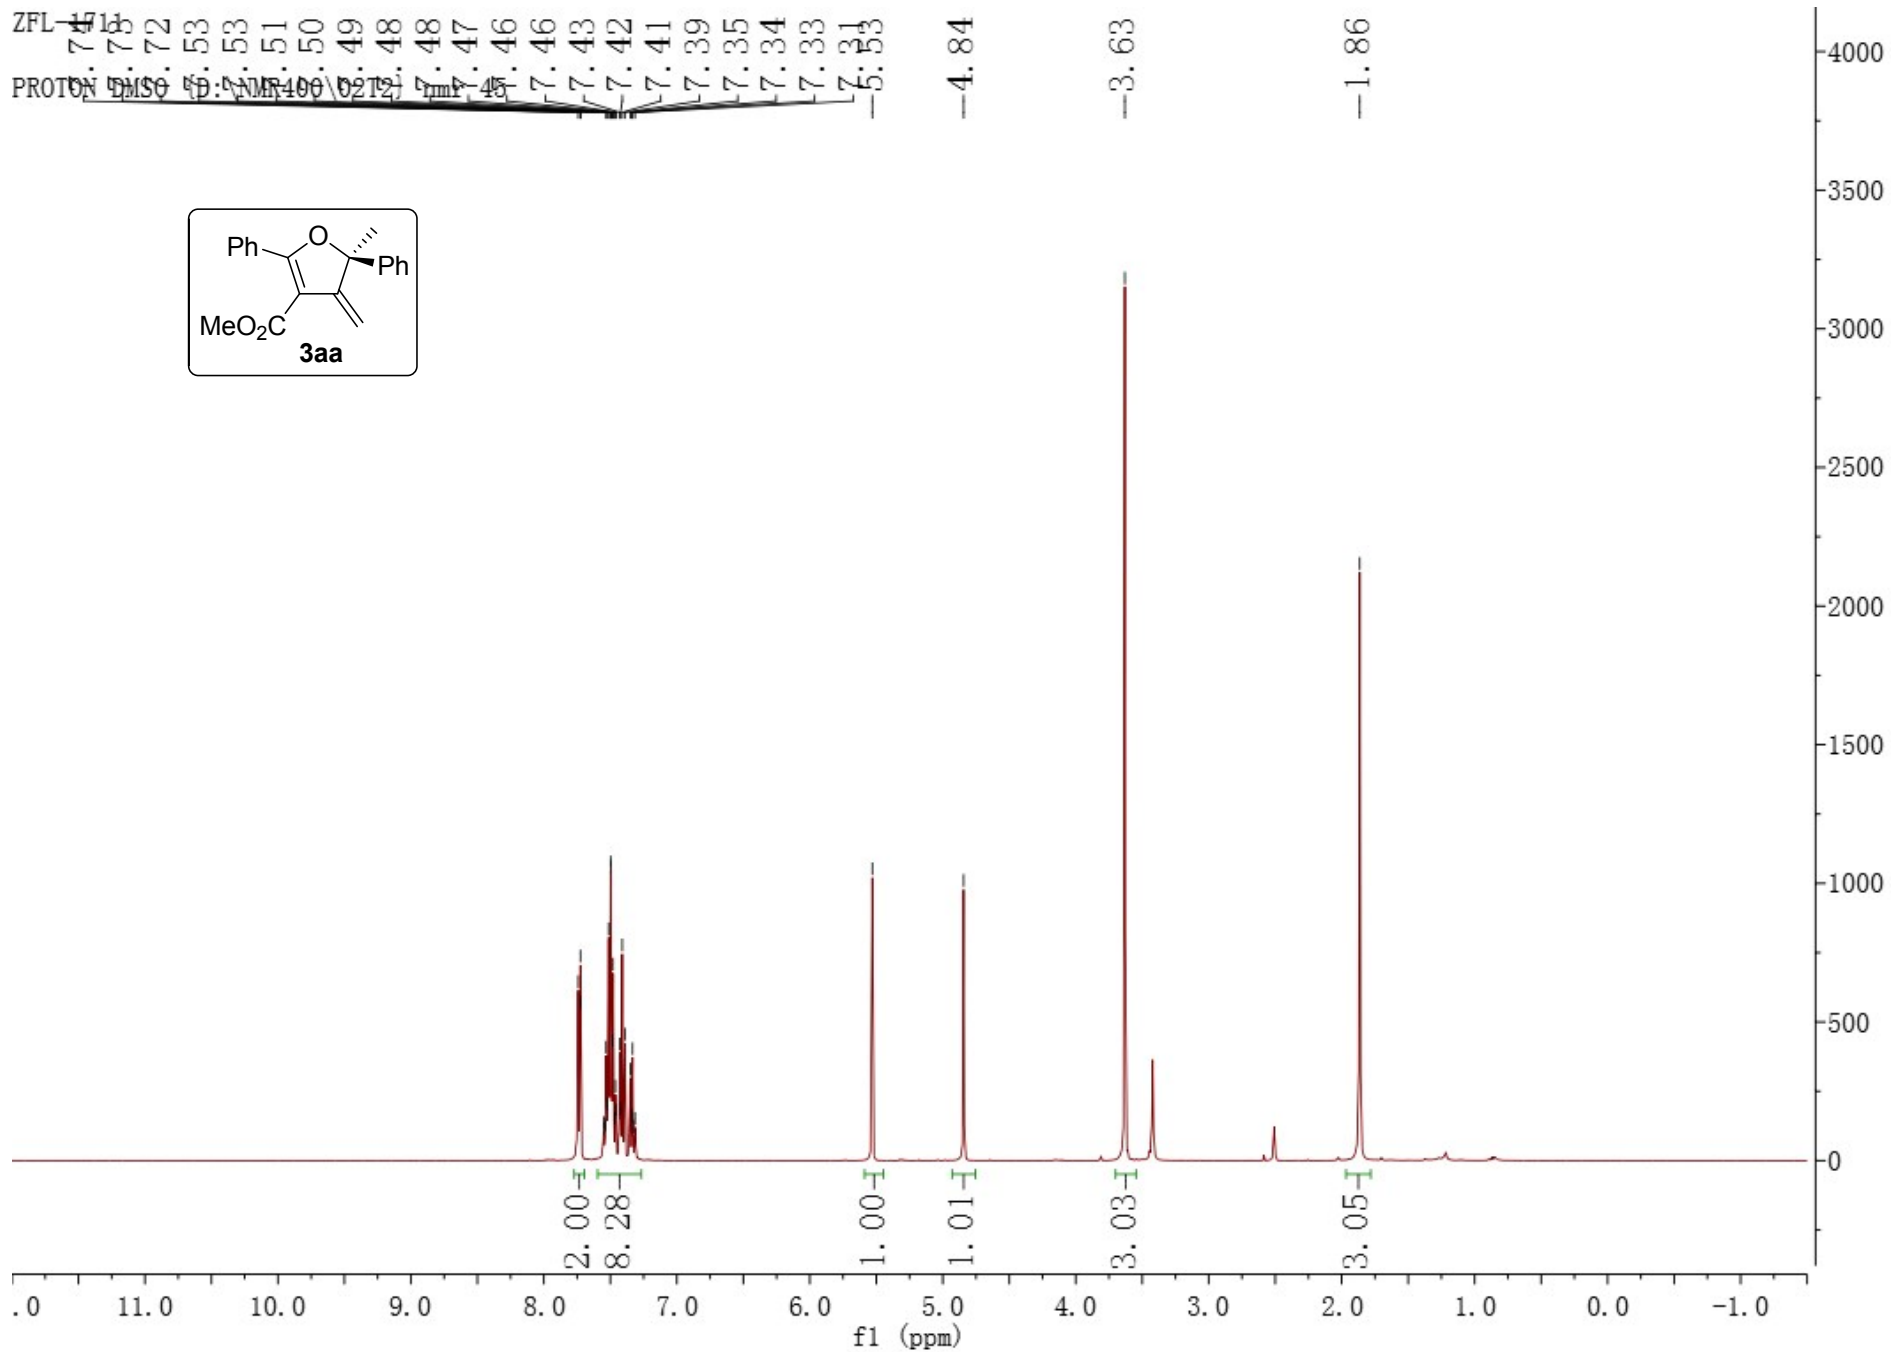

ZFL-1418

ZFL-1418 (DMSO)

C13CPD DMSO {D:\NMR400\0219

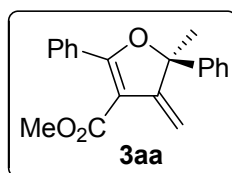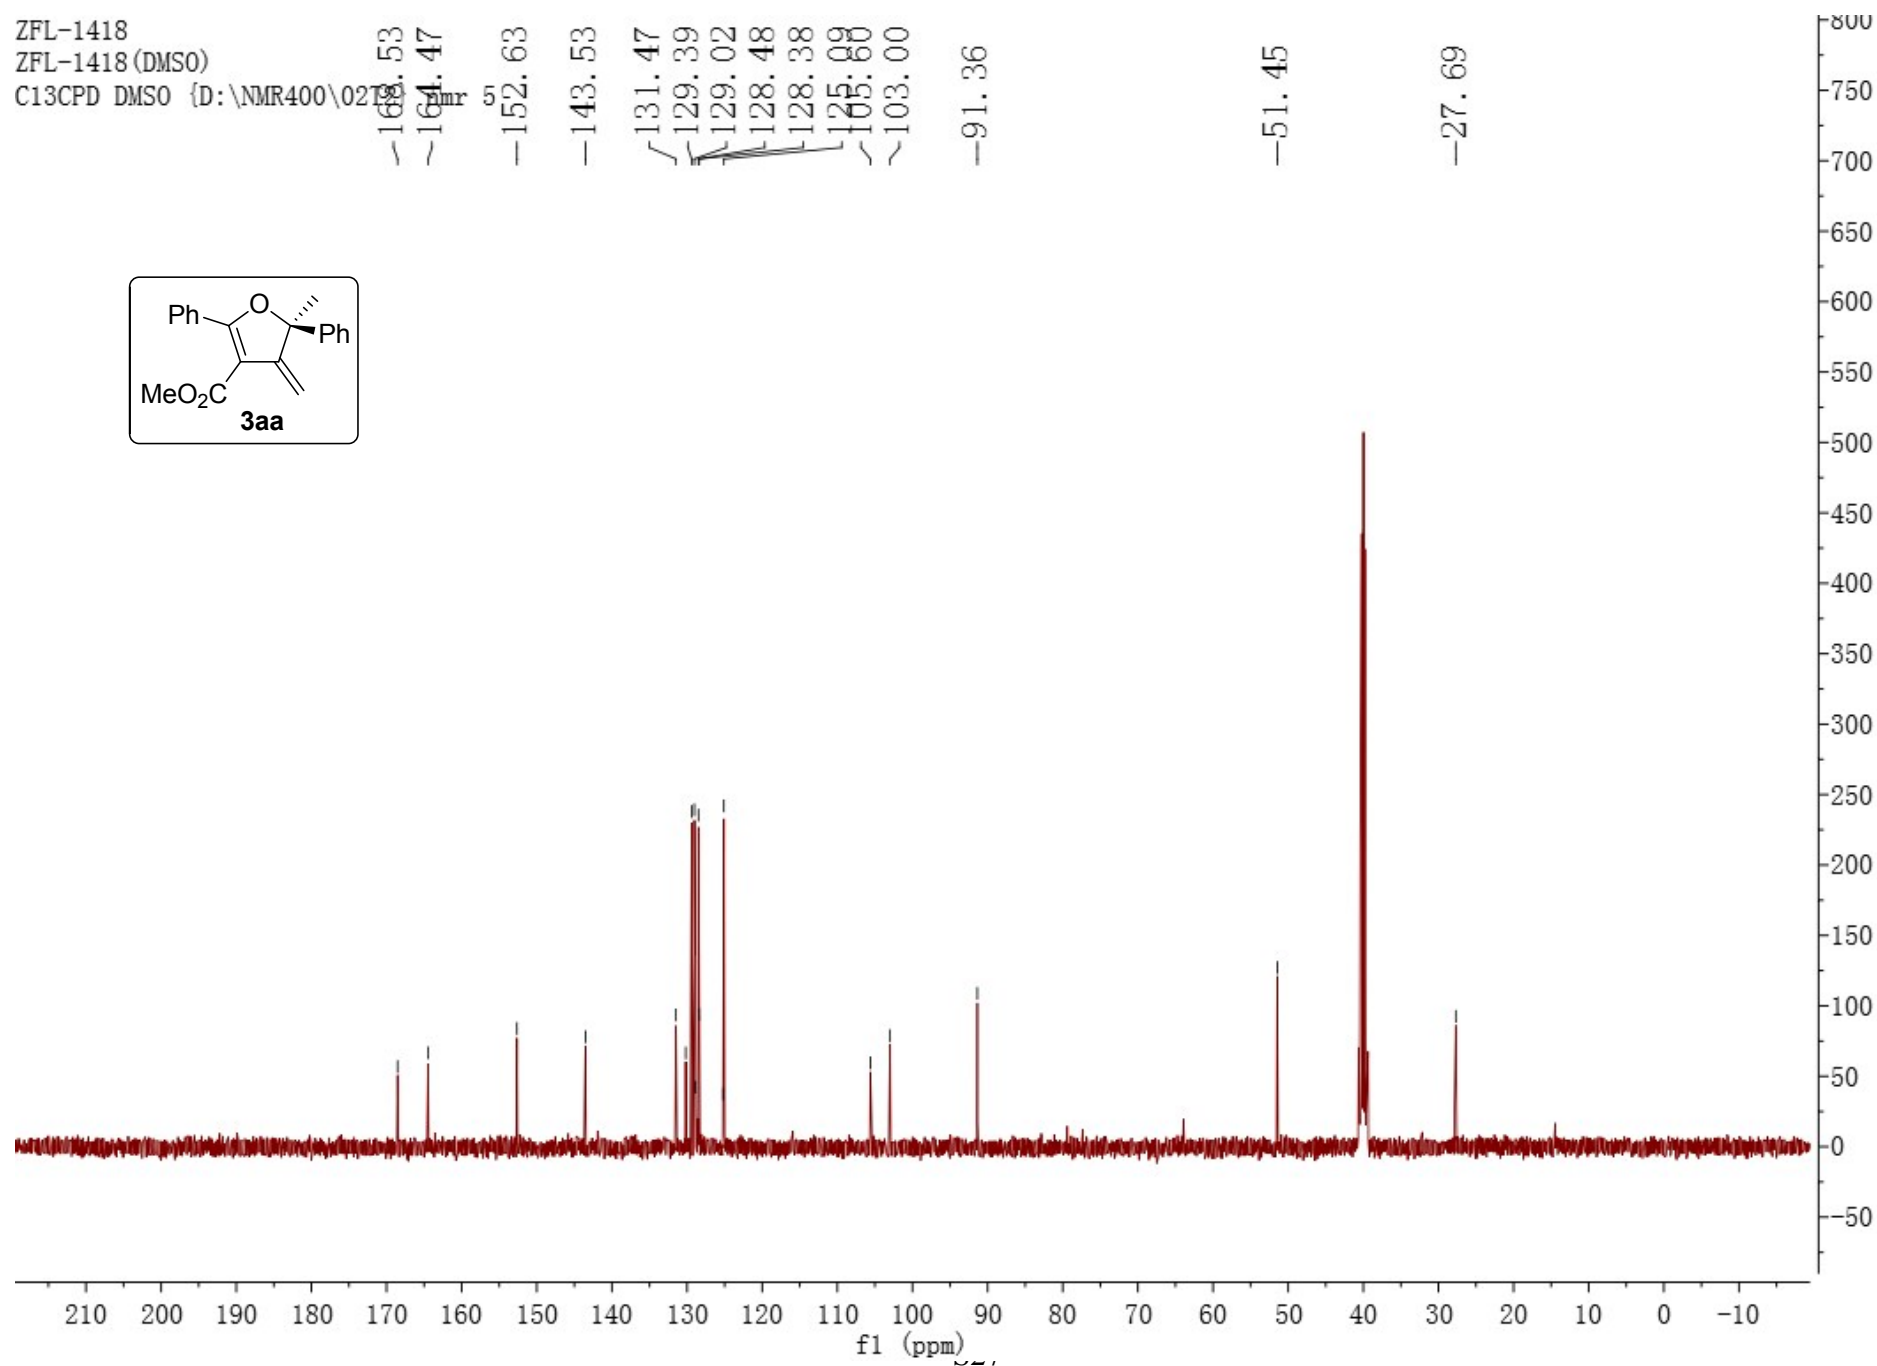

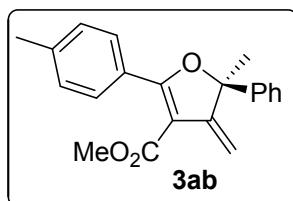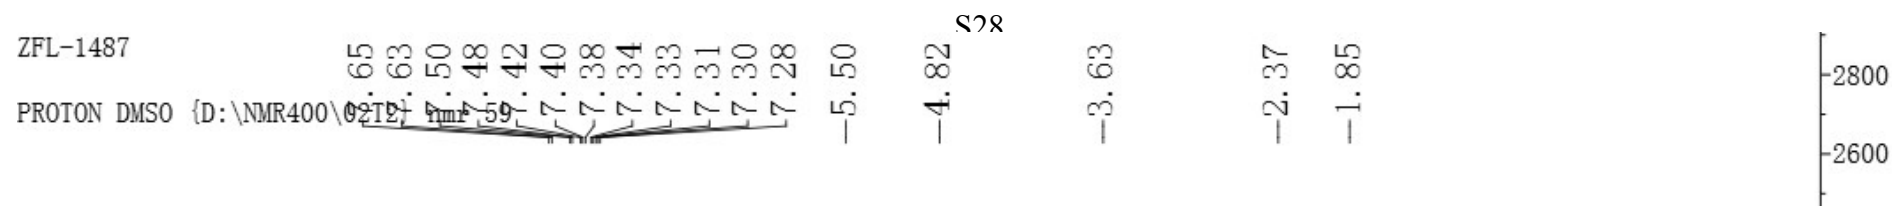

ZFL-1487

C13CPD DMSO {D:\NMR400\0219\}

169.60  
164.58  
152.76  
143.62  
141.53  
129.39  
129.03  
128.99  
128.32  
125.07  
105.08  
102.64

91.13

51.38

27.69

21.56

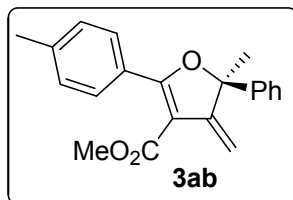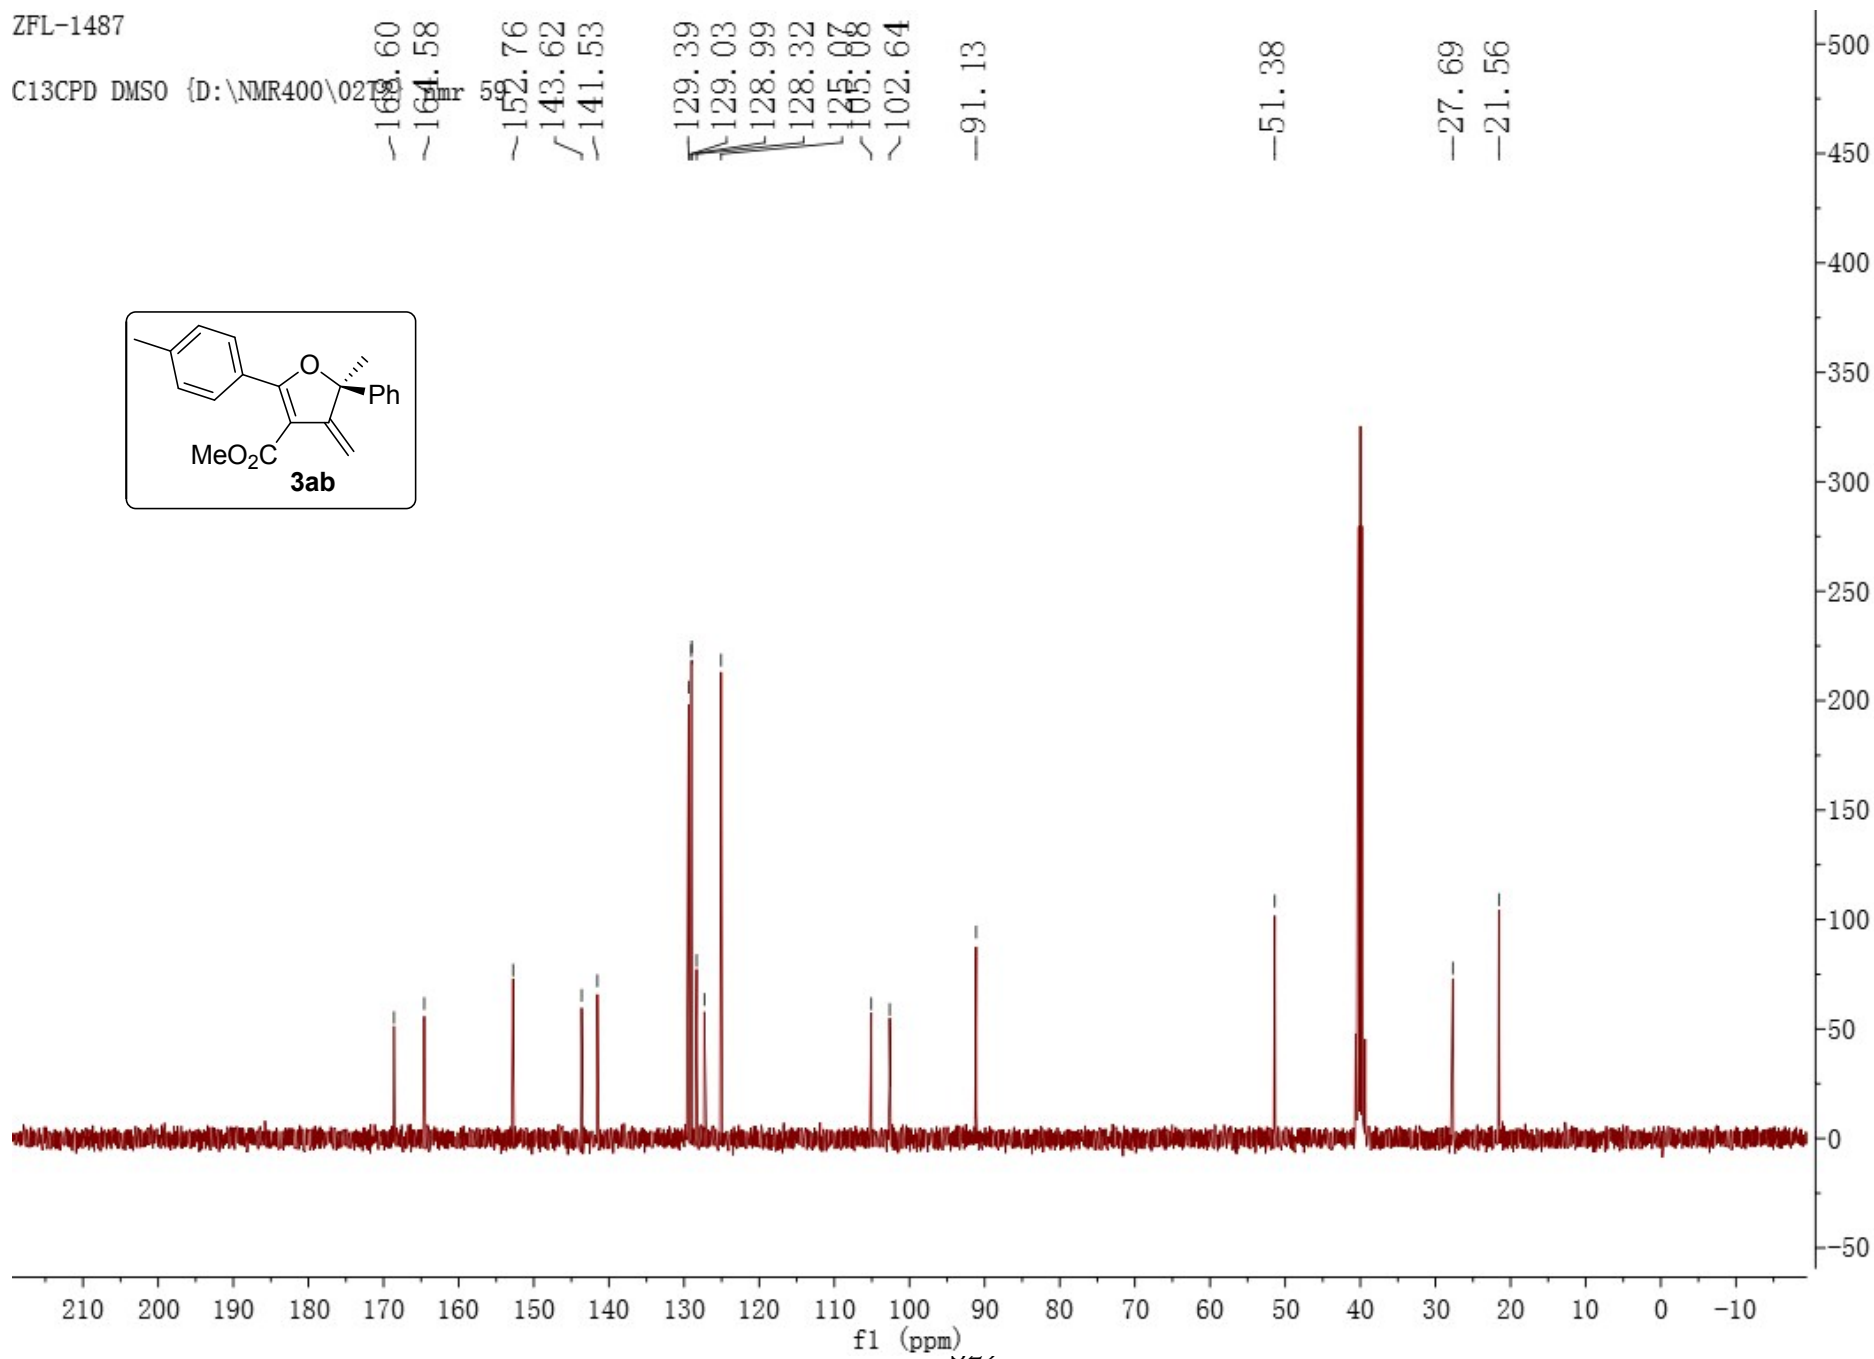





ZFL-1472

C13CPD DMSO {D:\NMR400\02T2

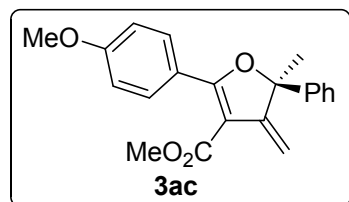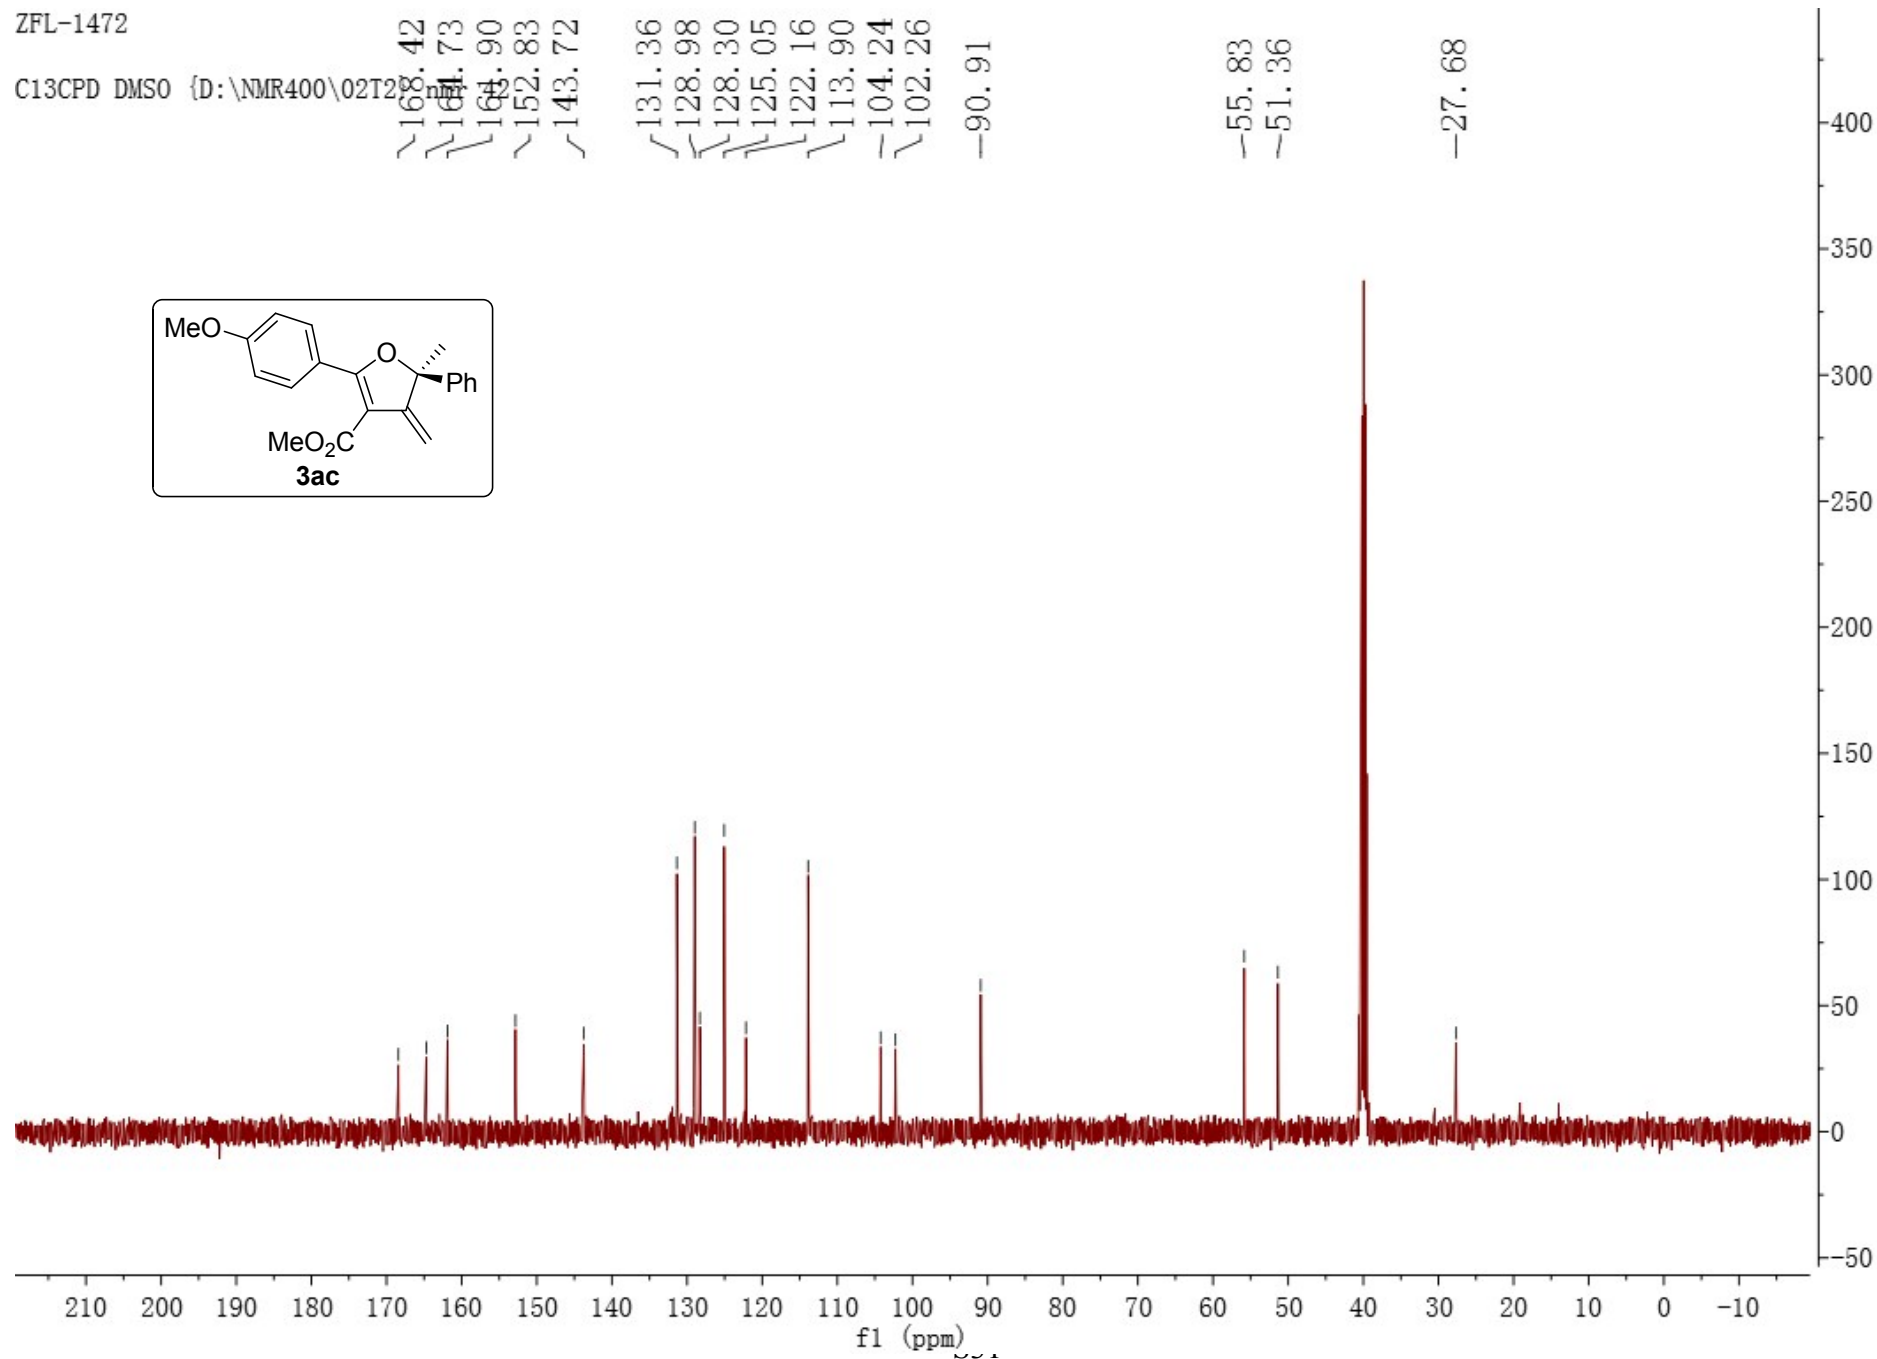

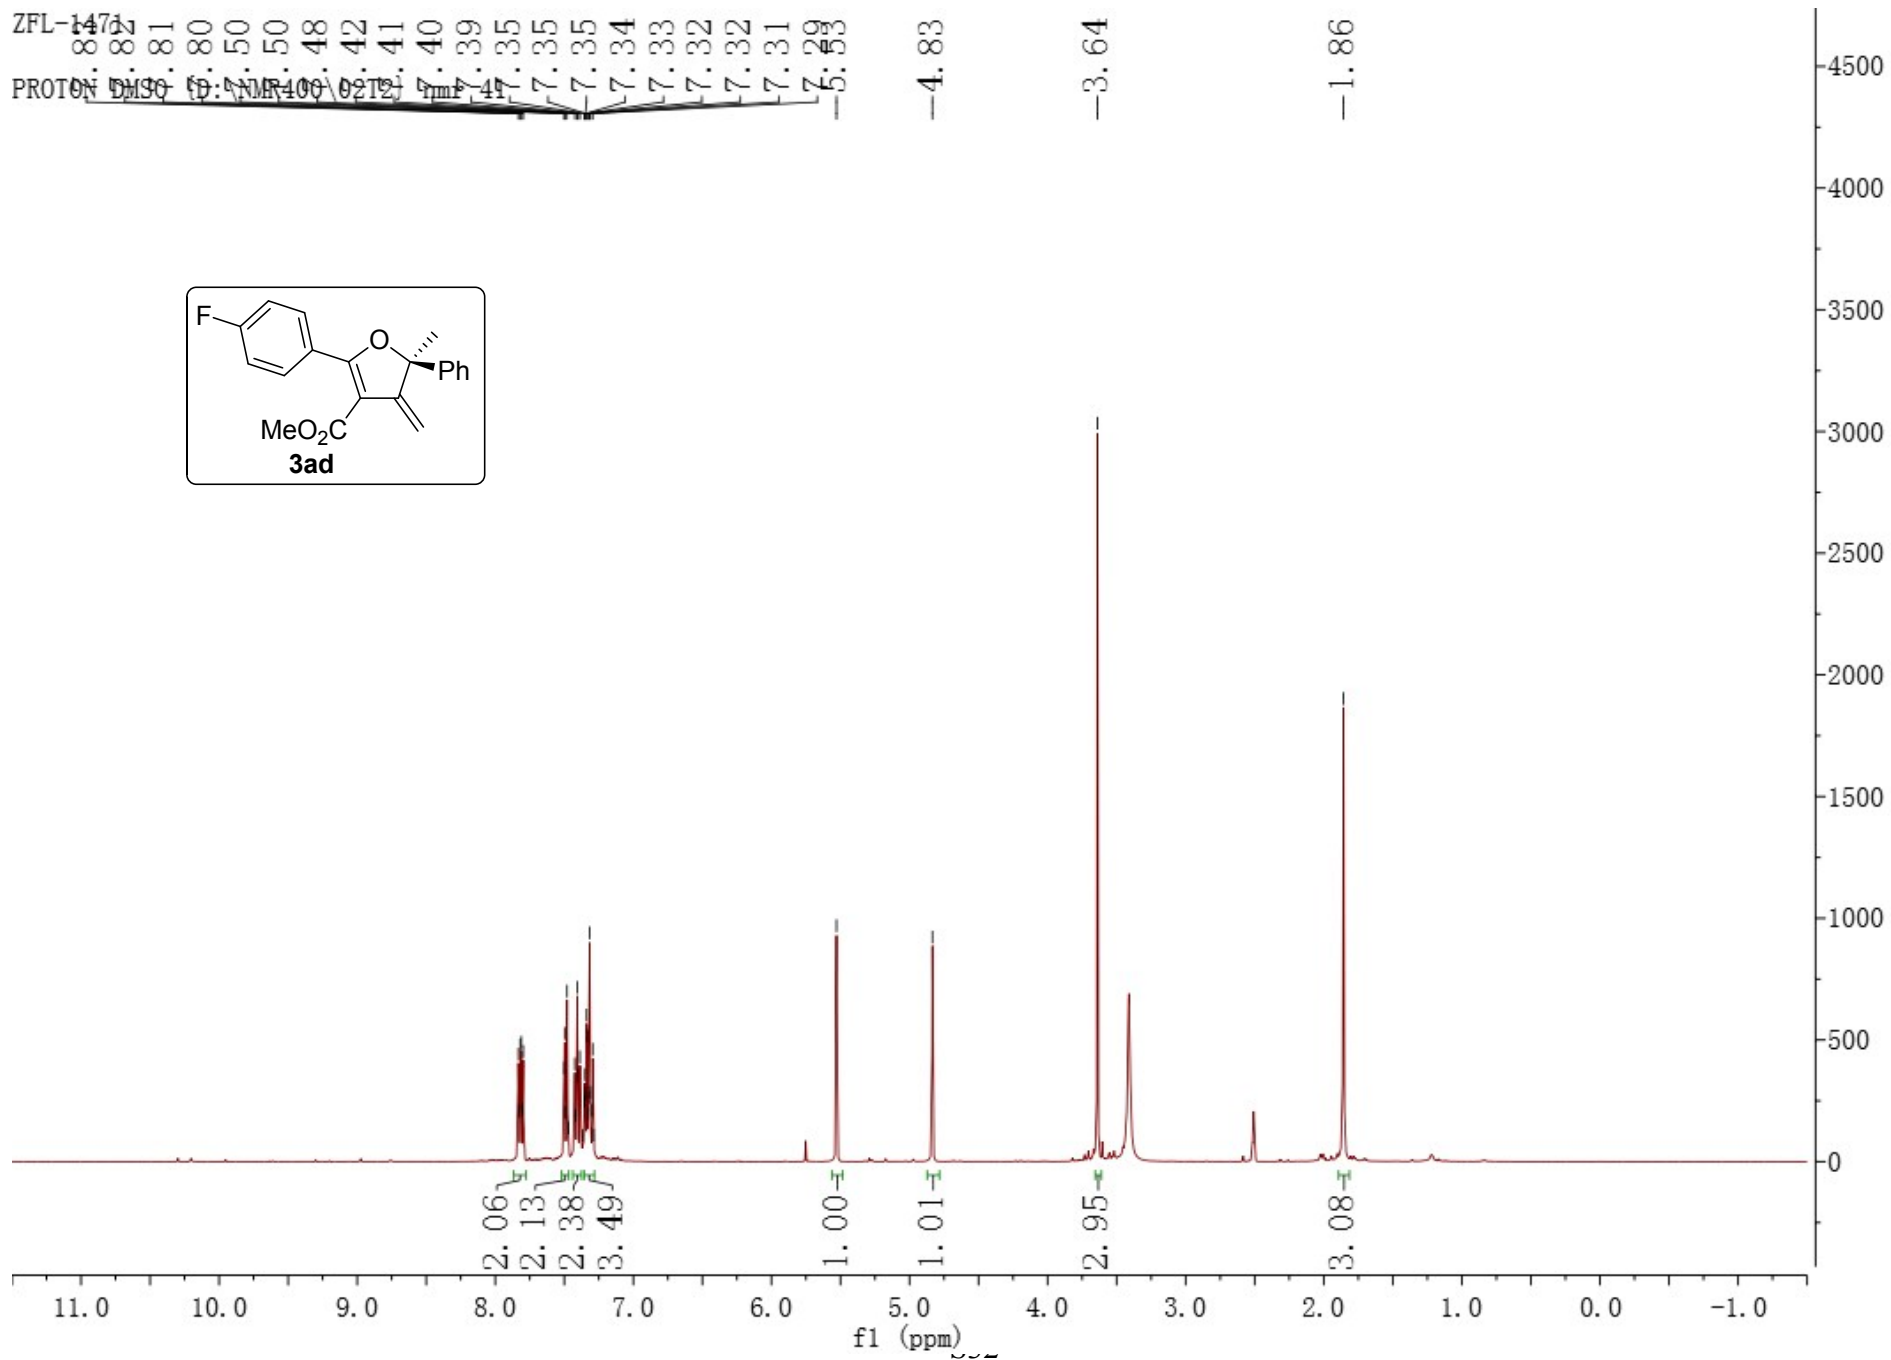

ZFL-1471

C13CPD DMSO

{D:\NMR400\02T9

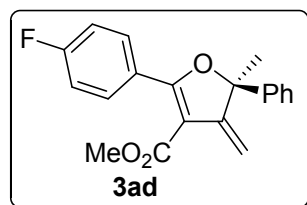

164.61  
164.38  
152.45  
143.44  
132.16  
132.07  
129.01  
128.39  
125.11  
115.70  
115.48  
105.56  
103.24  
91.46

-51.46

-27.65

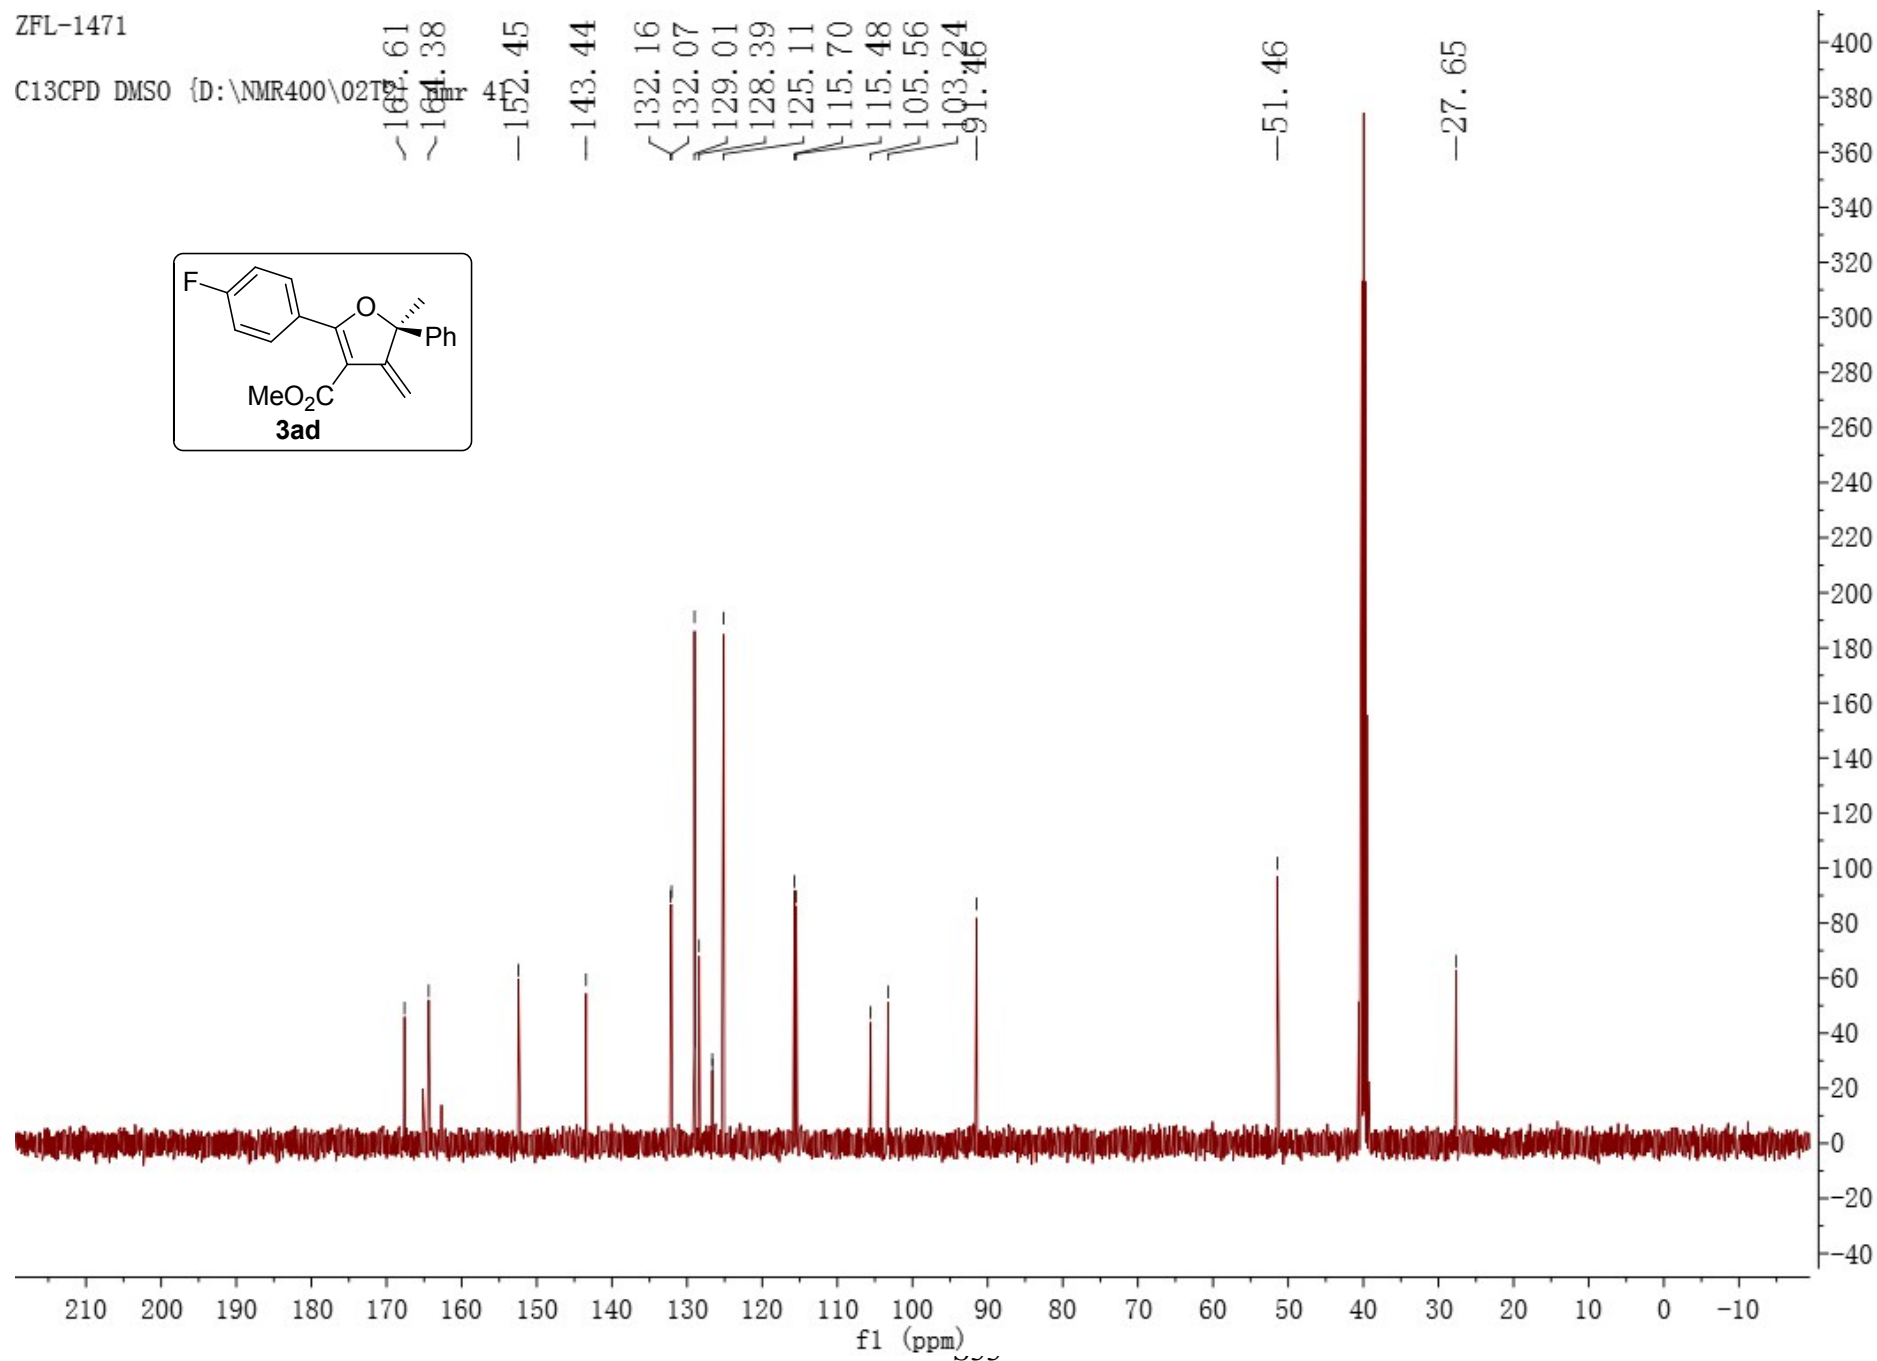

ZFL-1469

PROTON DMSO {D:\NMR400\0212

7.77  
7.75  
7.56  
7.45  
7.45  
7.49  
7.48  
7.42  
7.41  
7.39  
7.35  
7.33  
7.32  
-5.54  
-4.85  
-3.64  
-1.86

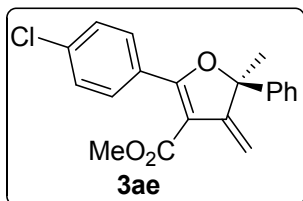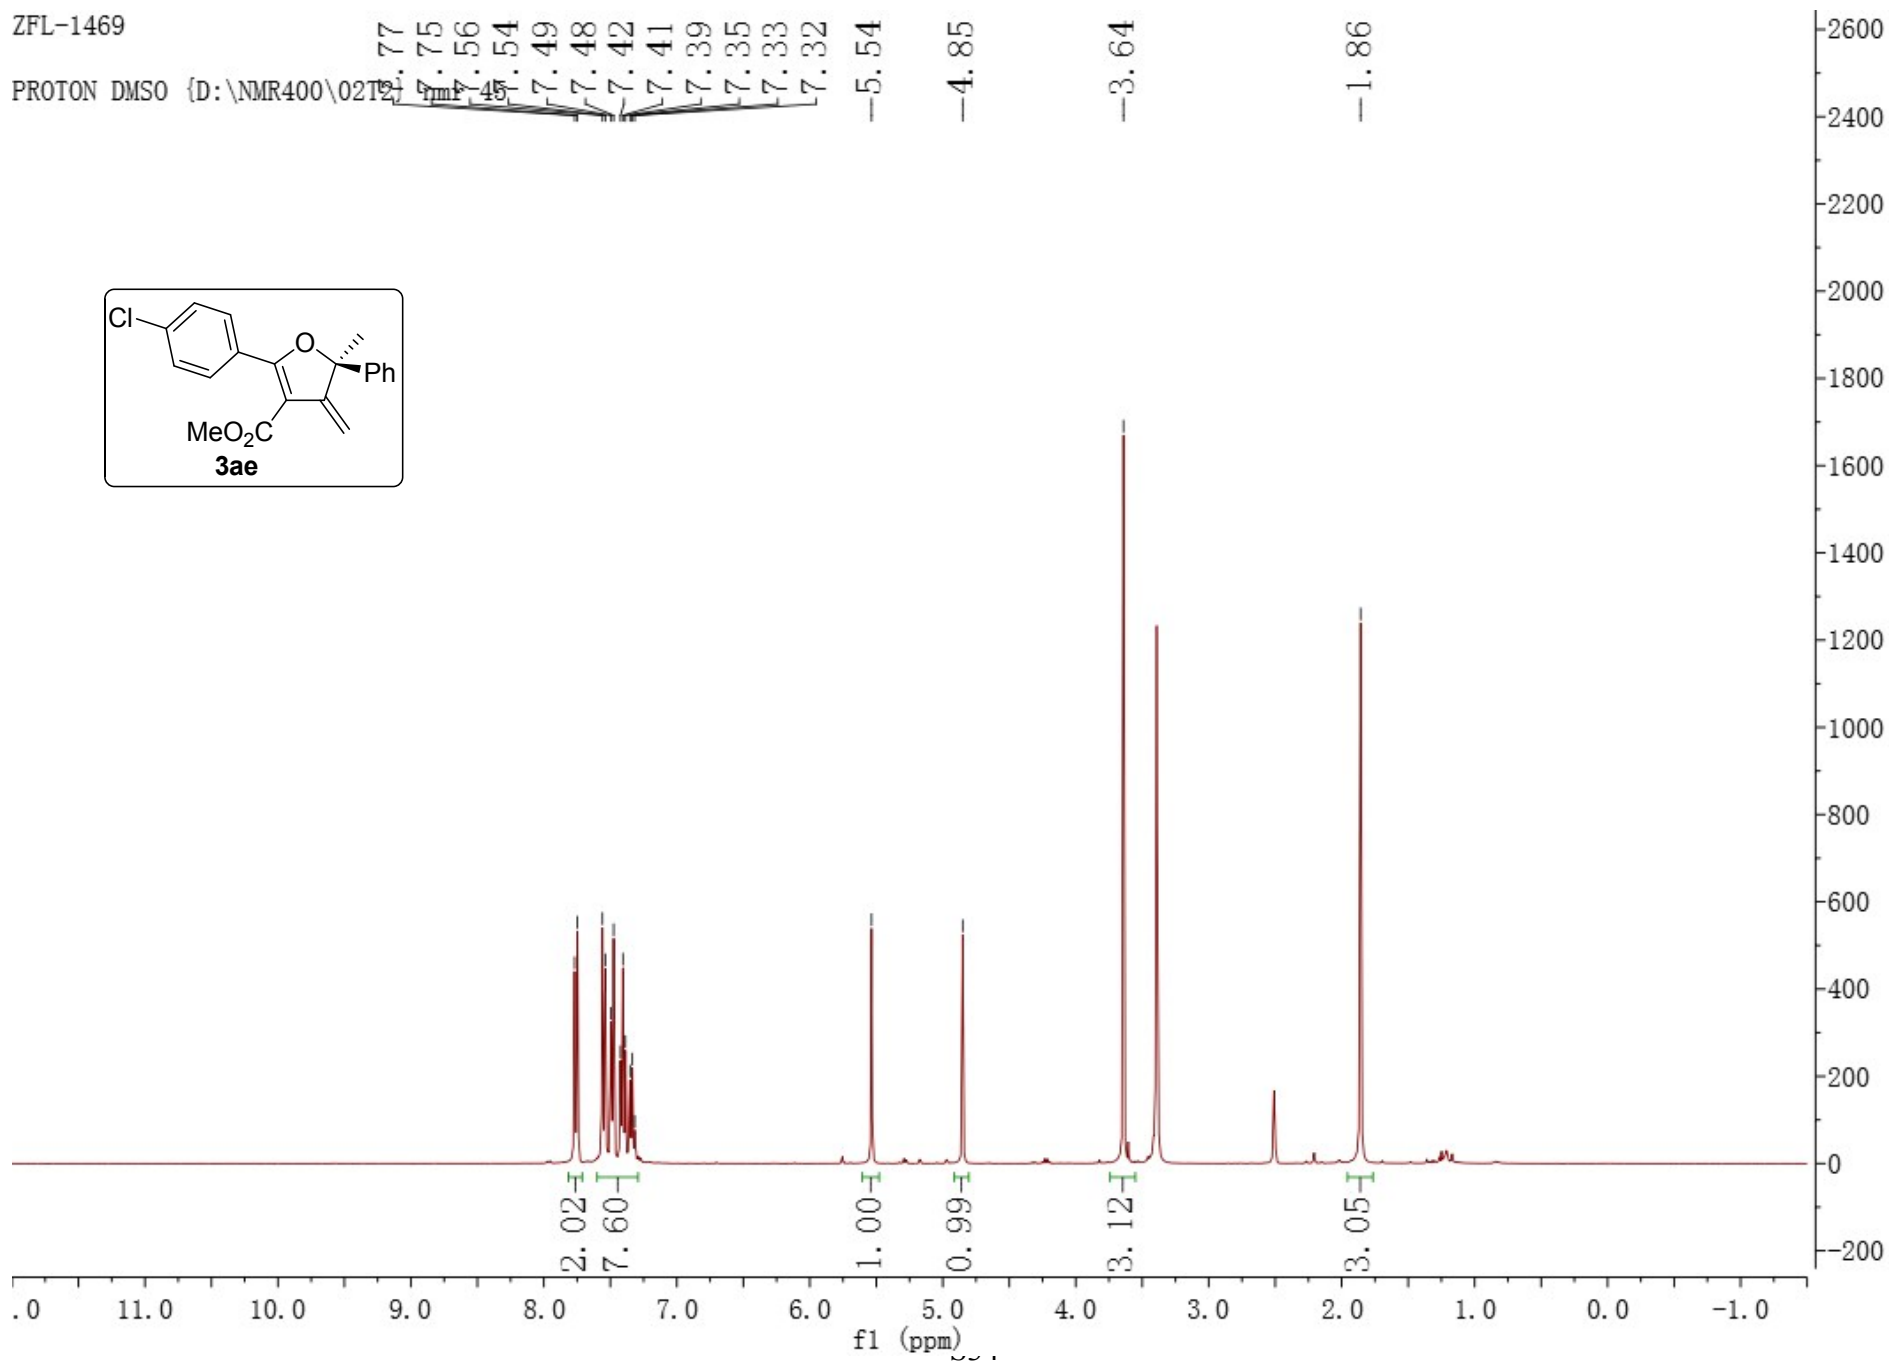

ZFL-1469

C13CPD DMSO {D:\NMR400\02T9

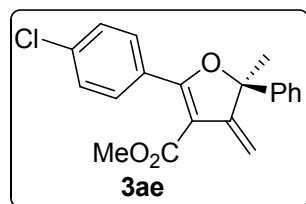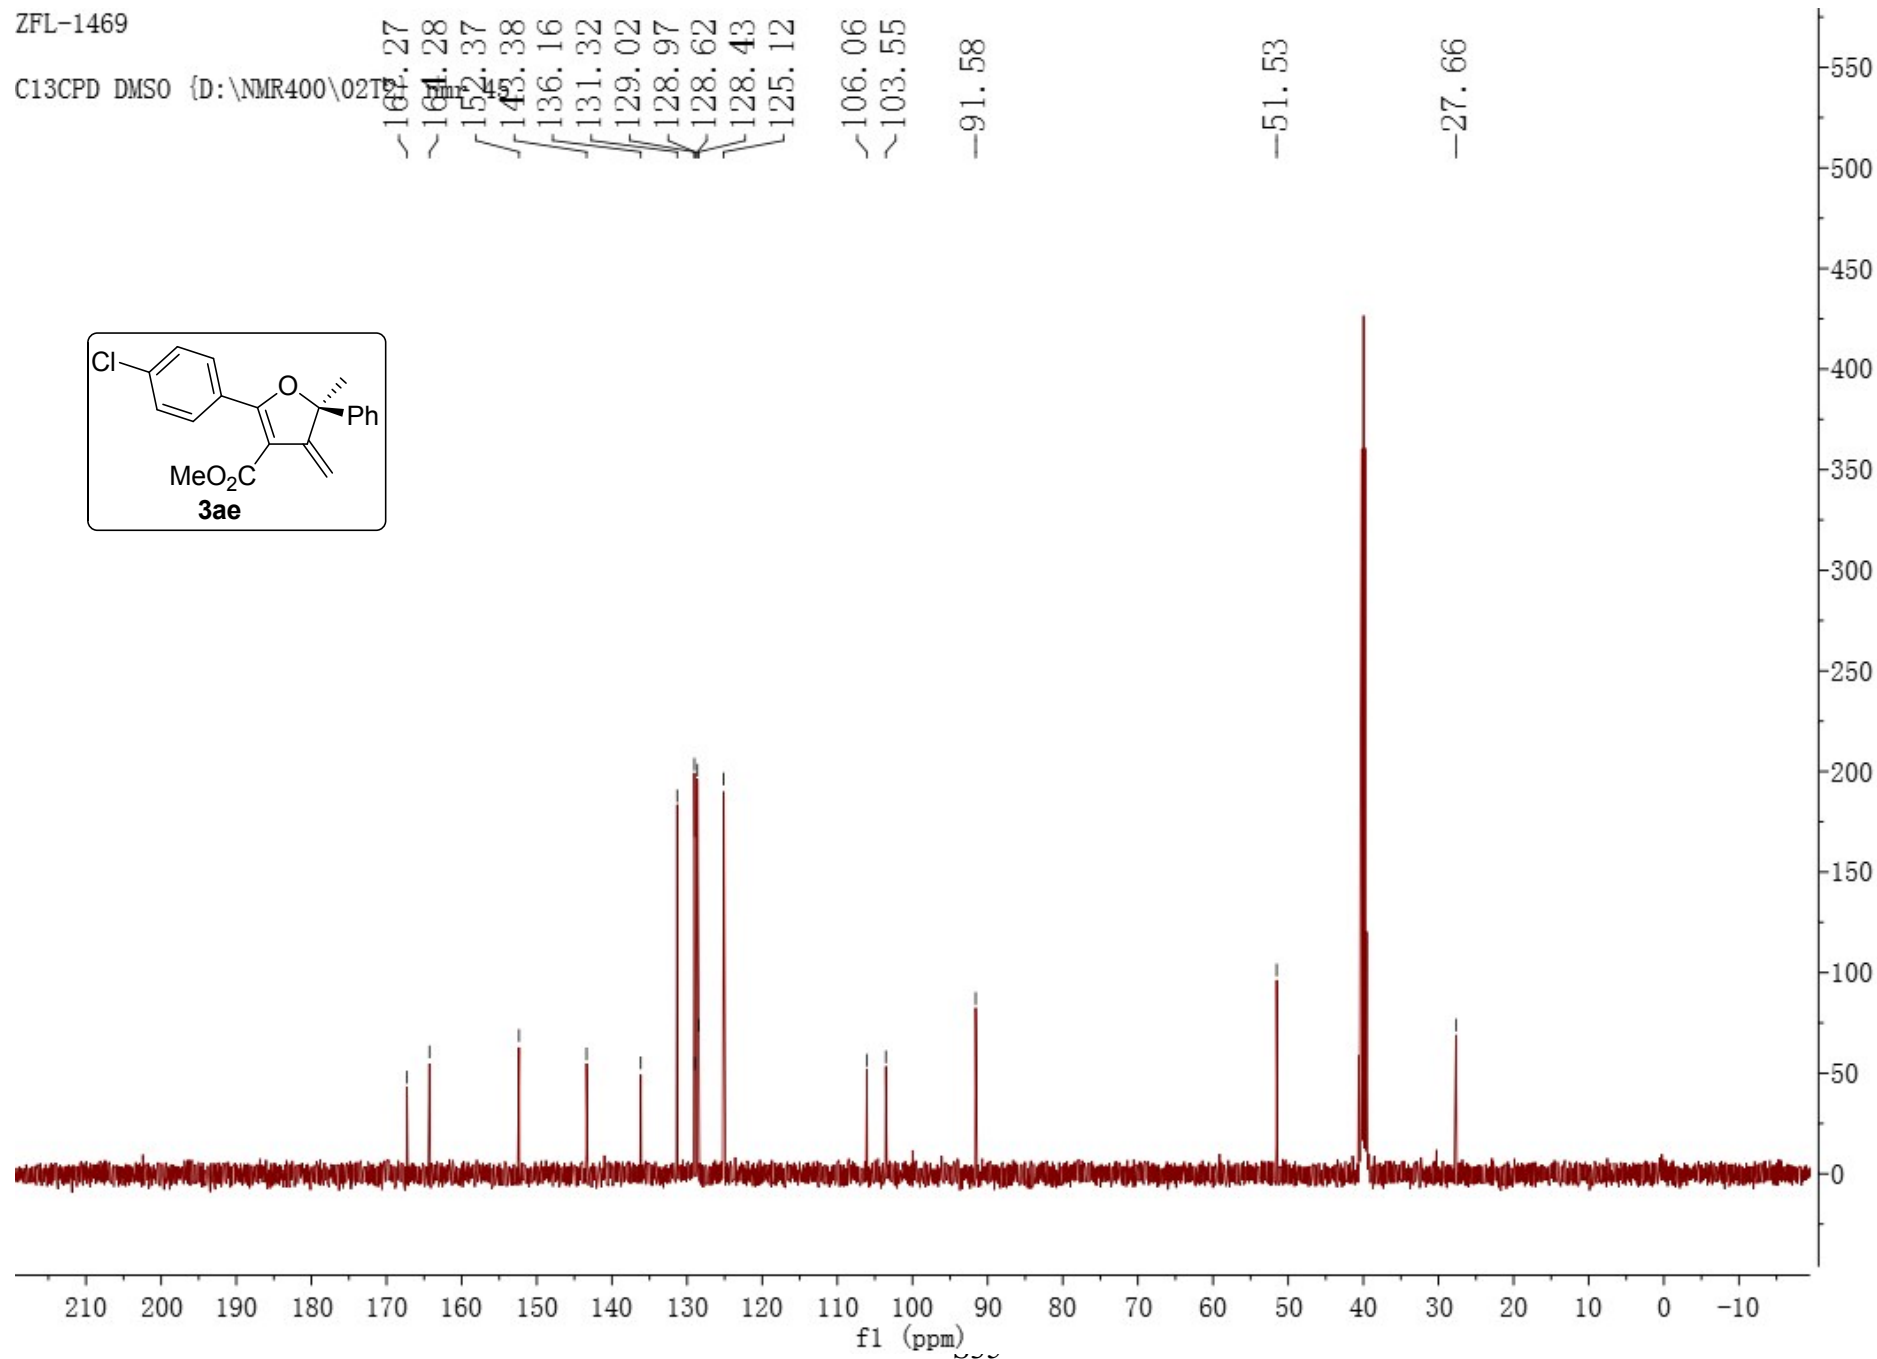

ZFL-1488

79.78  
77.77  
77.68  
77.60  
77.60  
77.58  
77.58  
77.58  
77.52

ZFL-1488

PROTON DMSO {D:\NMR400\0212} 1H  
13C CPD DMSO {D:\NMR400\0212} 13C

~168.84  
~164.18  
~152.24  
133.19  
131.22  
130.41  
129.03  
129.02  
128.43  
128.14  
125.17  
106.52  
103.88

-91.75

-51.55

-27.63

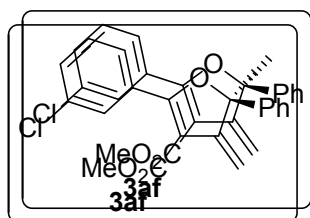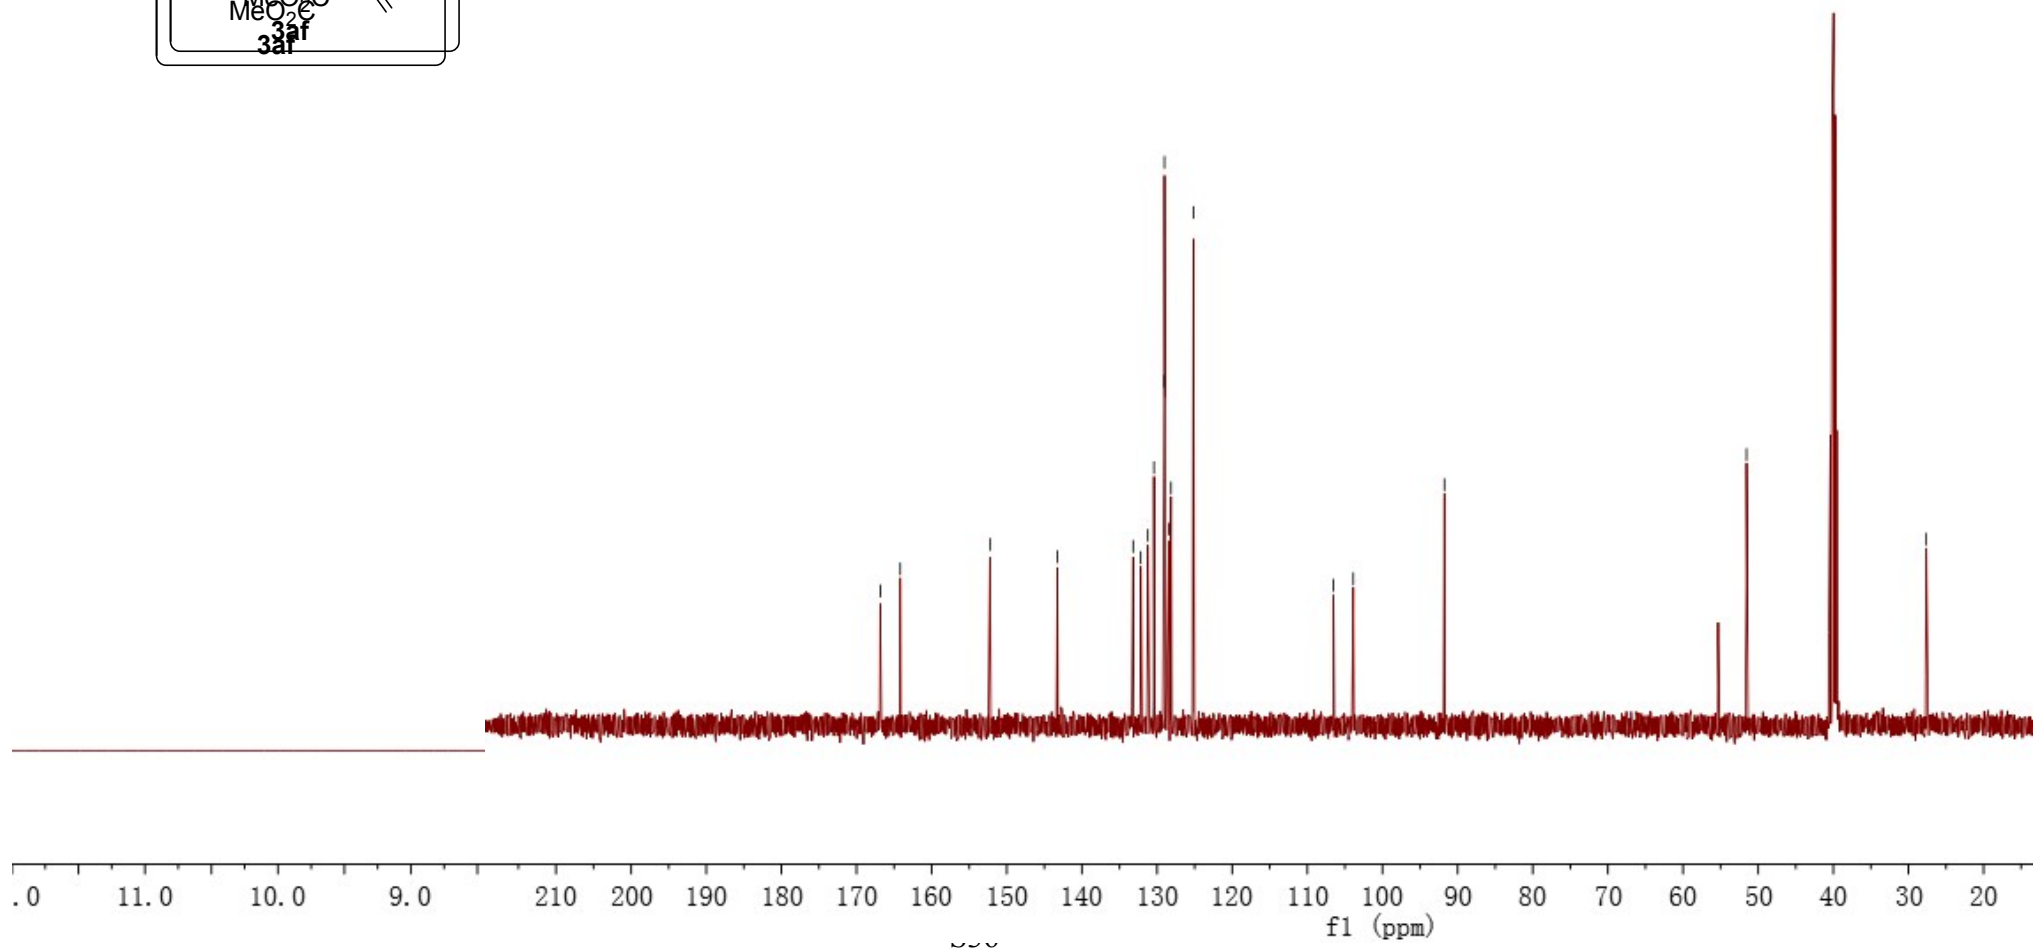





ZFL-1489

C13CPD DMSO

{D:\NMR400\02T2

164.69  
163.66  
151.67  
142.94  
132.13  
131.15  
129.85  
128.98  
127.52  
125.44  
108.22  
103.51

92.90

51.42

27.58

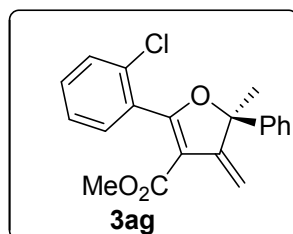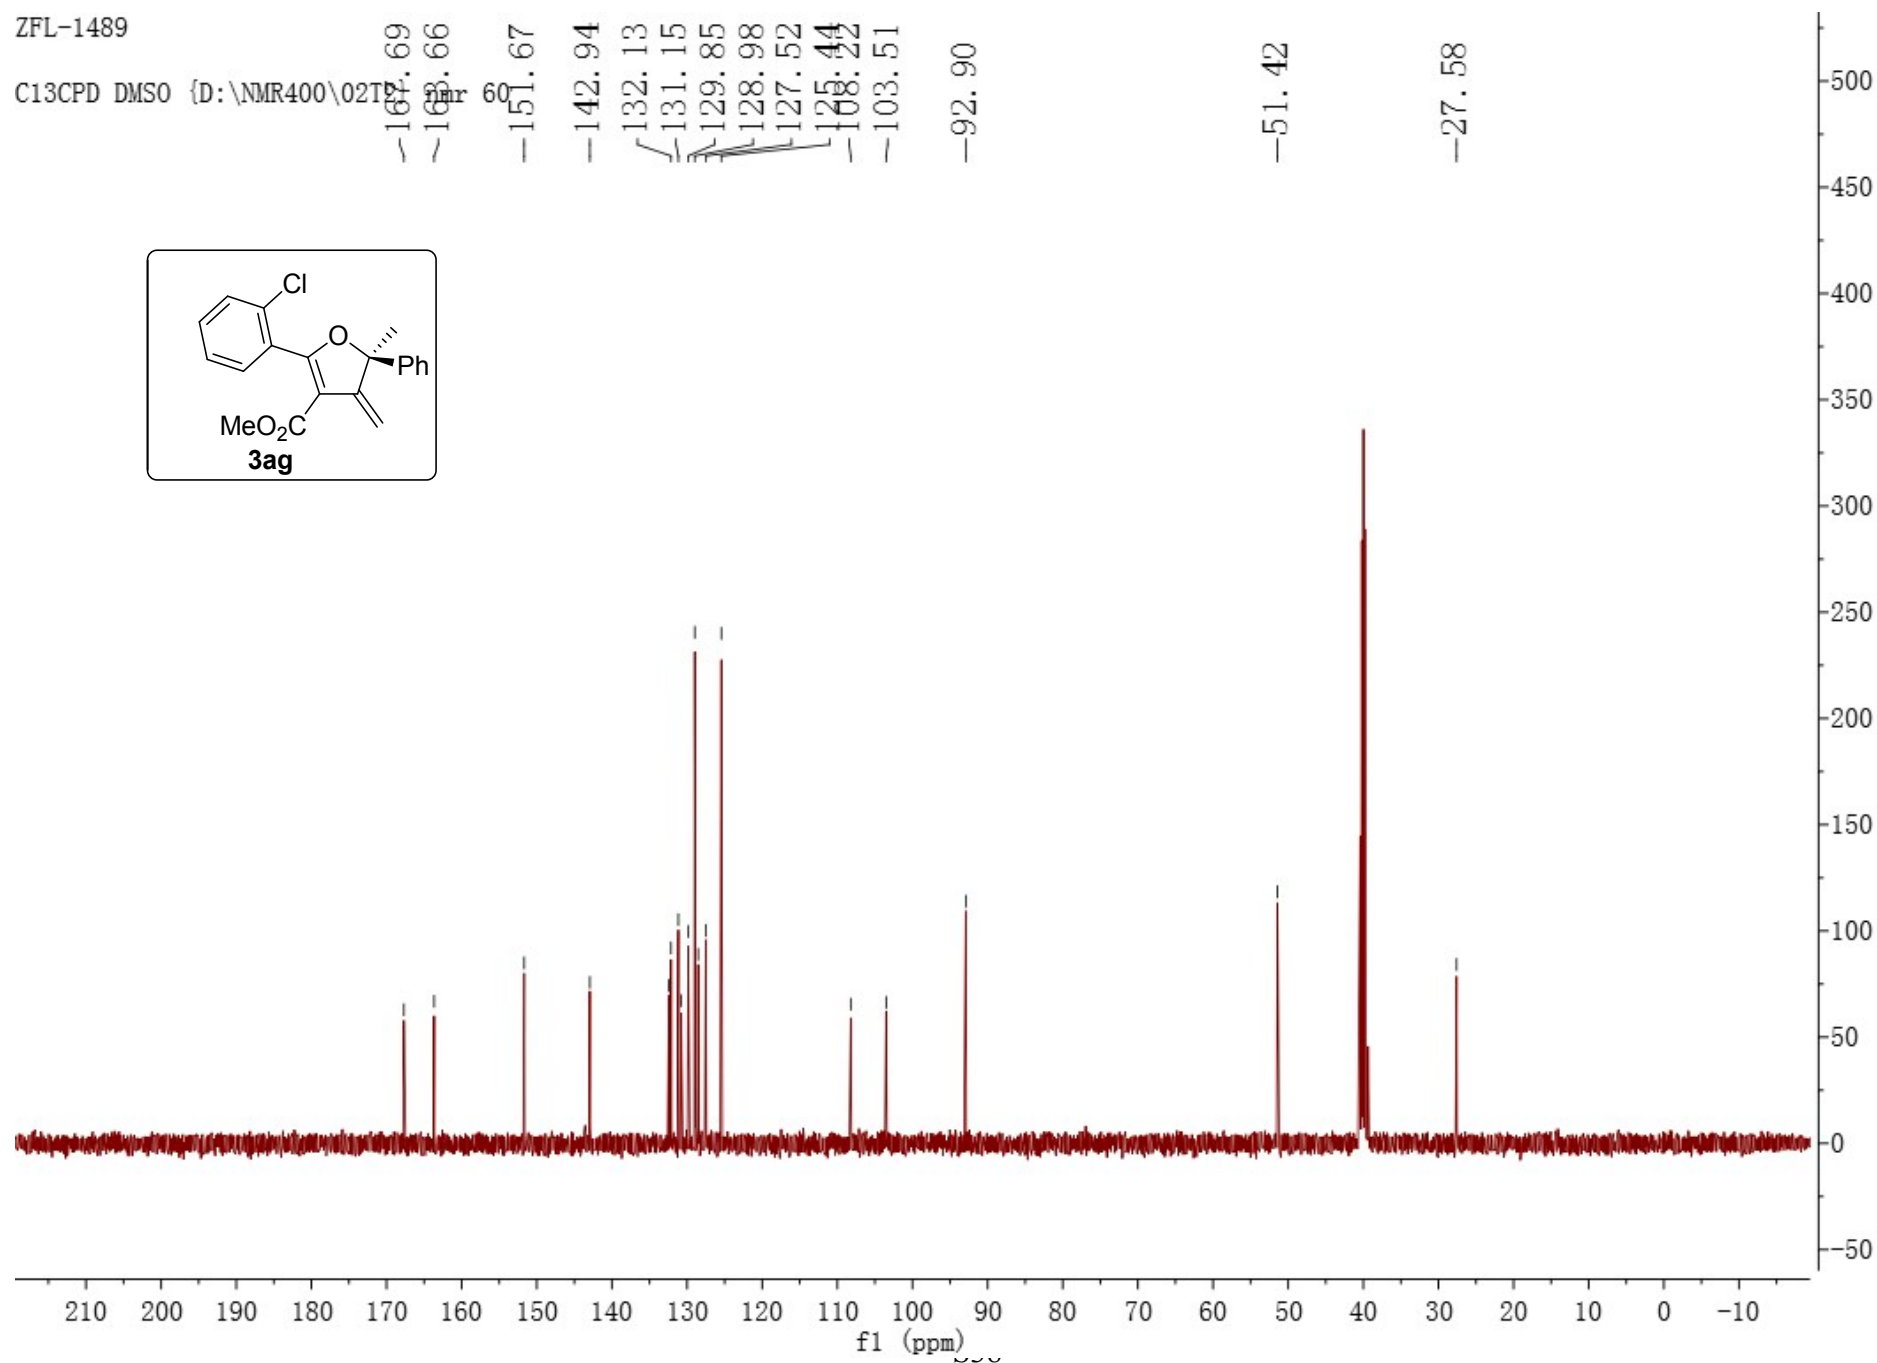



ZFL-1509

C13CPD DMSO {D:\NMR400\0219

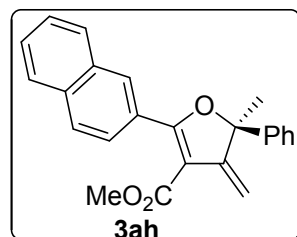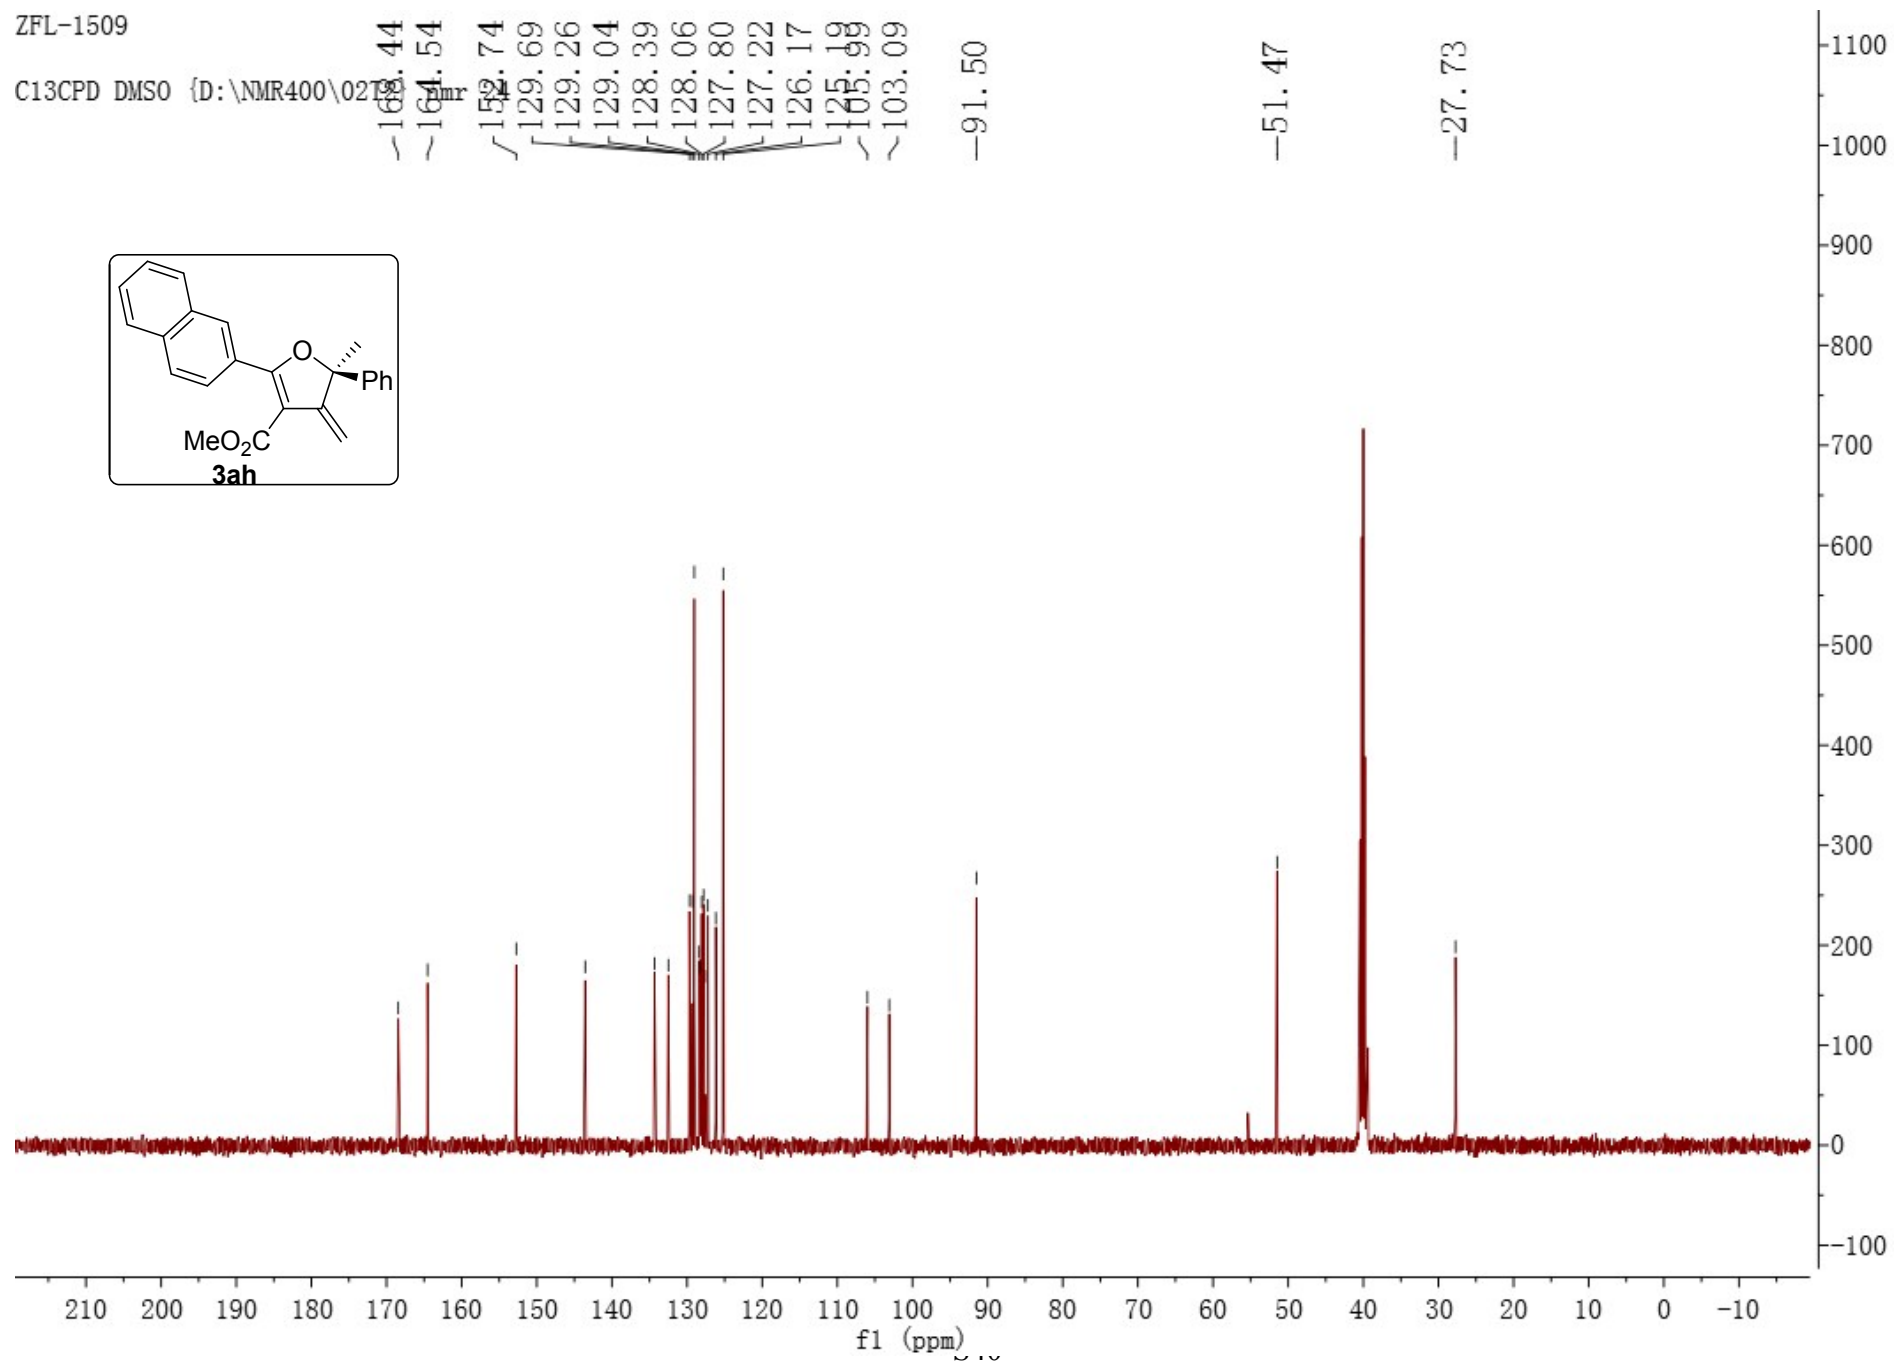

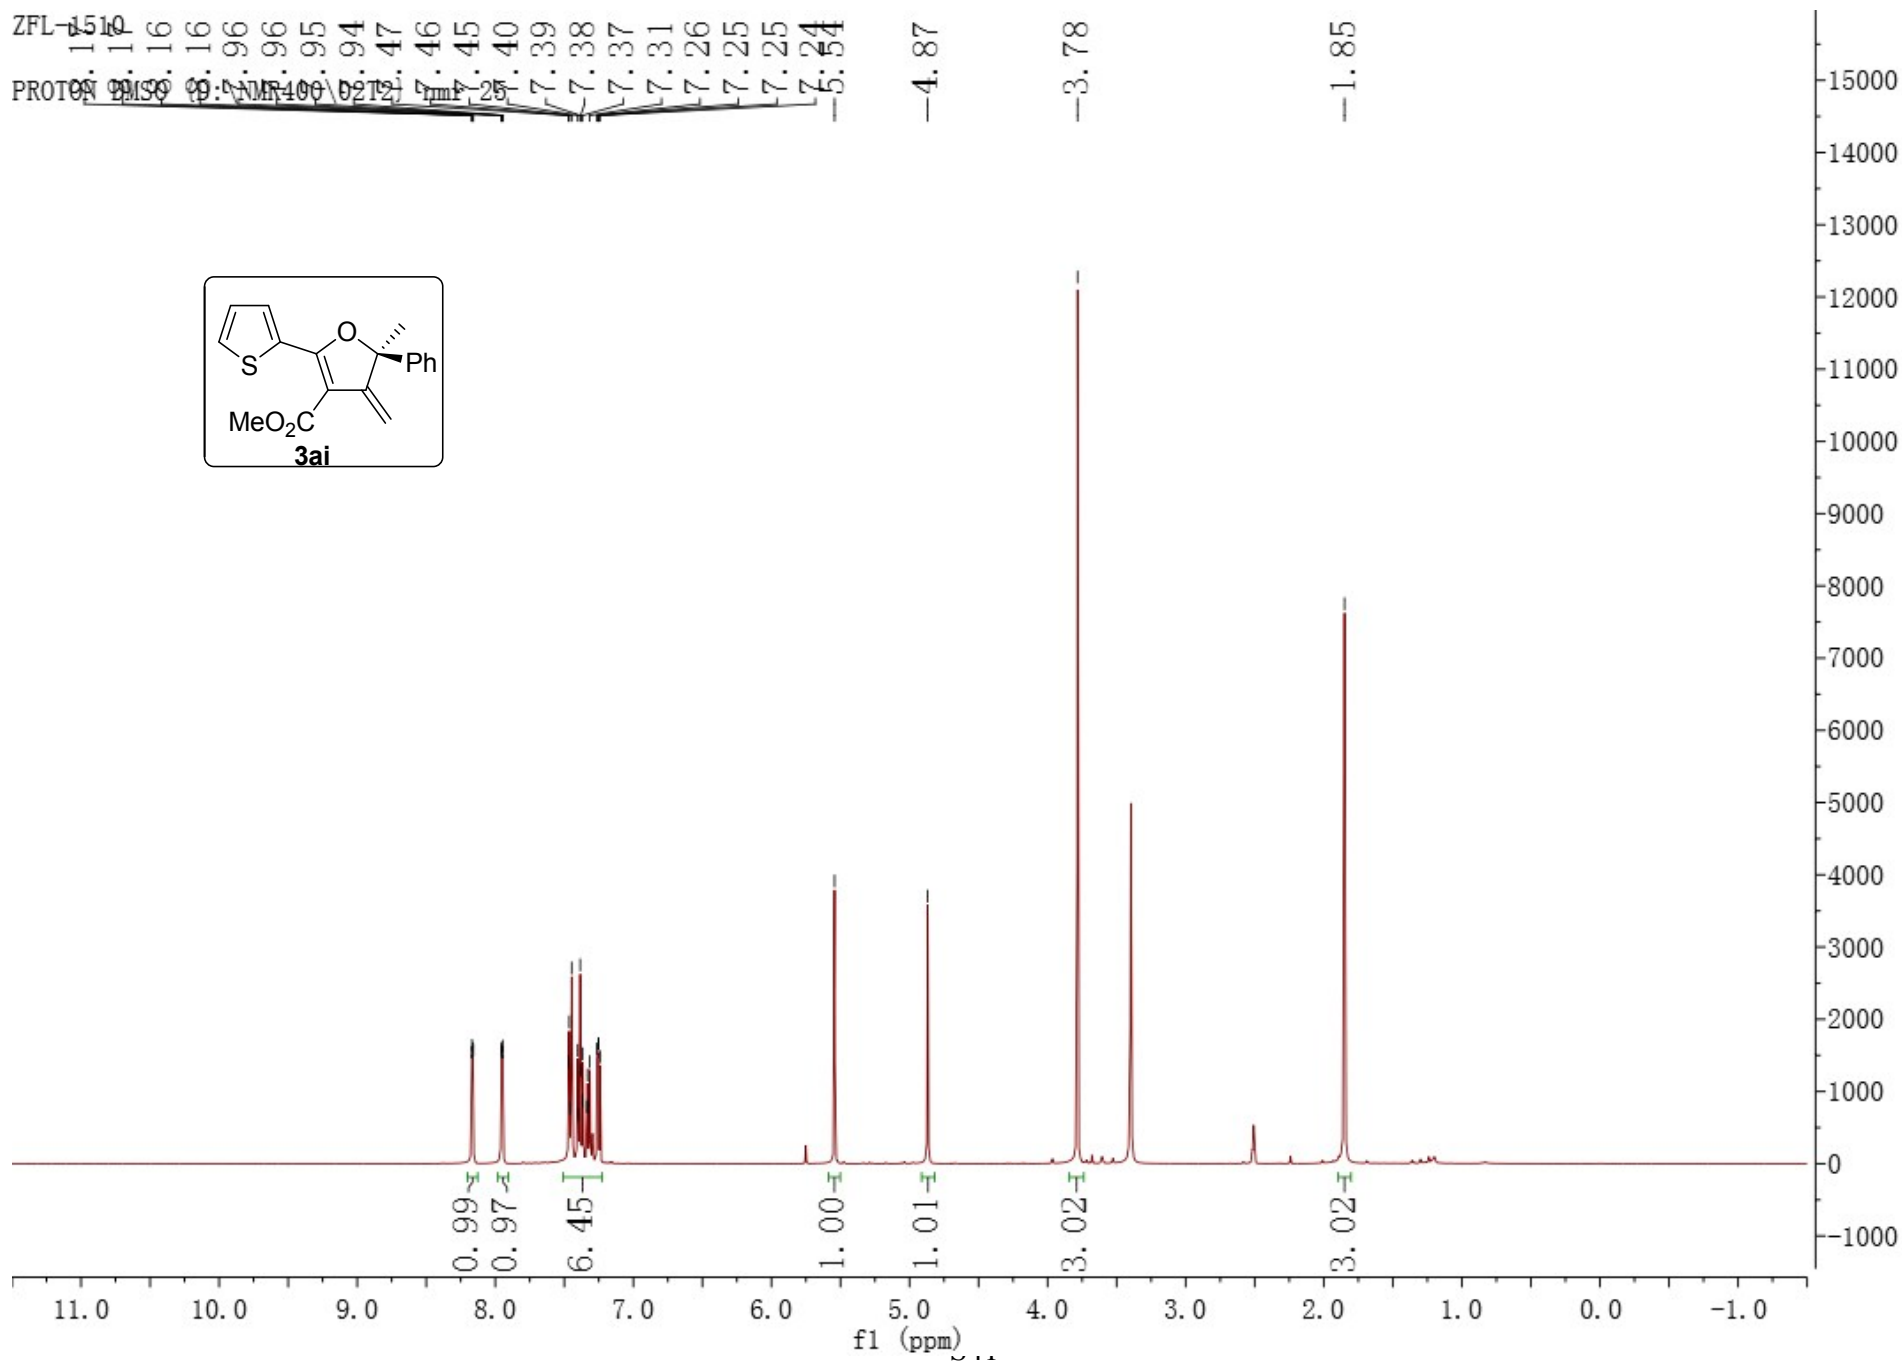

ZFL-1510

C13CPD DMSO {D:\NMR400\0212\}

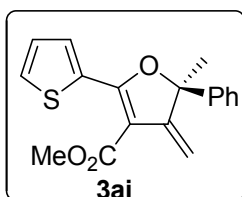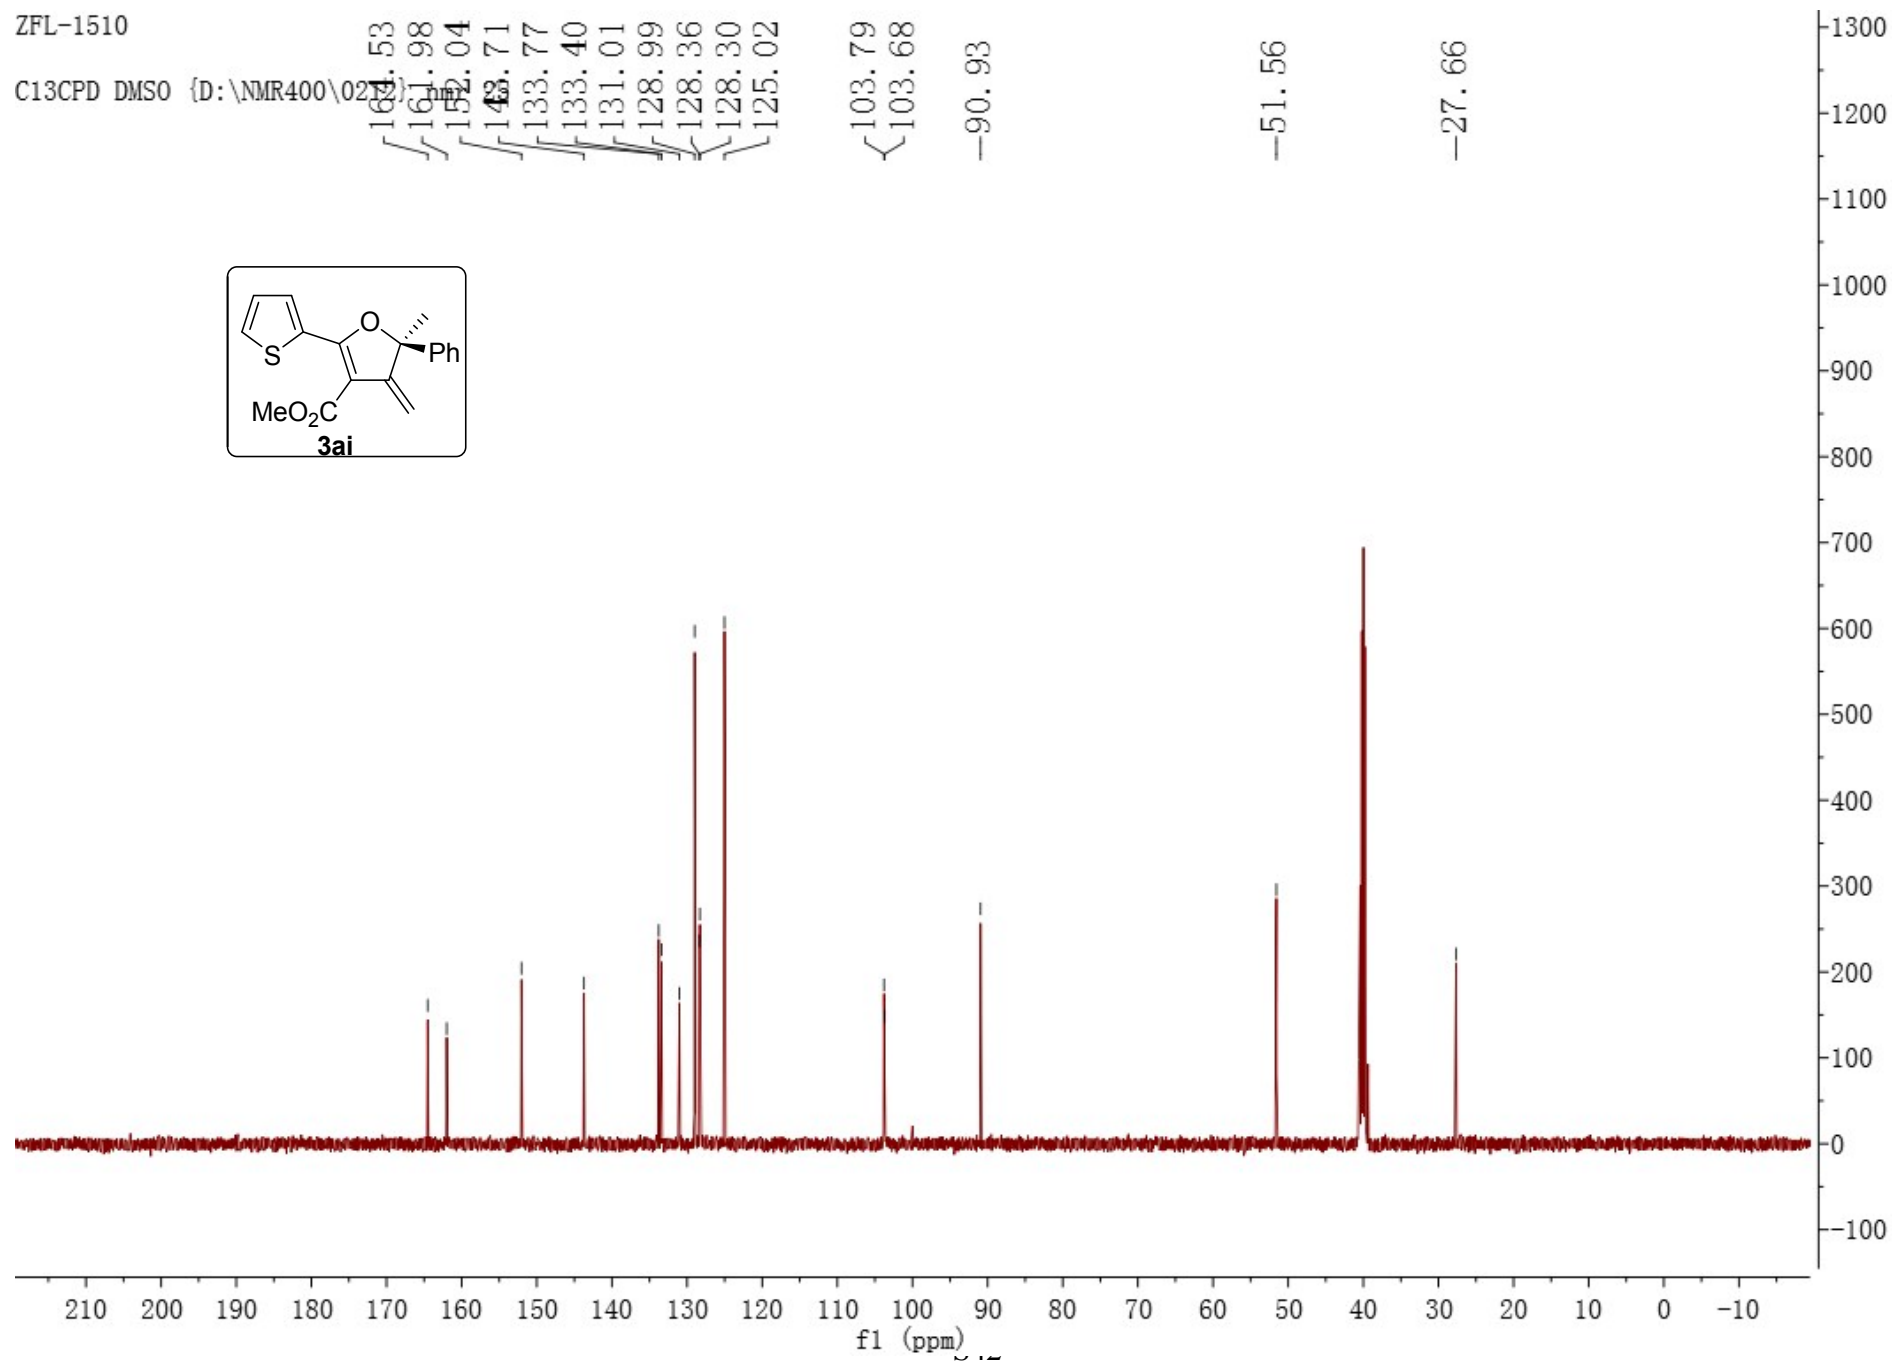

ZFL-1520

PROTON DMSO {D:\NMR400\02T2}

nmr  
7.41  
7.40  
7.38  
7.36  
7.33  
7.33  
7.32

-5.39

-4.63

-3.71

-2.40

-1.76

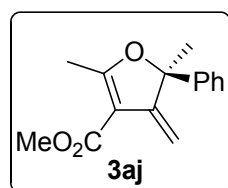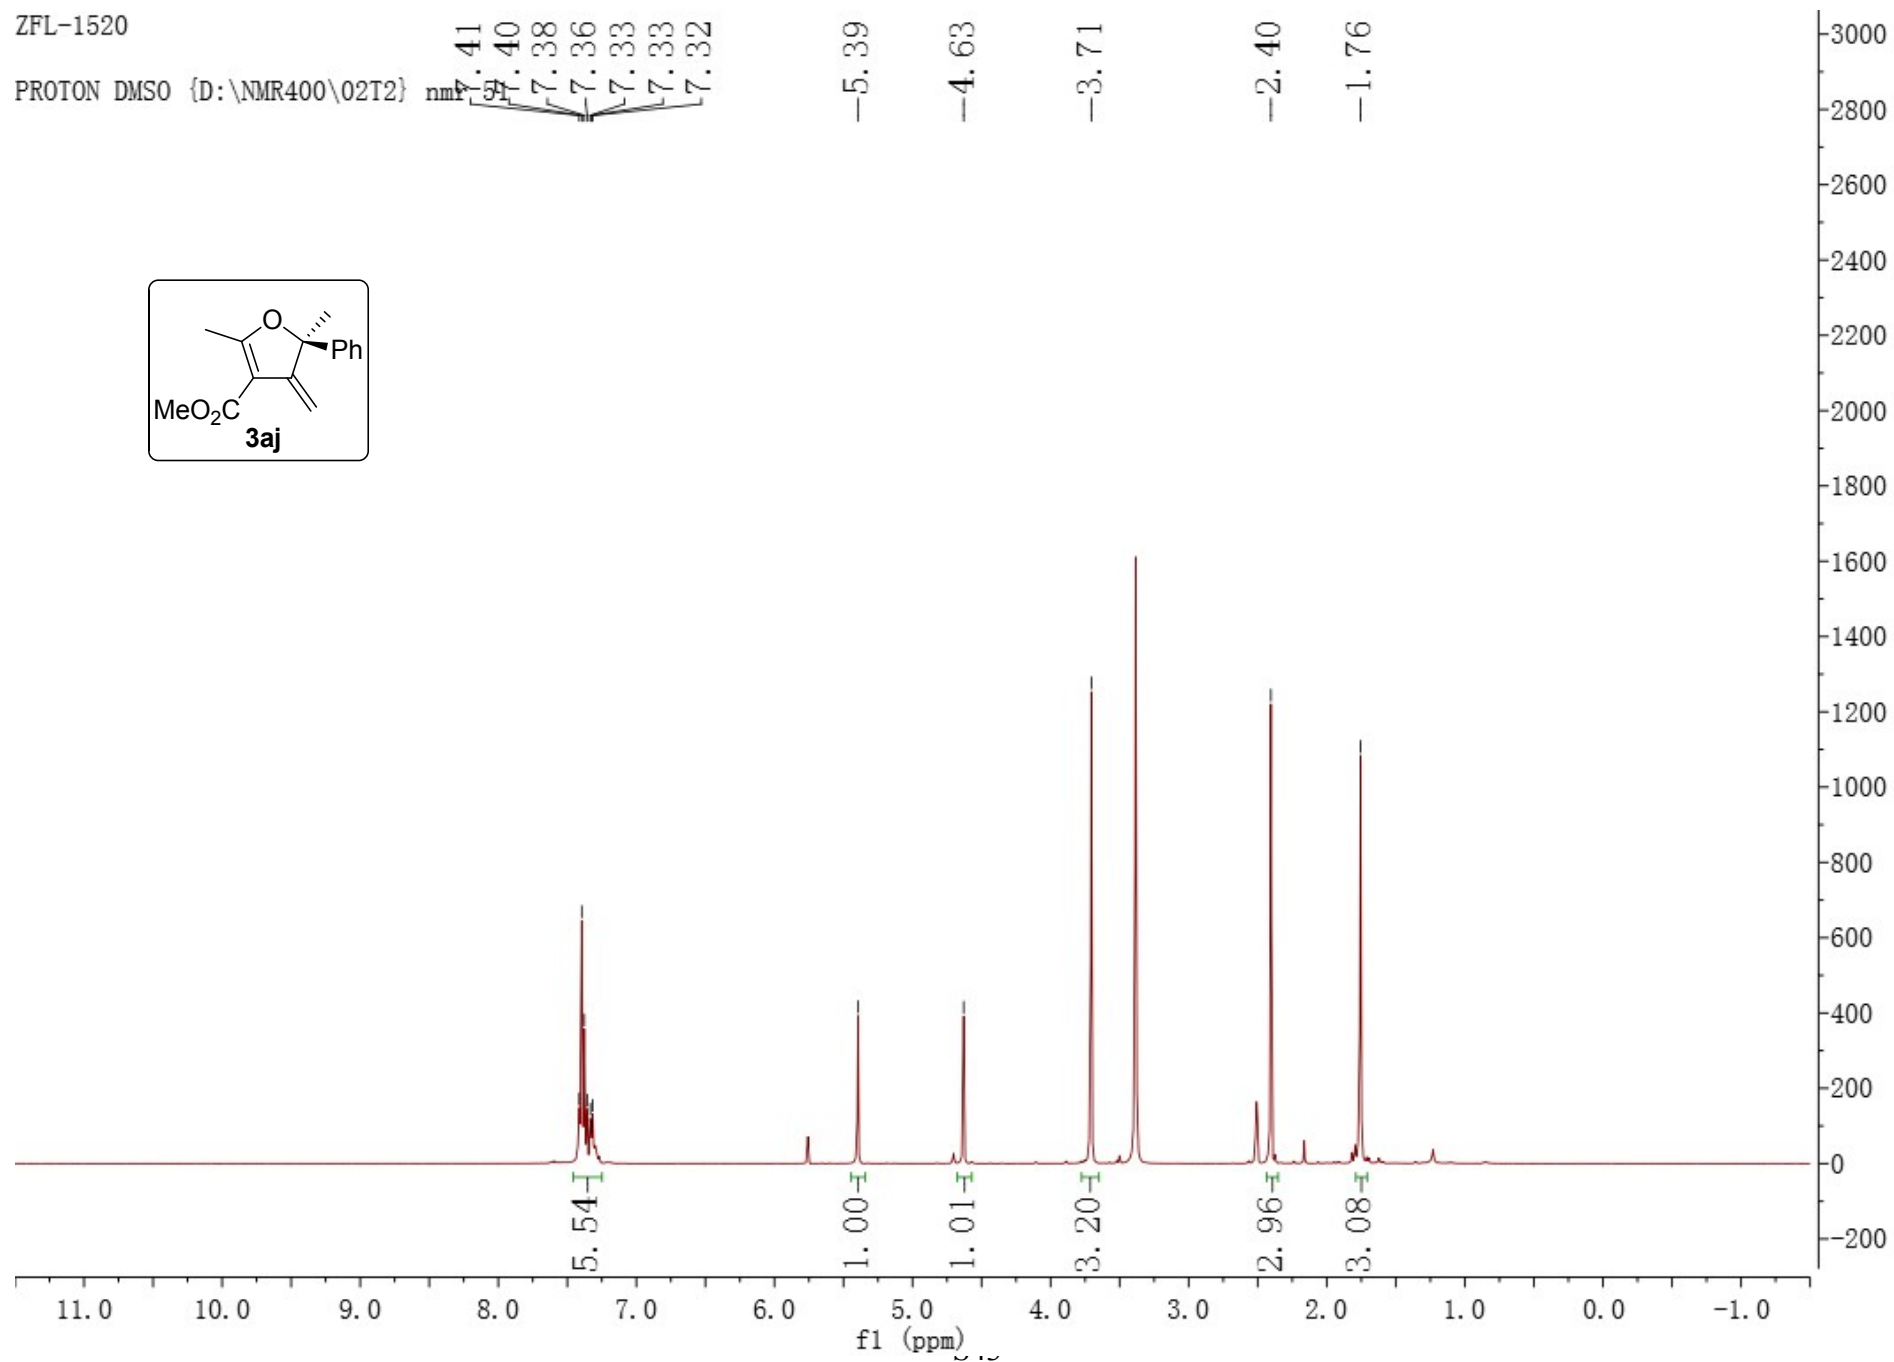



ZFL-1520

C13CPD DMSO {D:\NMR400\6212}

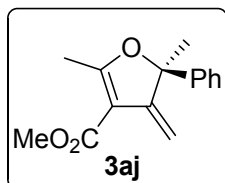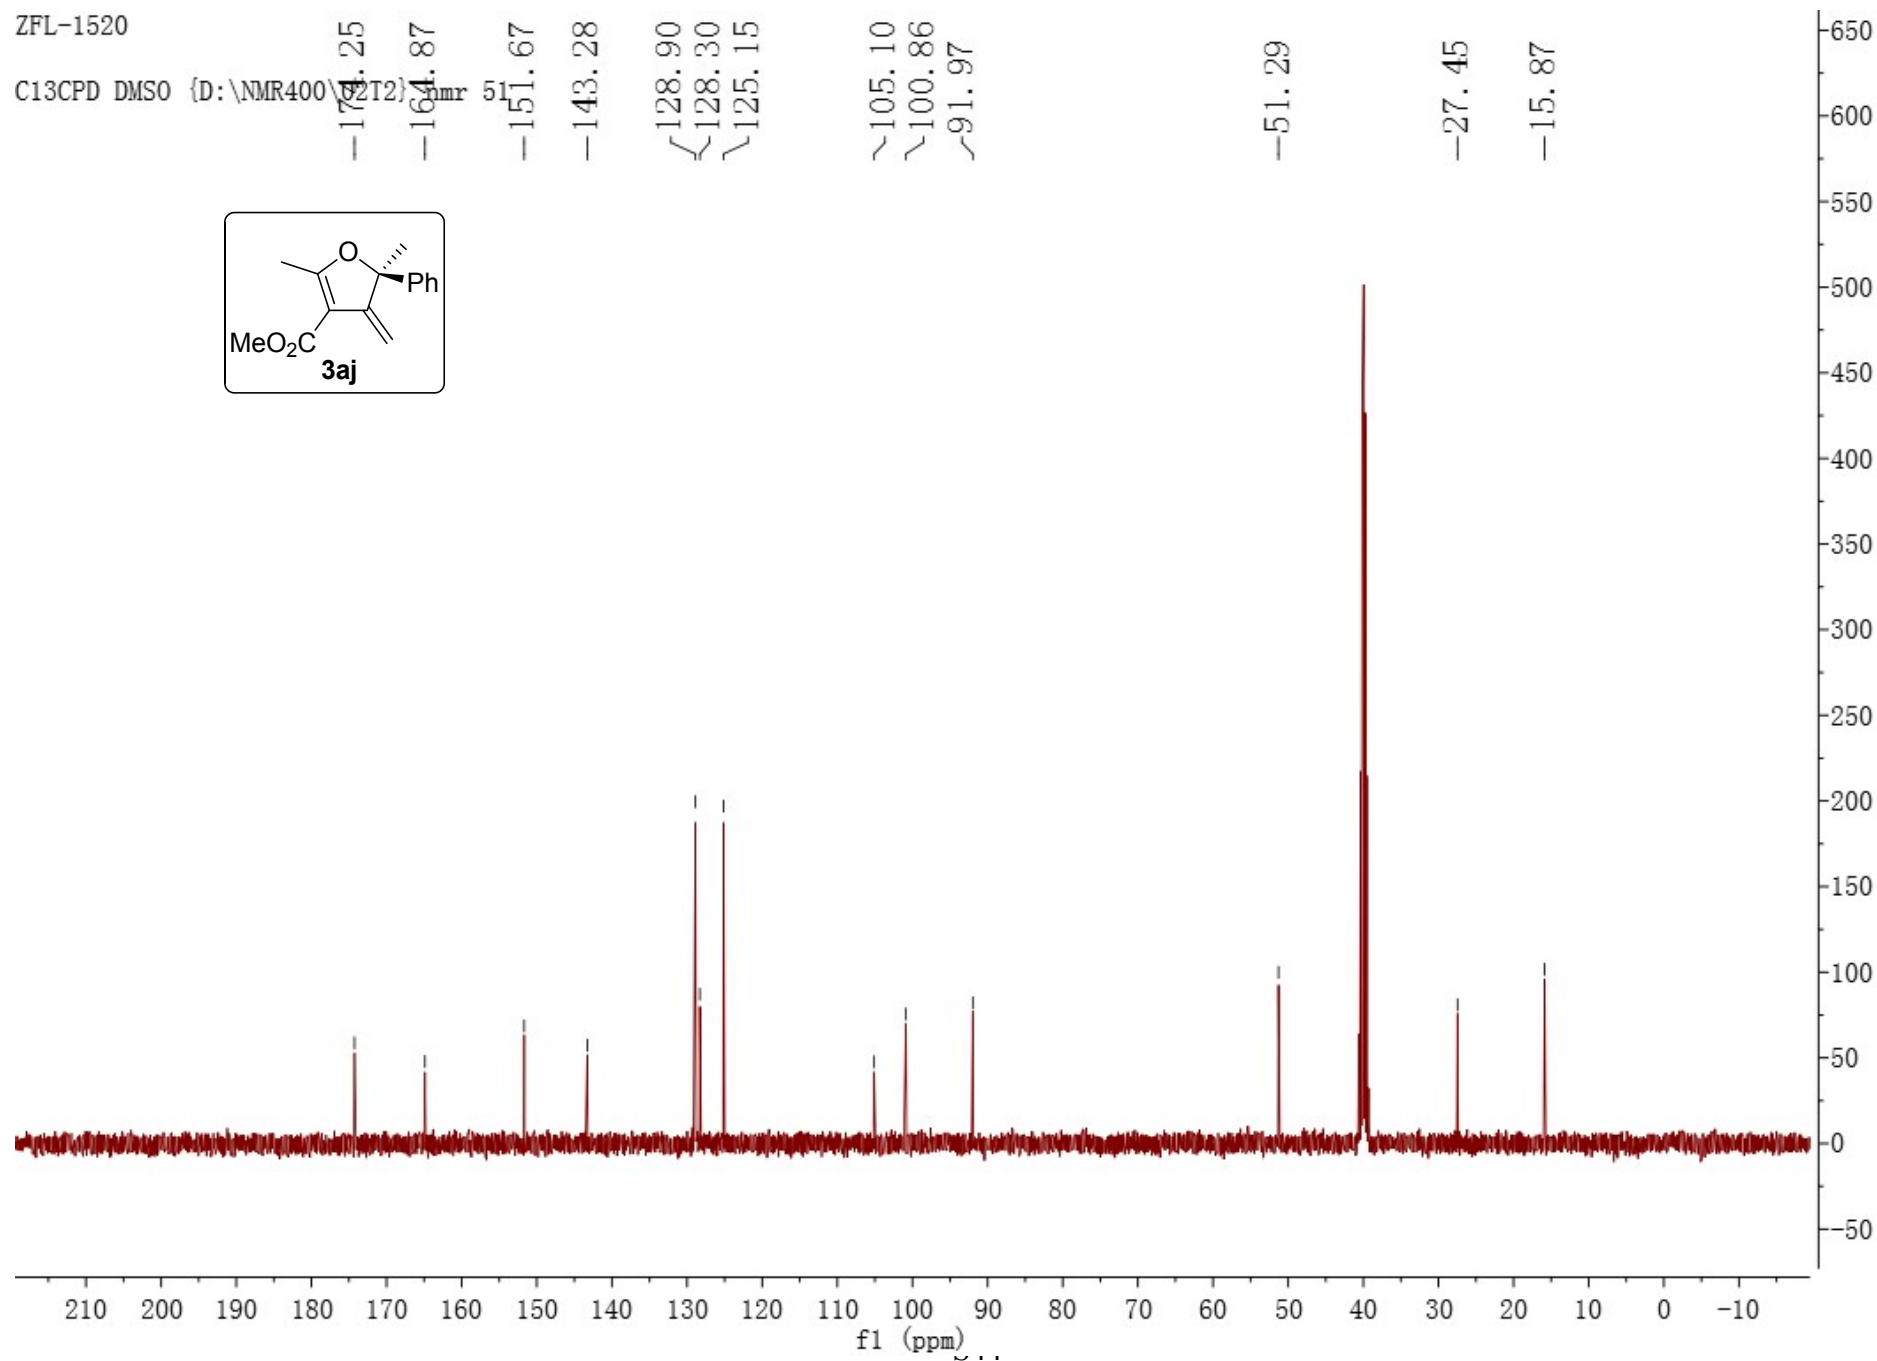

ZFL-1790

PROTON DMSO {D:\NMR400\02T2

7.41  
7.40  
7.38  
7.37  
7.34  
7.33  
7.32  
7.31  
7.31  
7.30

-5.38

-4.62

3.76

3.74

3.72

3.70

1.73

1.21

1.20

1.18

1.16

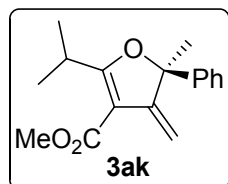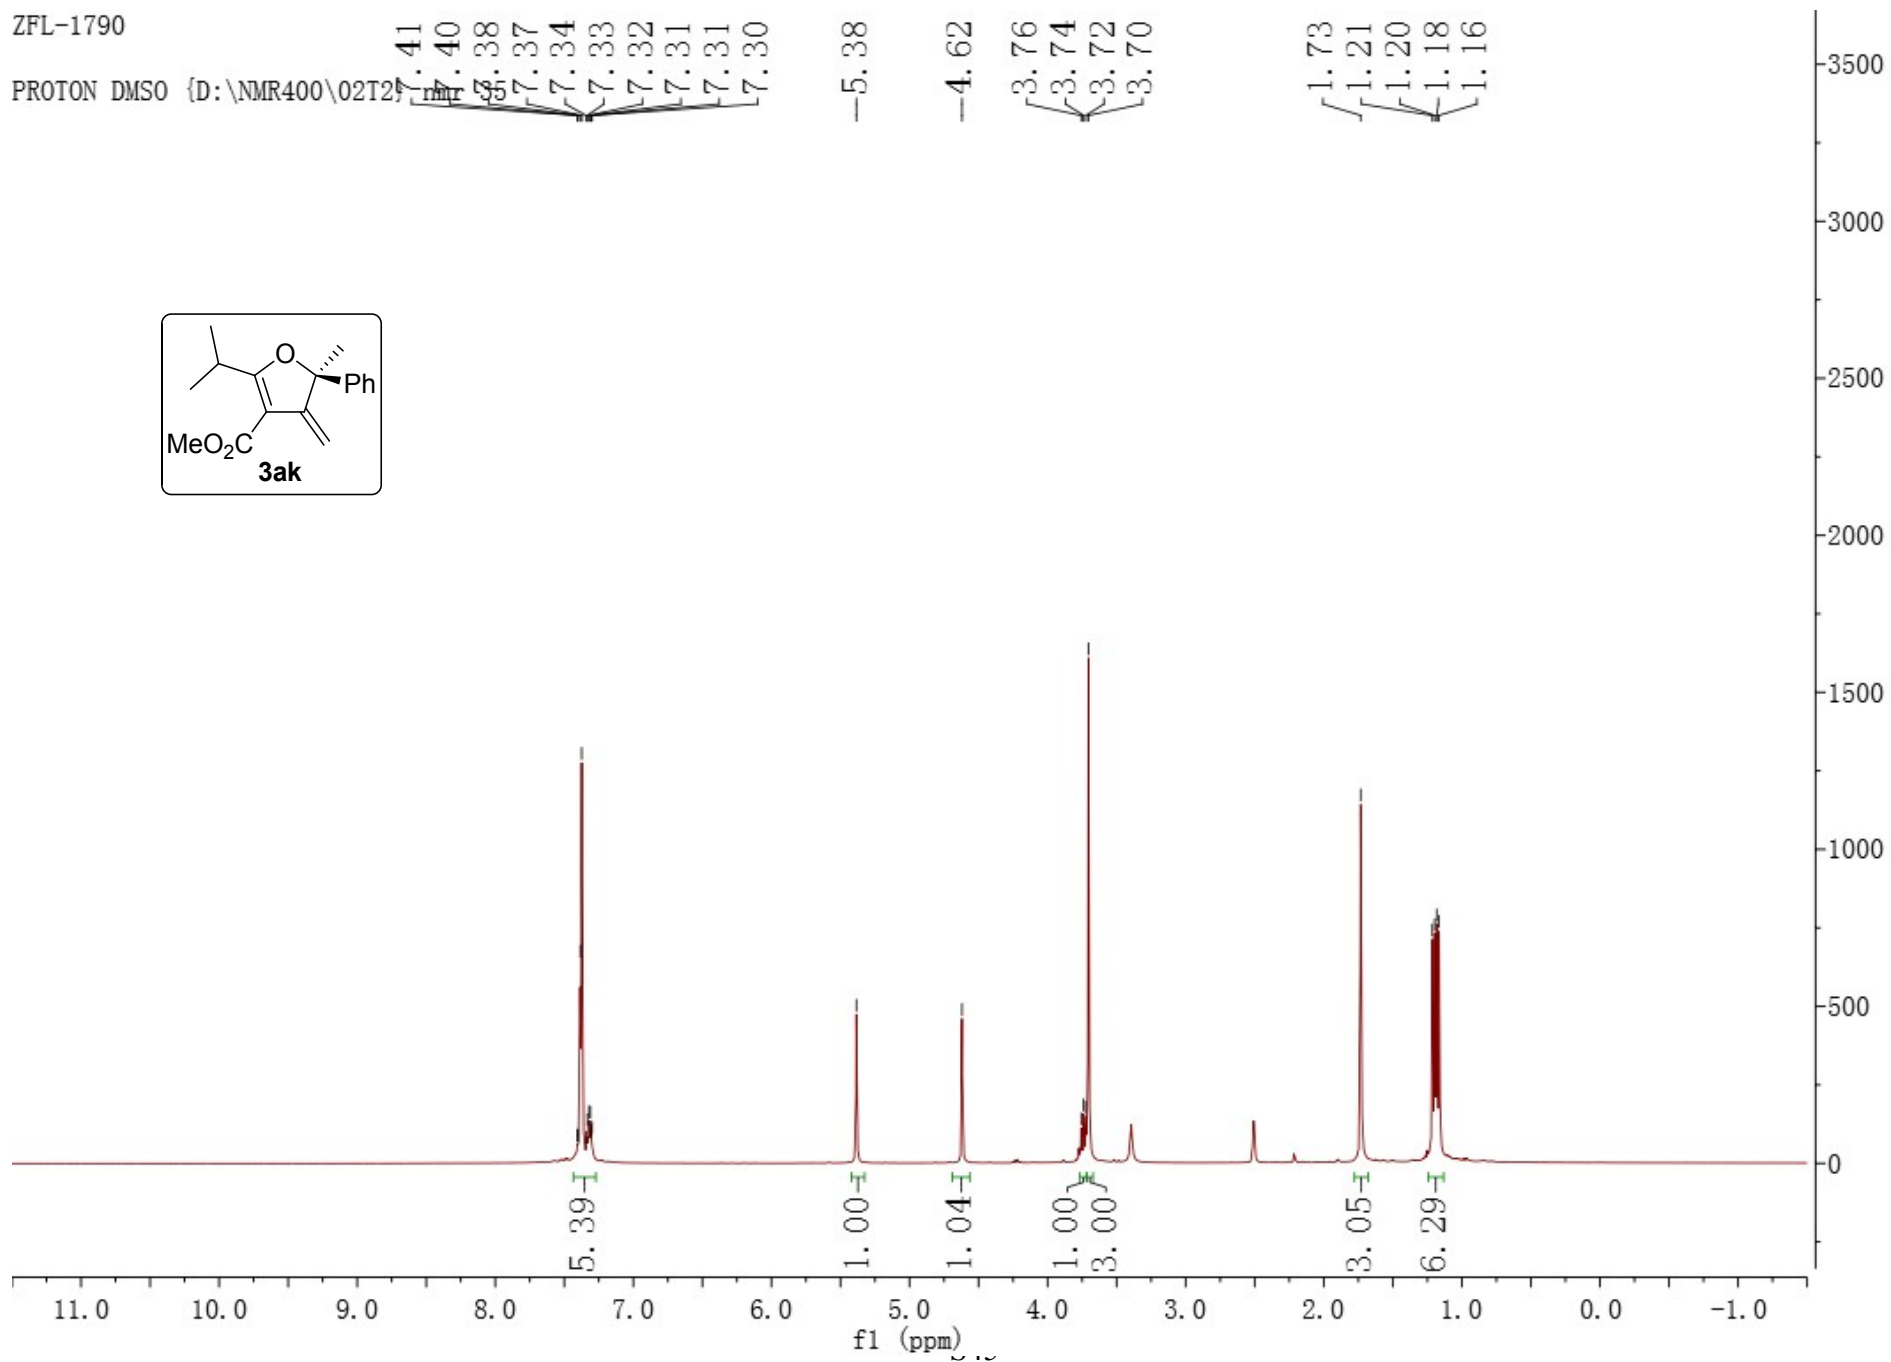

ZFL-1790

C13CPD DMSO {D:\NMR4\02T2}

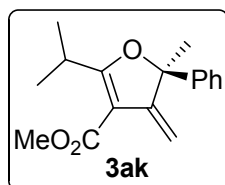

180.96  
164.78  
152.03  
143.49  
128.90  
128.23  
124.91  
103.28  
101.23  
91.40  
51.31  
27.80  
27.46  
19.86  
19.82

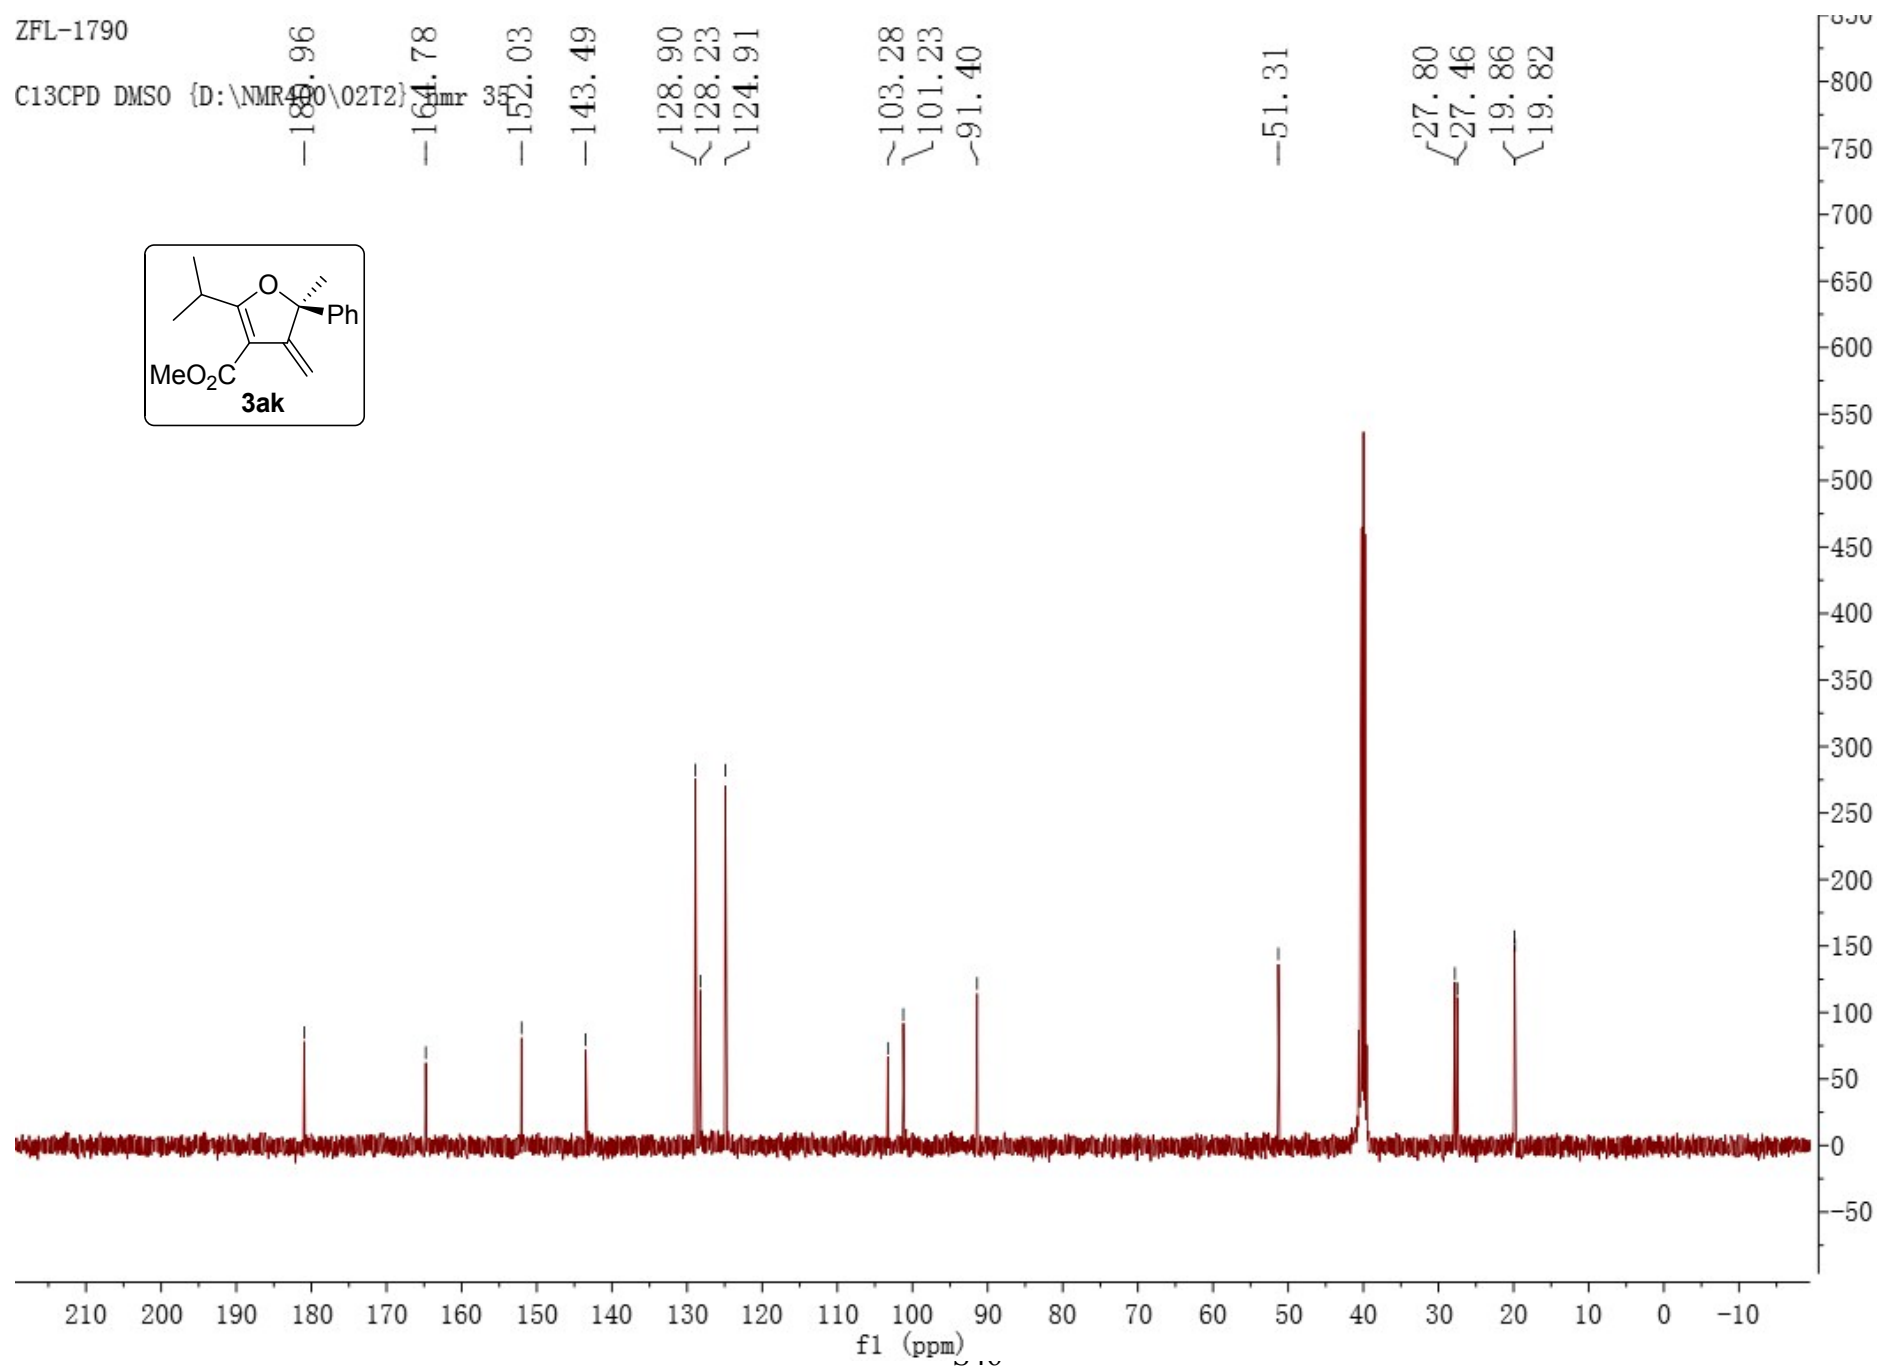

ZFL-1575

PROTON DMSO

7.22, 7.20, 7.19, 7.18, 7.17, 7.16, 7.15, 7.14, 7.13, 7.12, 7.11, 7.10, 7.09, 7.08, 7.07, 7.06, 7.05, 7.04, 7.03, 7.02, 7.01, 7.00, 6.99, 6.98, 6.97, 6.96, 6.95, 6.94, 6.93, 6.92, 6.91, 6.90, 6.89, 6.88, 6.87, 6.86, 6.85, 6.84, 6.83, 6.82, 6.81, 6.80, 6.79, 6.78, 6.77, 6.76, 6.75, 6.74, 6.73, 6.72, 6.71, 6.70, 6.69, 6.68, 6.67, 6.66, 6.65, 6.64, 6.63, 6.62, 6.61, 6.60, 6.59, 6.58, 6.57, 6.56, 6.55, 6.54, 6.53, 6.52, 6.51, 6.50, 6.49, 6.47, 6.45, 6.45, 6.38, 6.36, 6.21, 6.19, 5.51

4.78

3.62

2.29

1.83

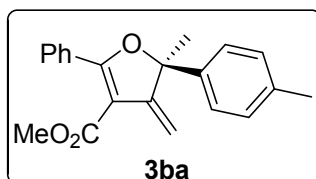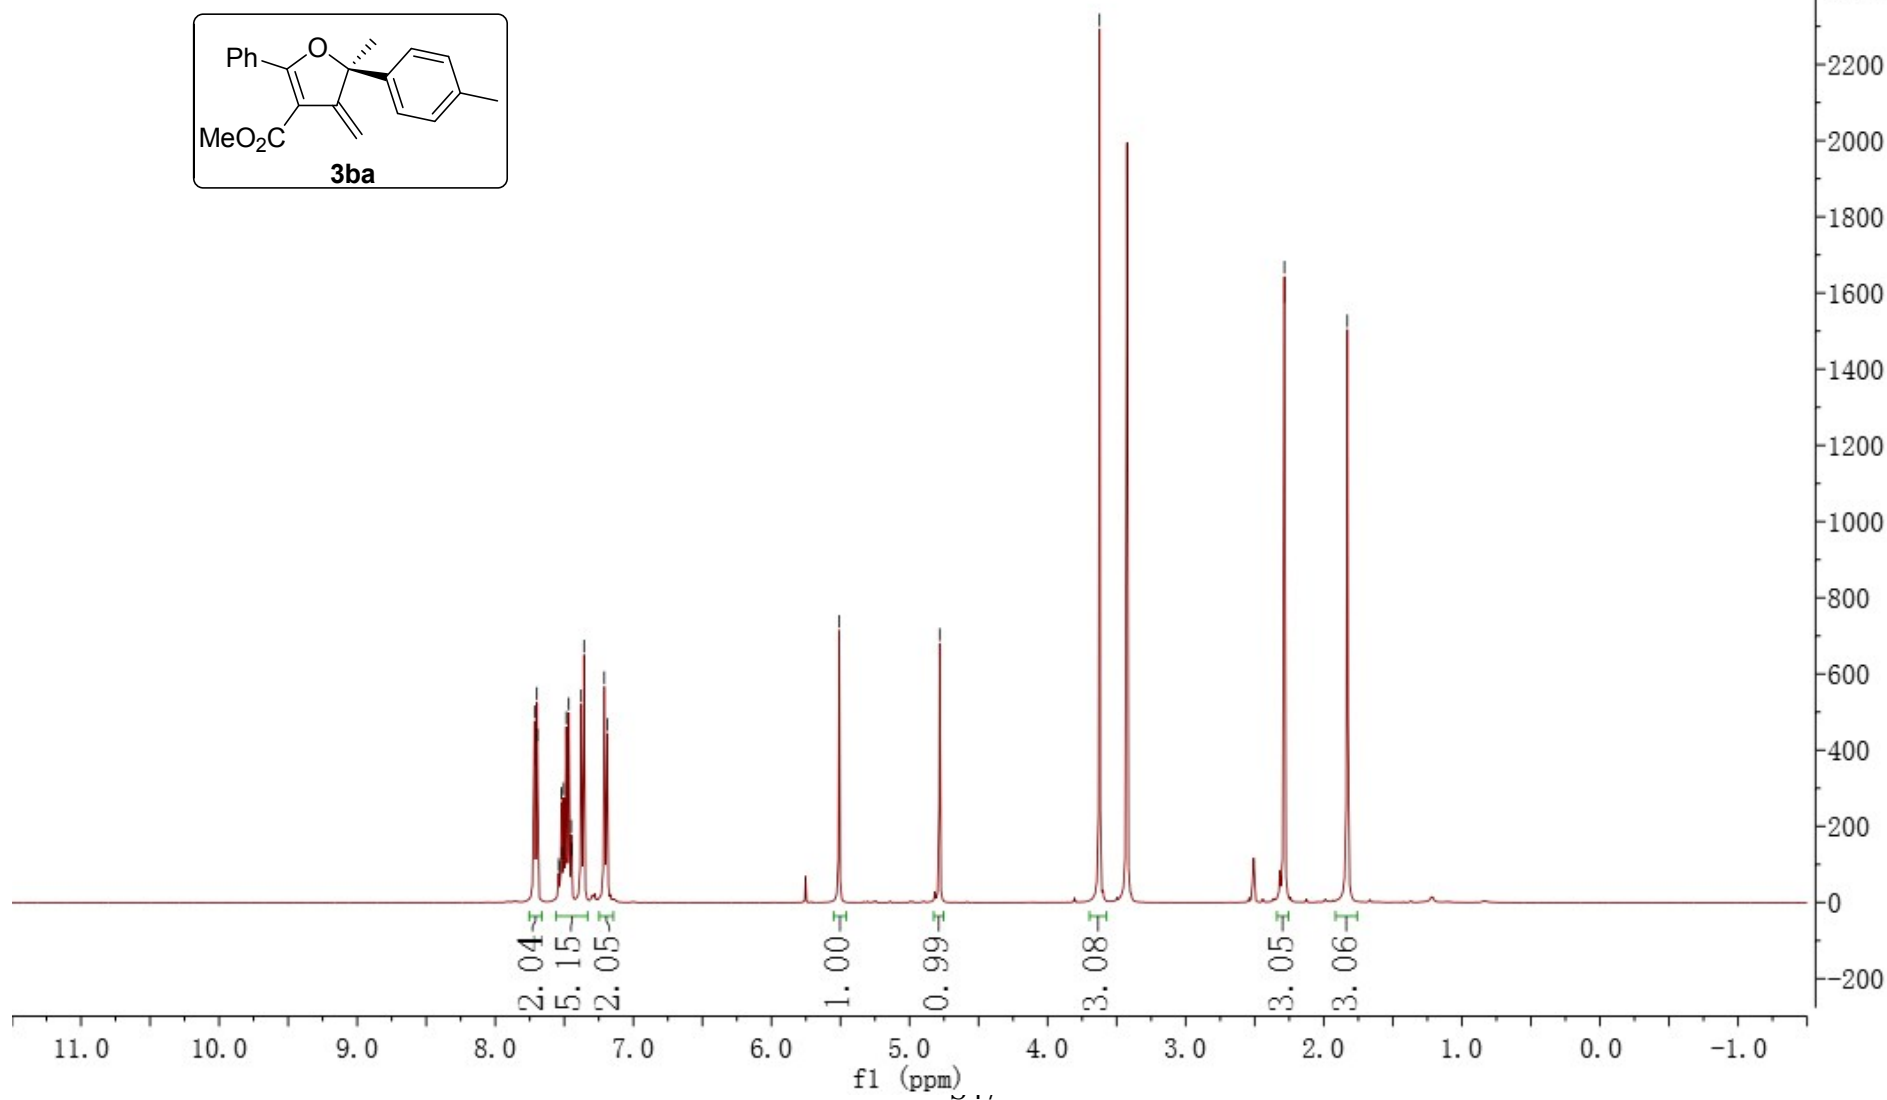

ZFL-1575

C13CPD DMSO {D:\NMR400\0219\}

169.56  
164.50

152.77

140.60

137.68

131.41

129.51

129.37

128.44

125.15

105.56

102.82

91.39

51.40

27.64

21.05

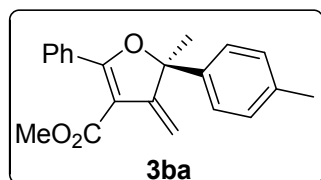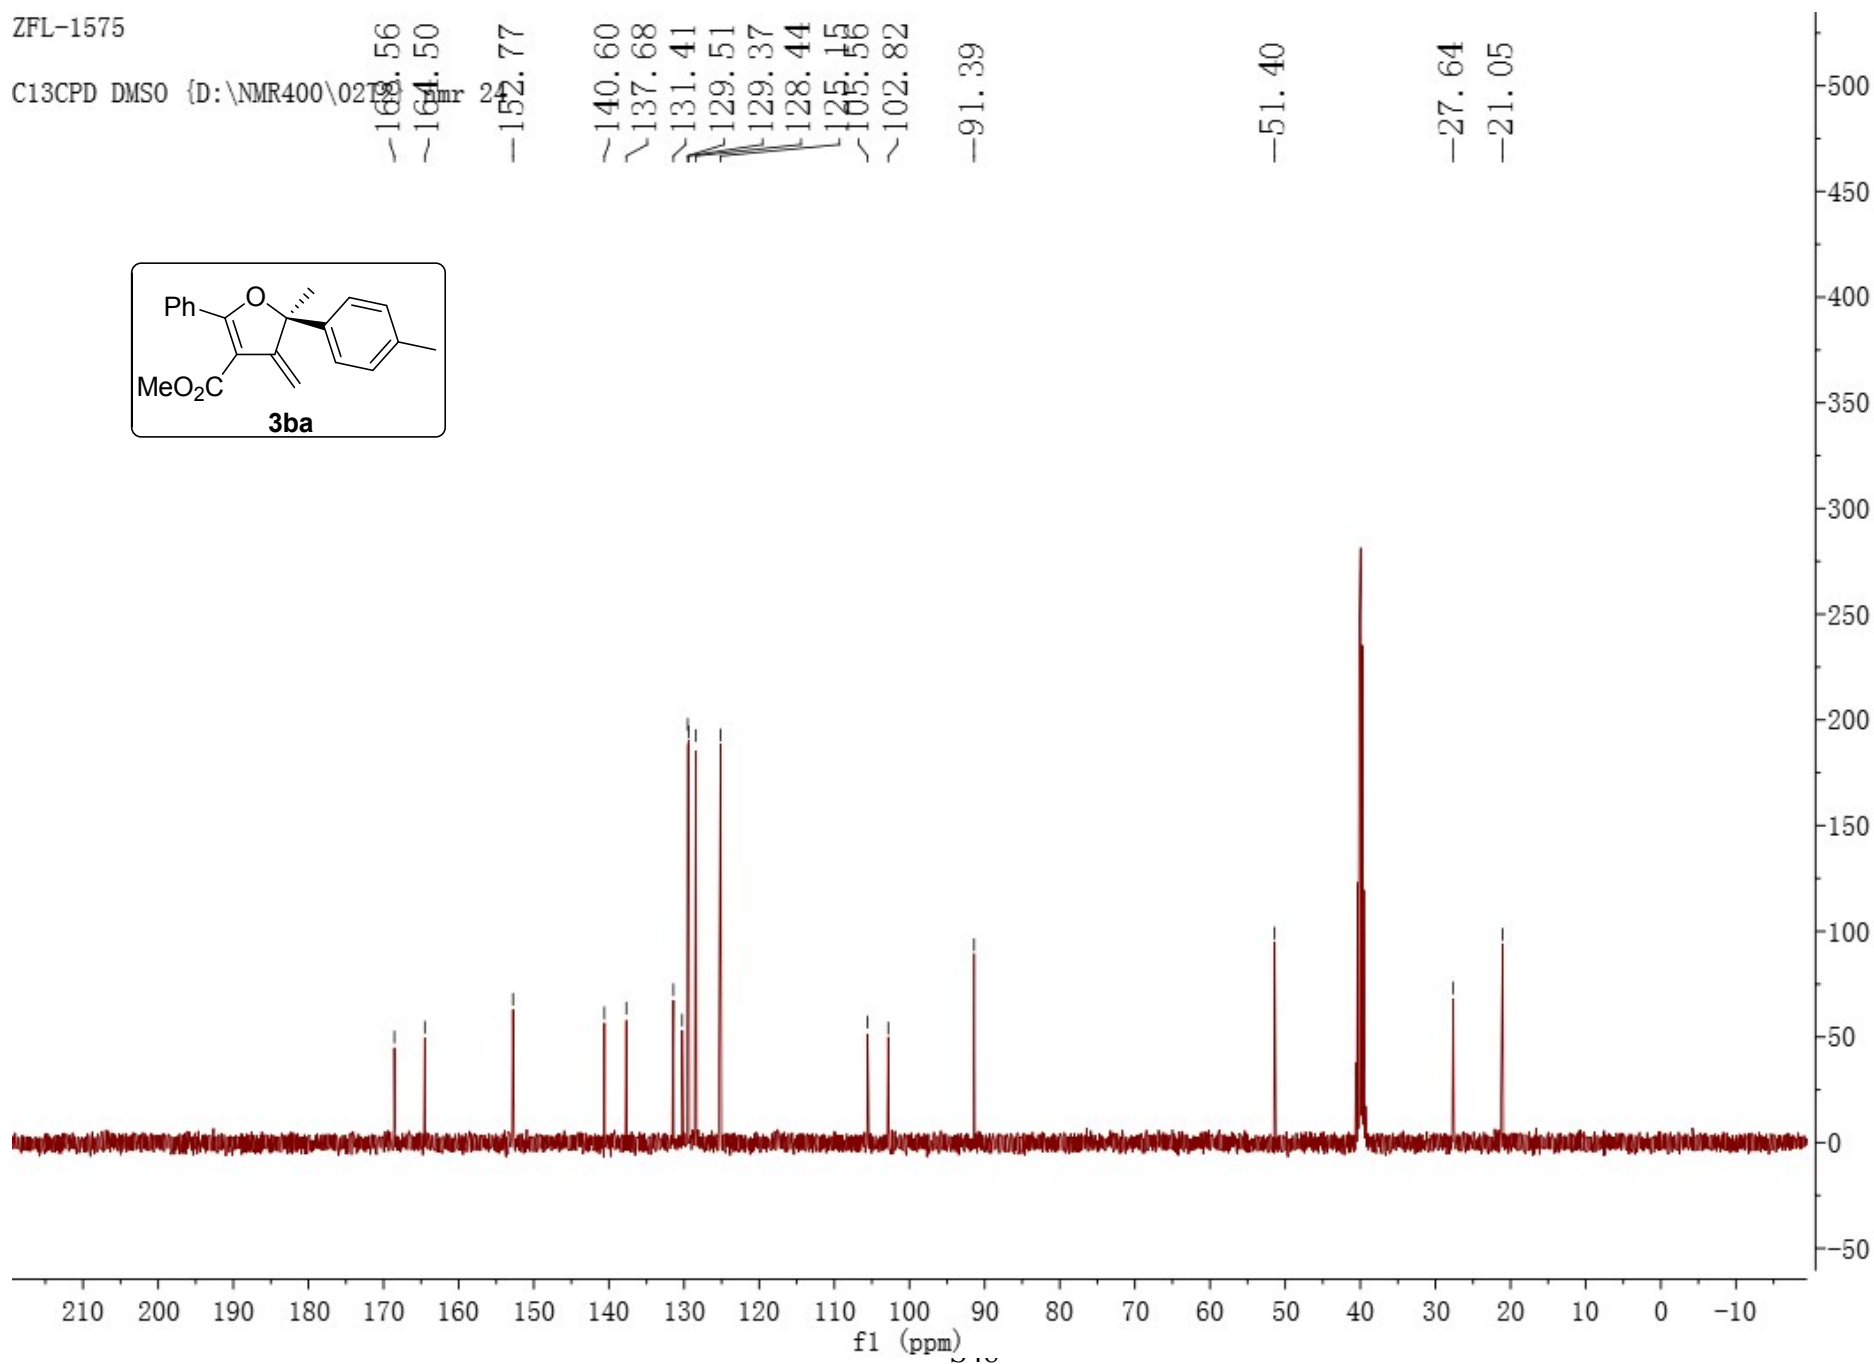

zfl-1564

PROTON DMSO

7.72  
7.71  
7.70  
7.55  
7.55  
7.54  
7.53  
7.52  
7.52  
7.51  
7.49  
7.47  
7.46  
7.25  
7.23  
7.20  
-5.53

-4.83

-3.63

-1.85

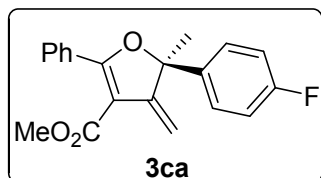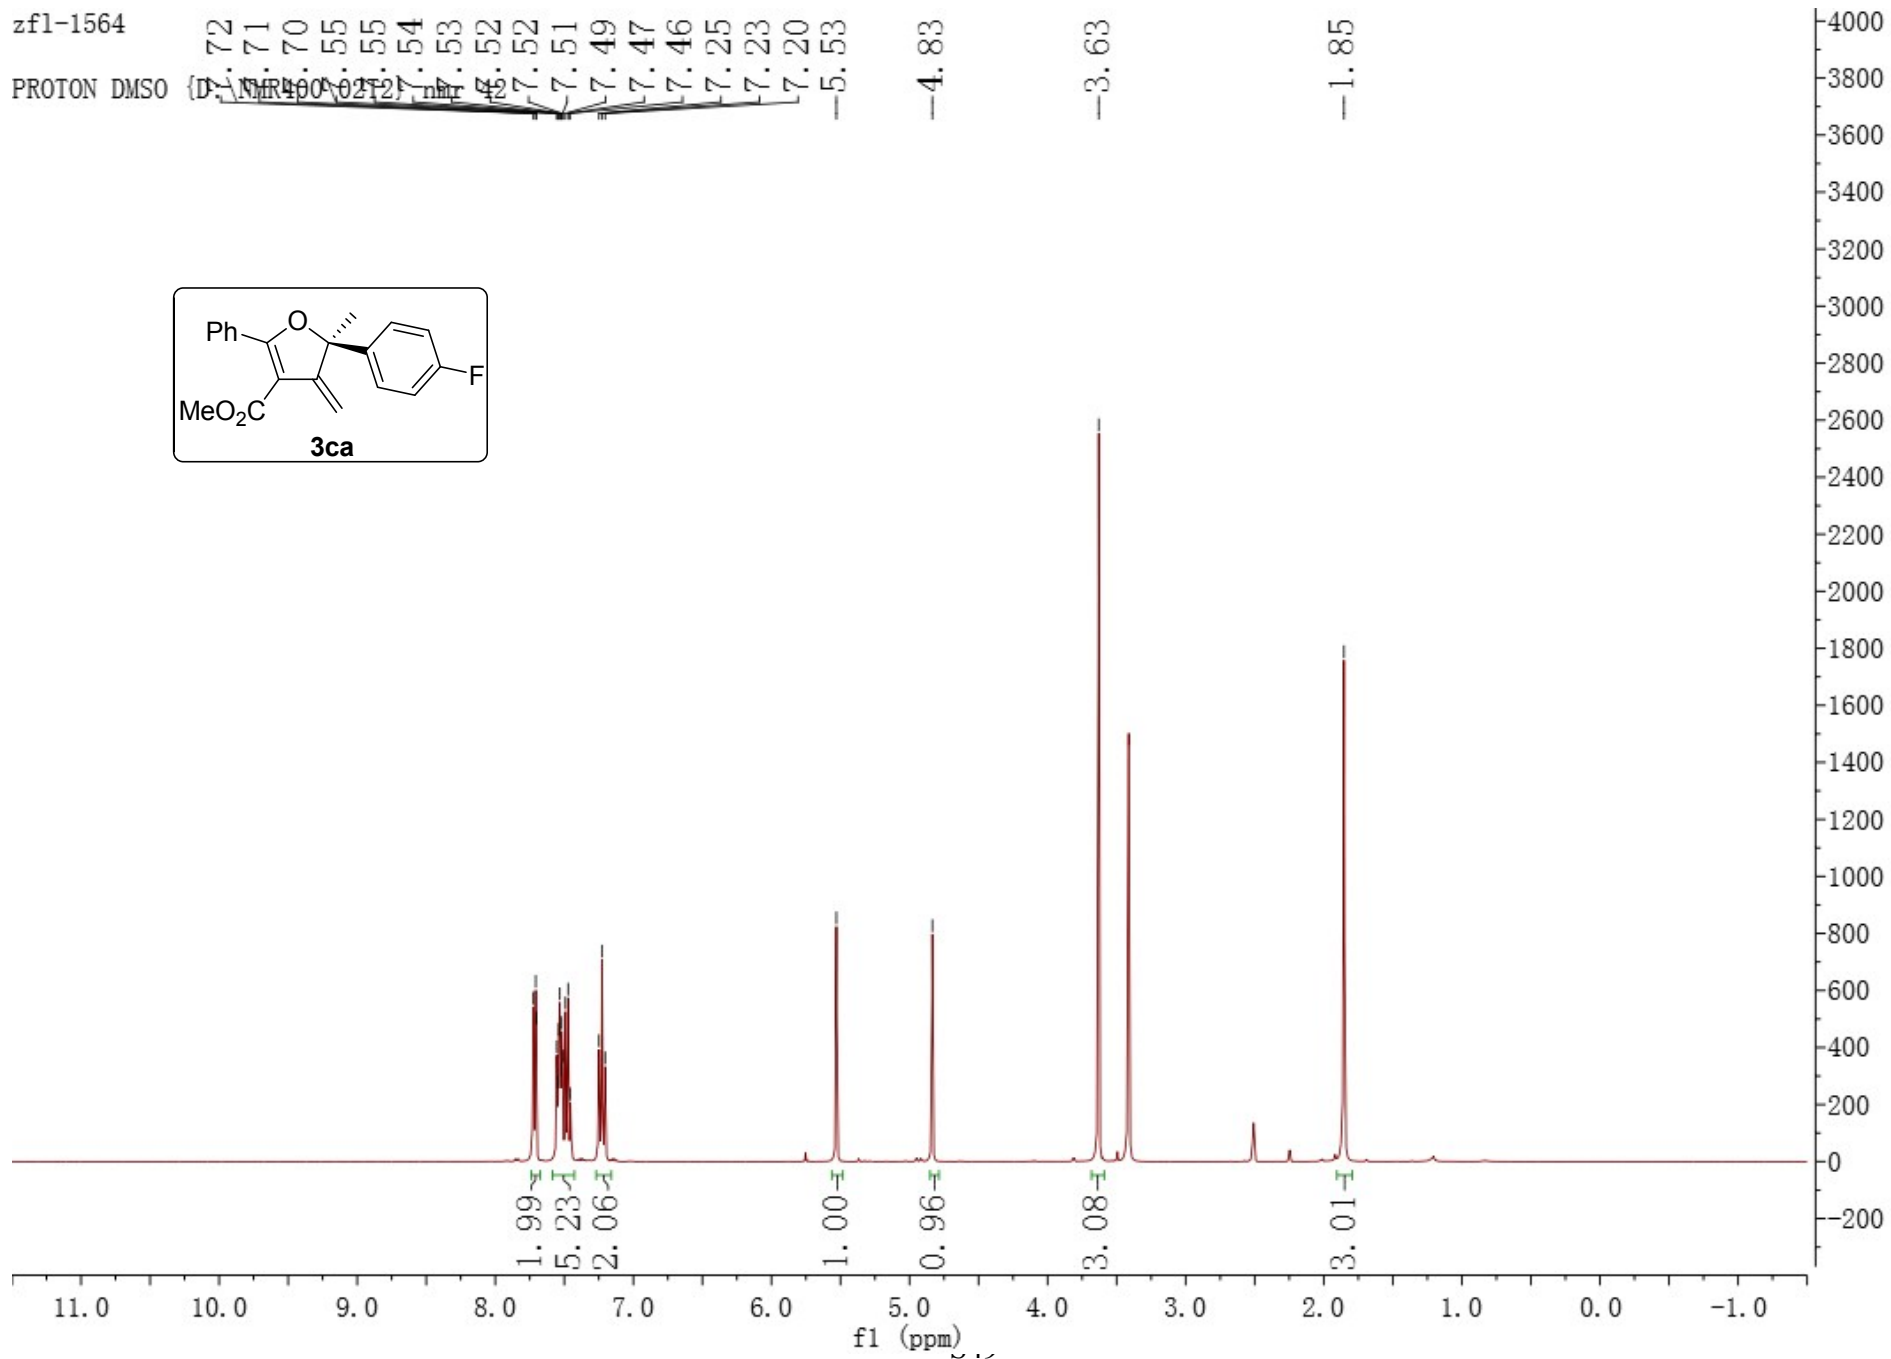

zfl-1564

C13CPD DMSO {D:\NMR400\029\

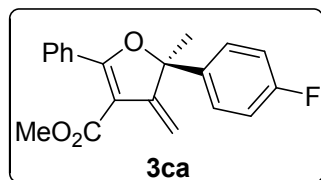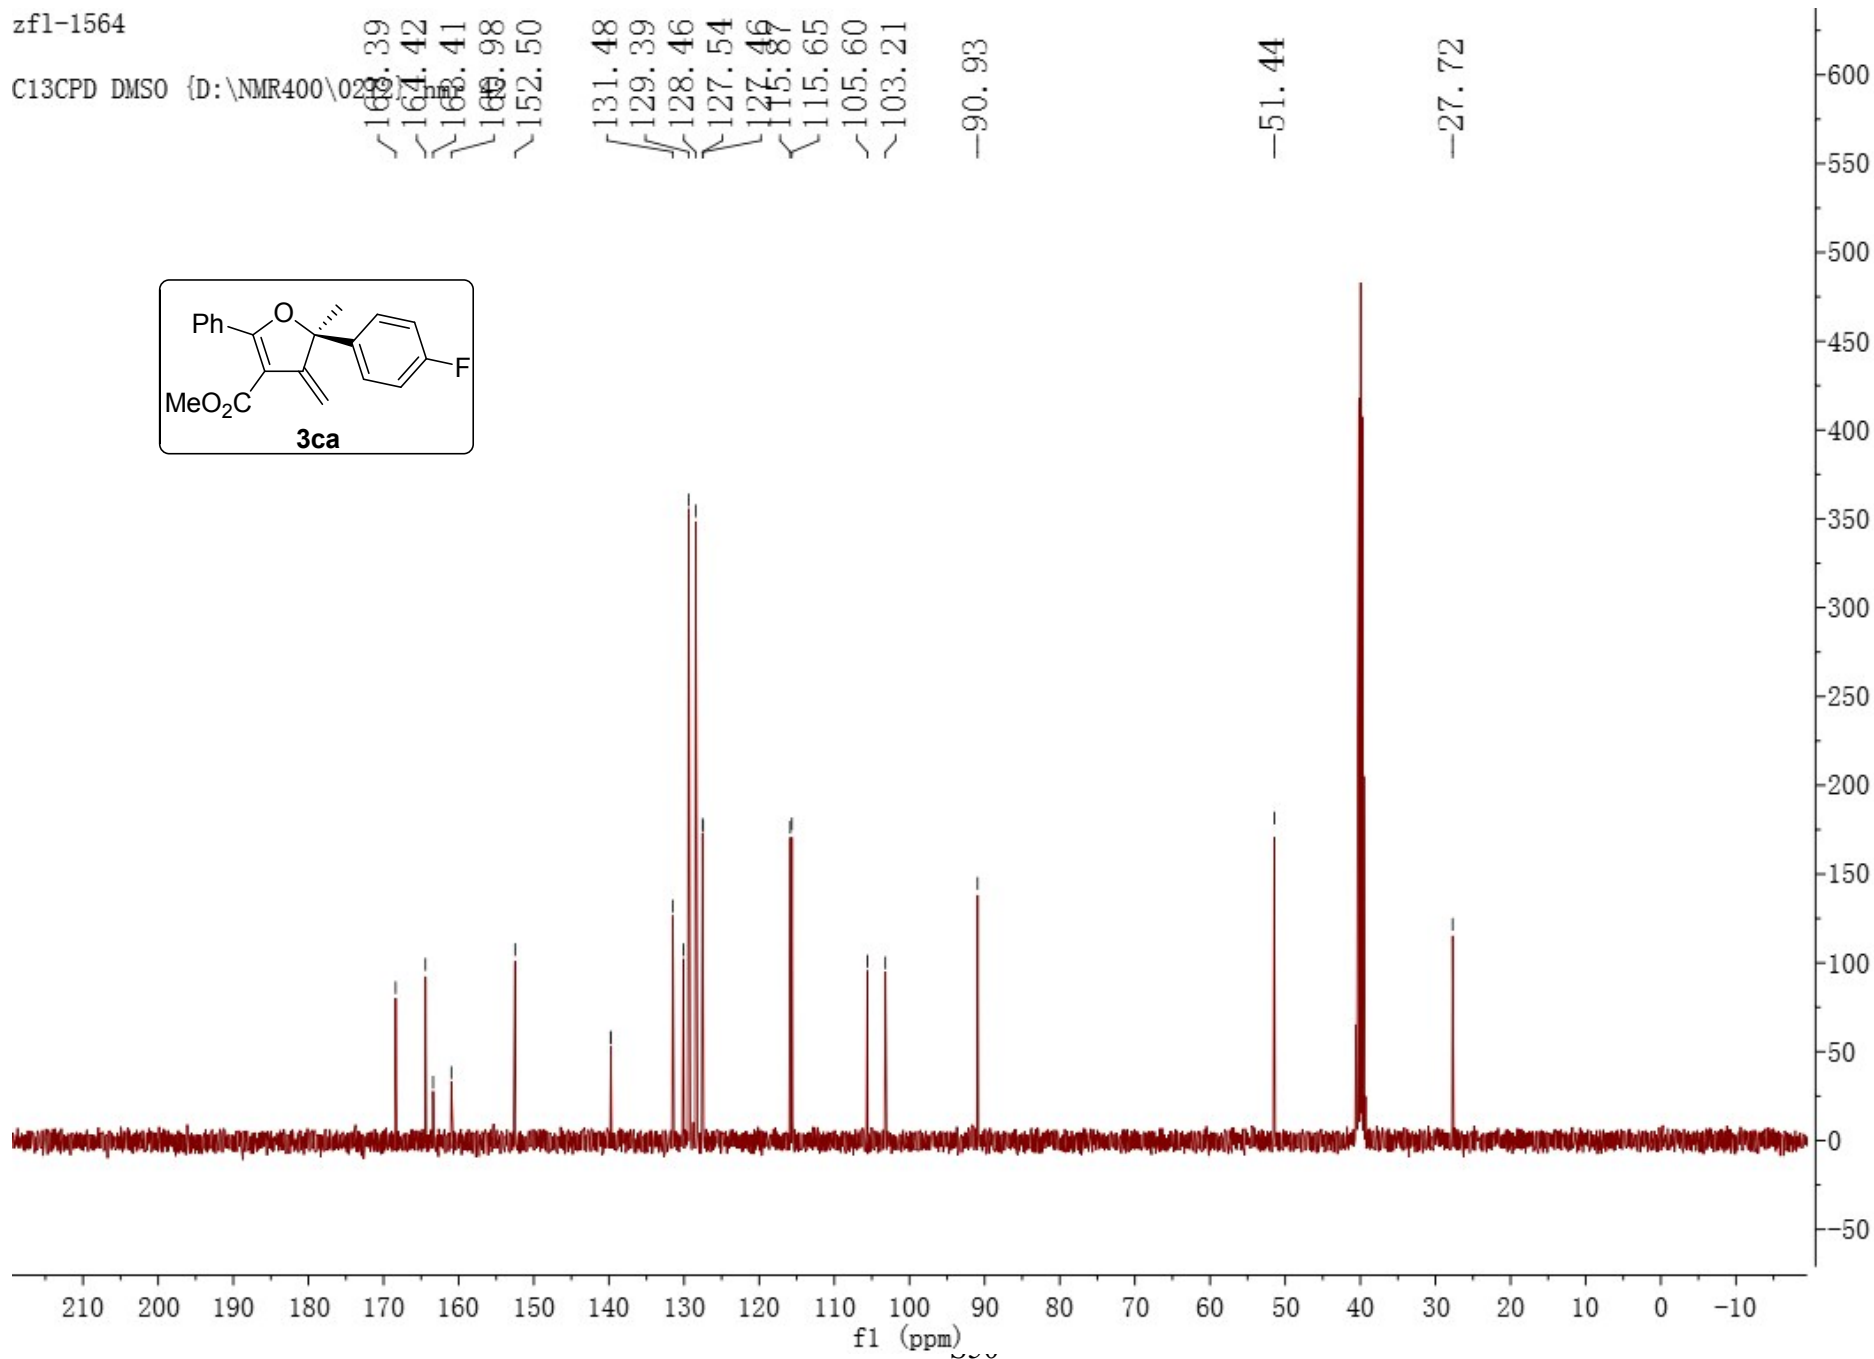



72 70 61 59 55 53 51 49 47 45 43

0212] Nmr 38 7 7 7 7 7 7

—5.52

—4.85

-3.62

-1.84

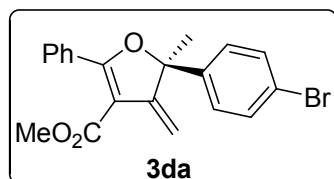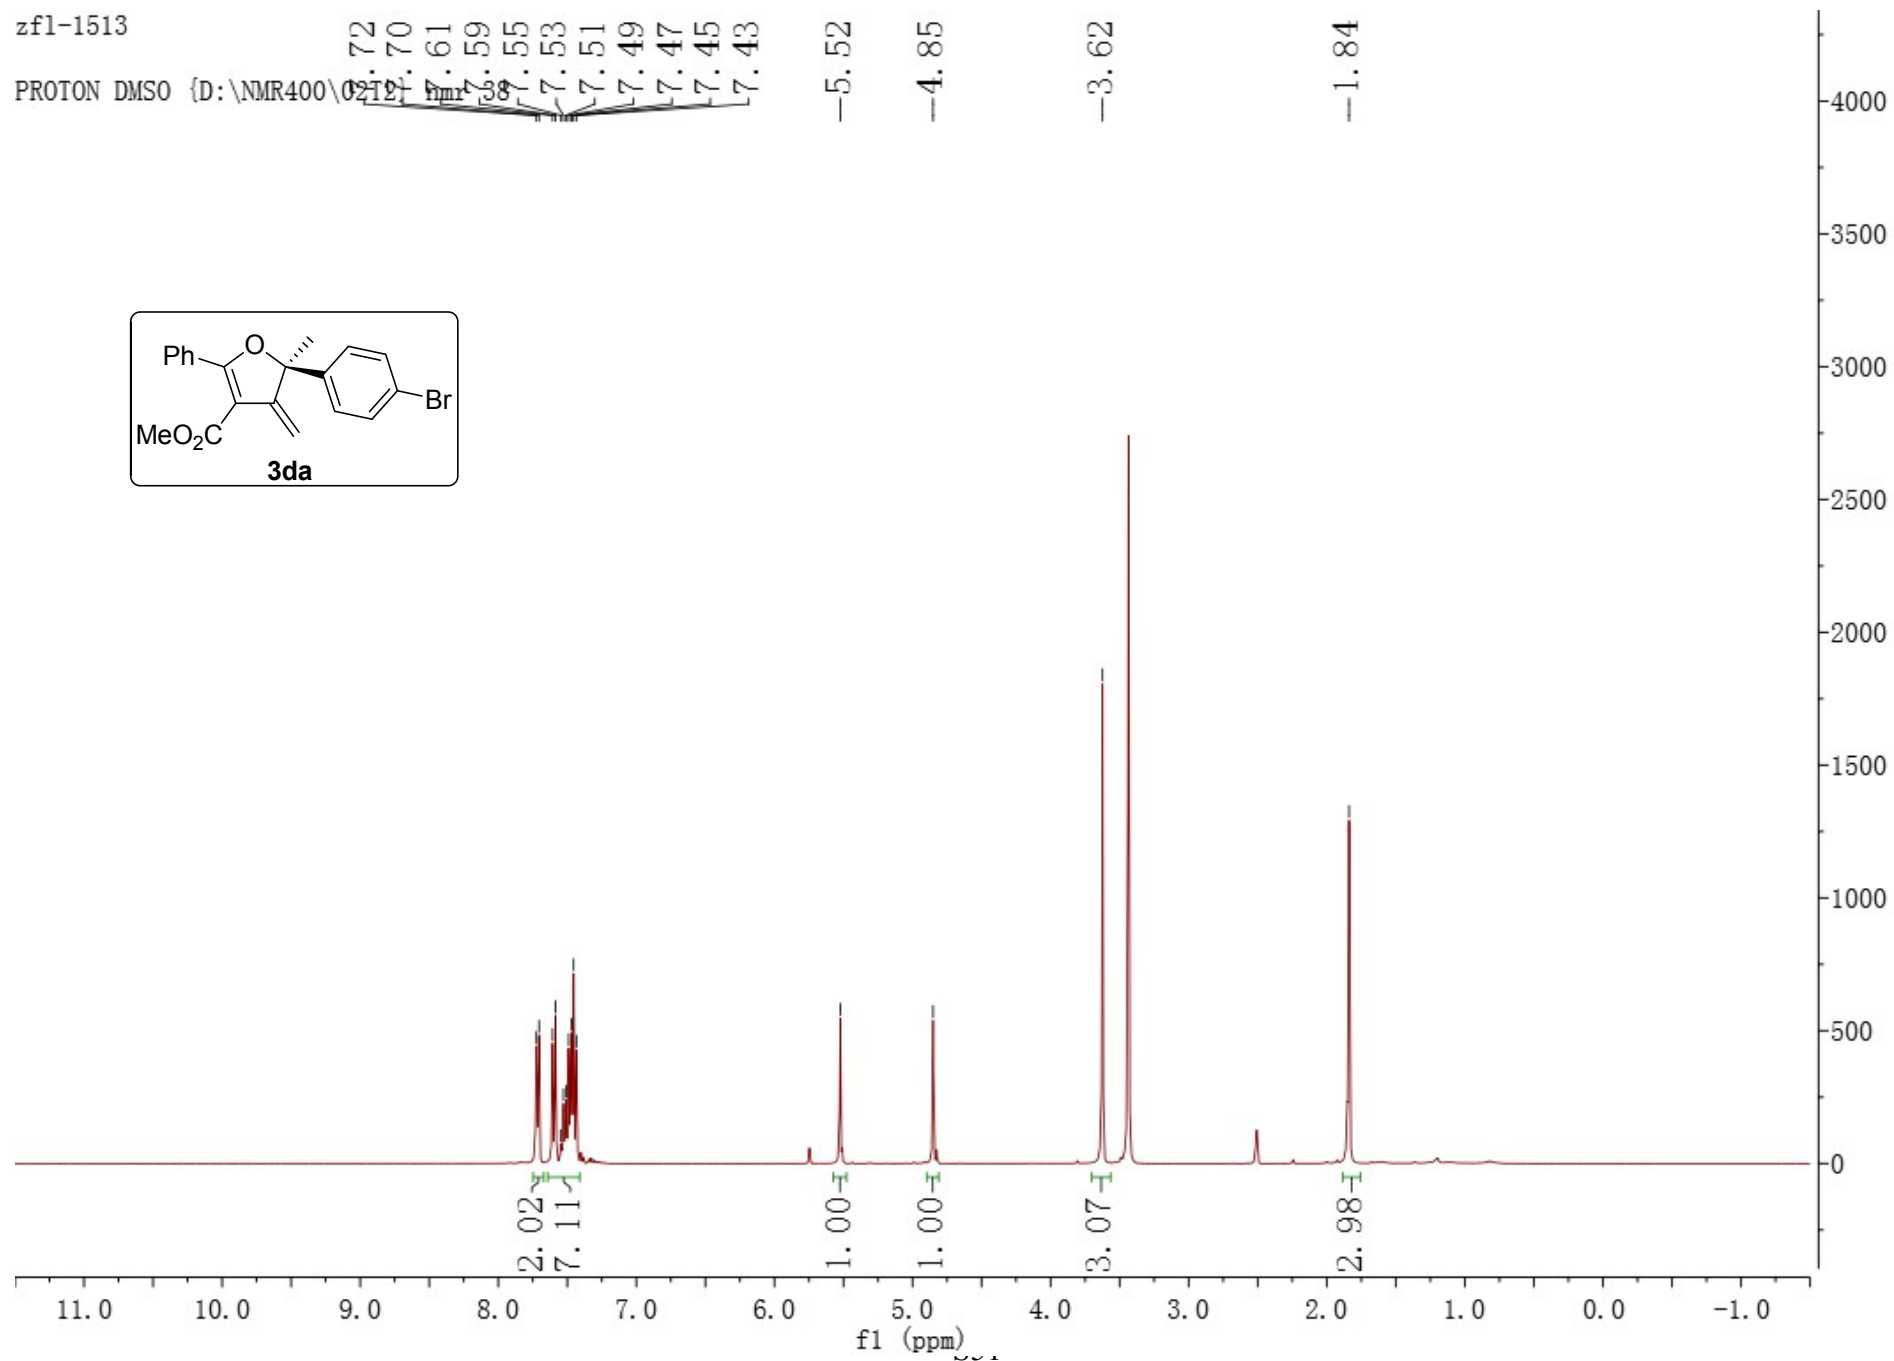

zfl-1513

C13CPD DMSO {D:\NMR400\0219

169.40  
164.37  
152.20  
142.90  
131.95  
131.53  
130.00  
129.40  
128.47  
127.48  
105.63  
103.35

-90.84

-51.49

-27.51

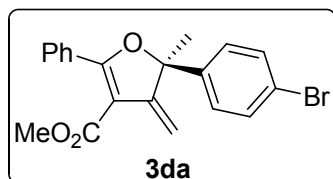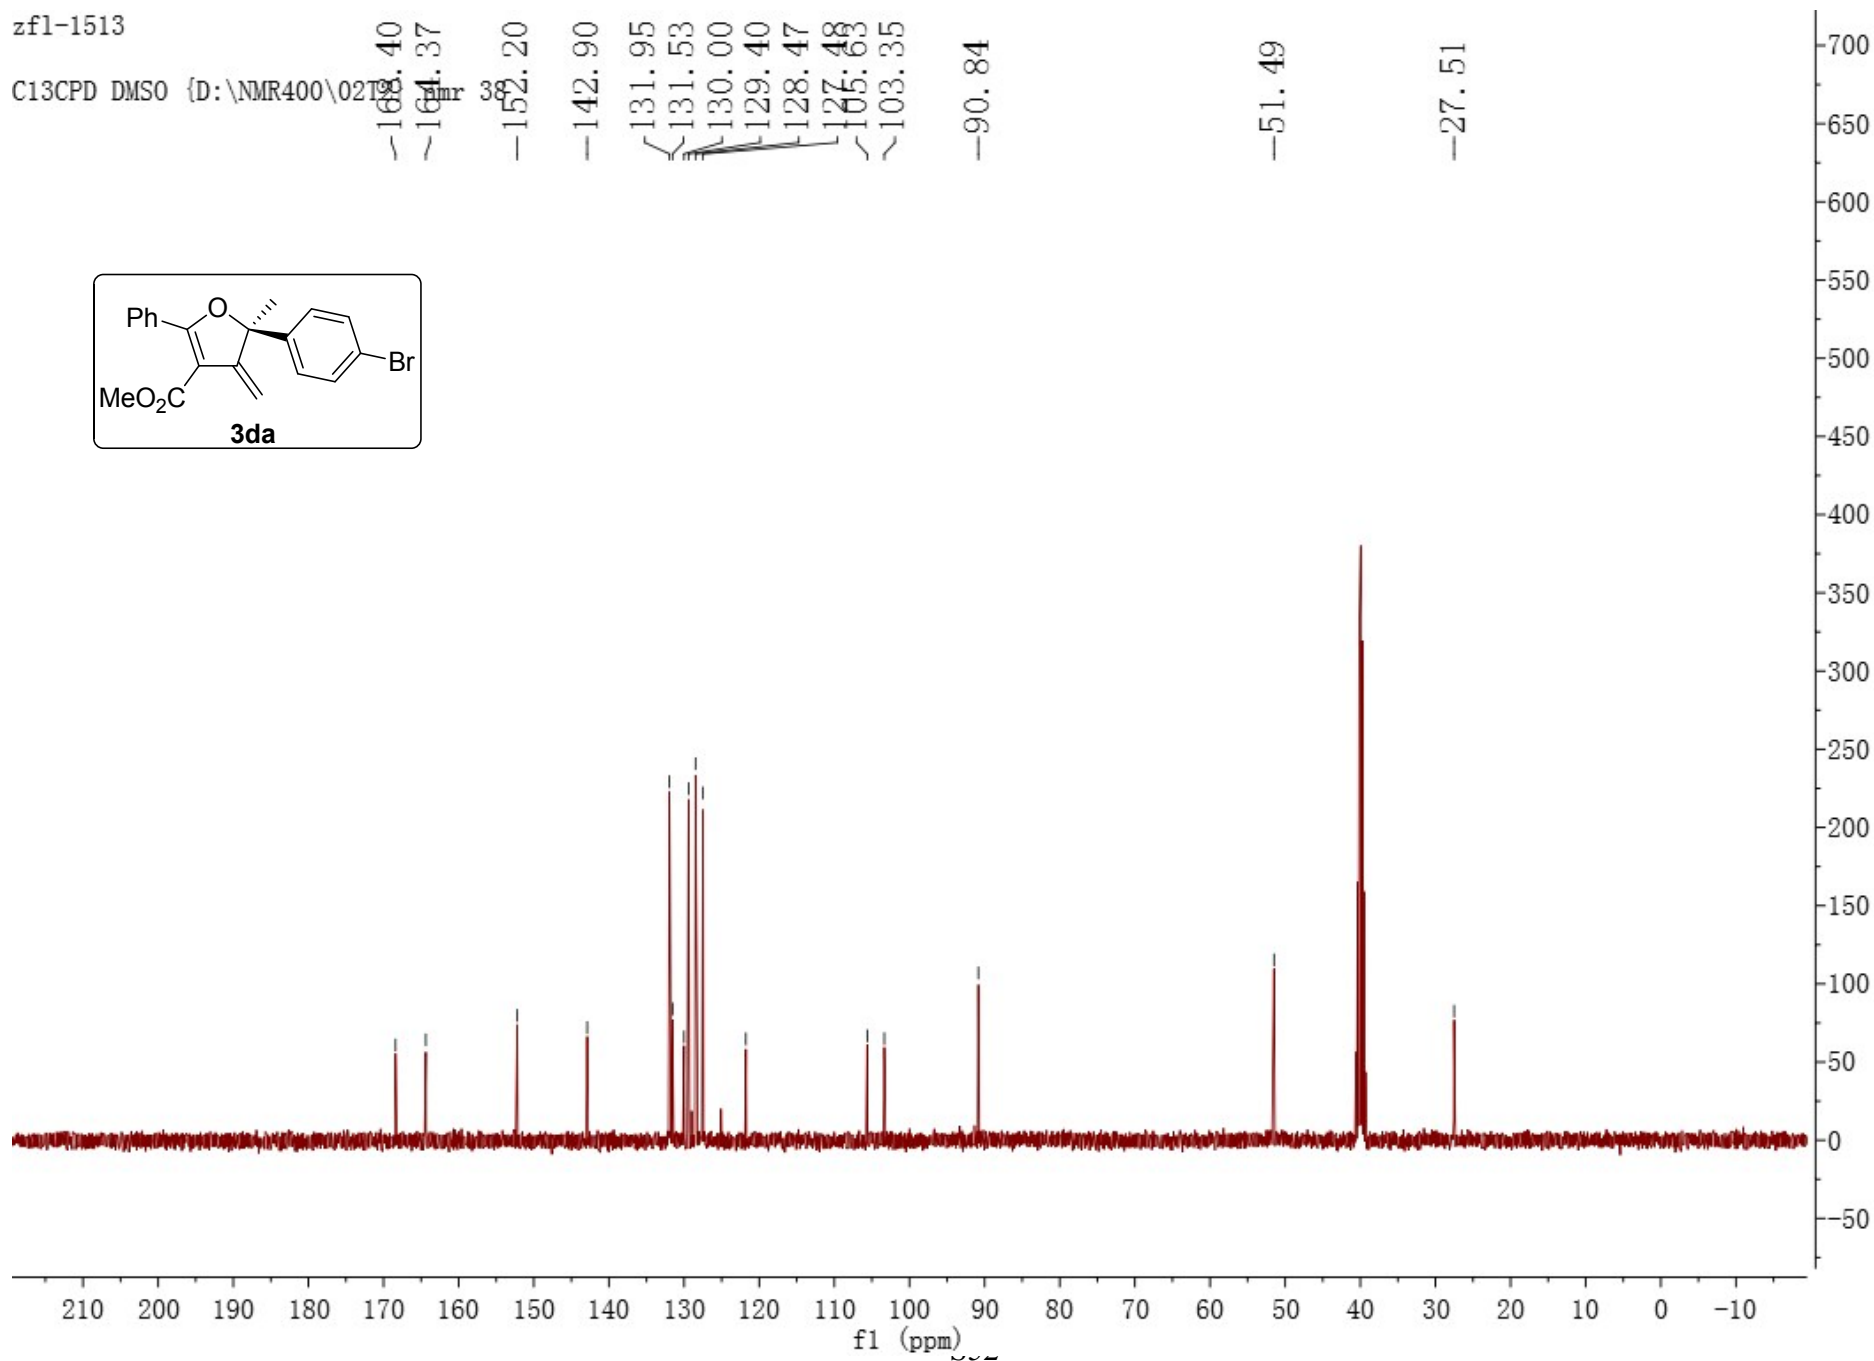

zfl-1541

PROTON DMSO {D:\NMR400\02T29

7.73  
7.71  
7.71  
7.53  
7.53  
7.50  
7.50  
7.49  
7.47  
7.45  
7.45

-5.53

-4.86

-3.63

-1.85

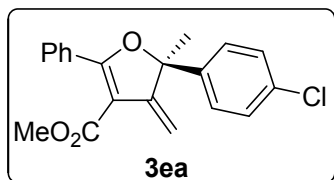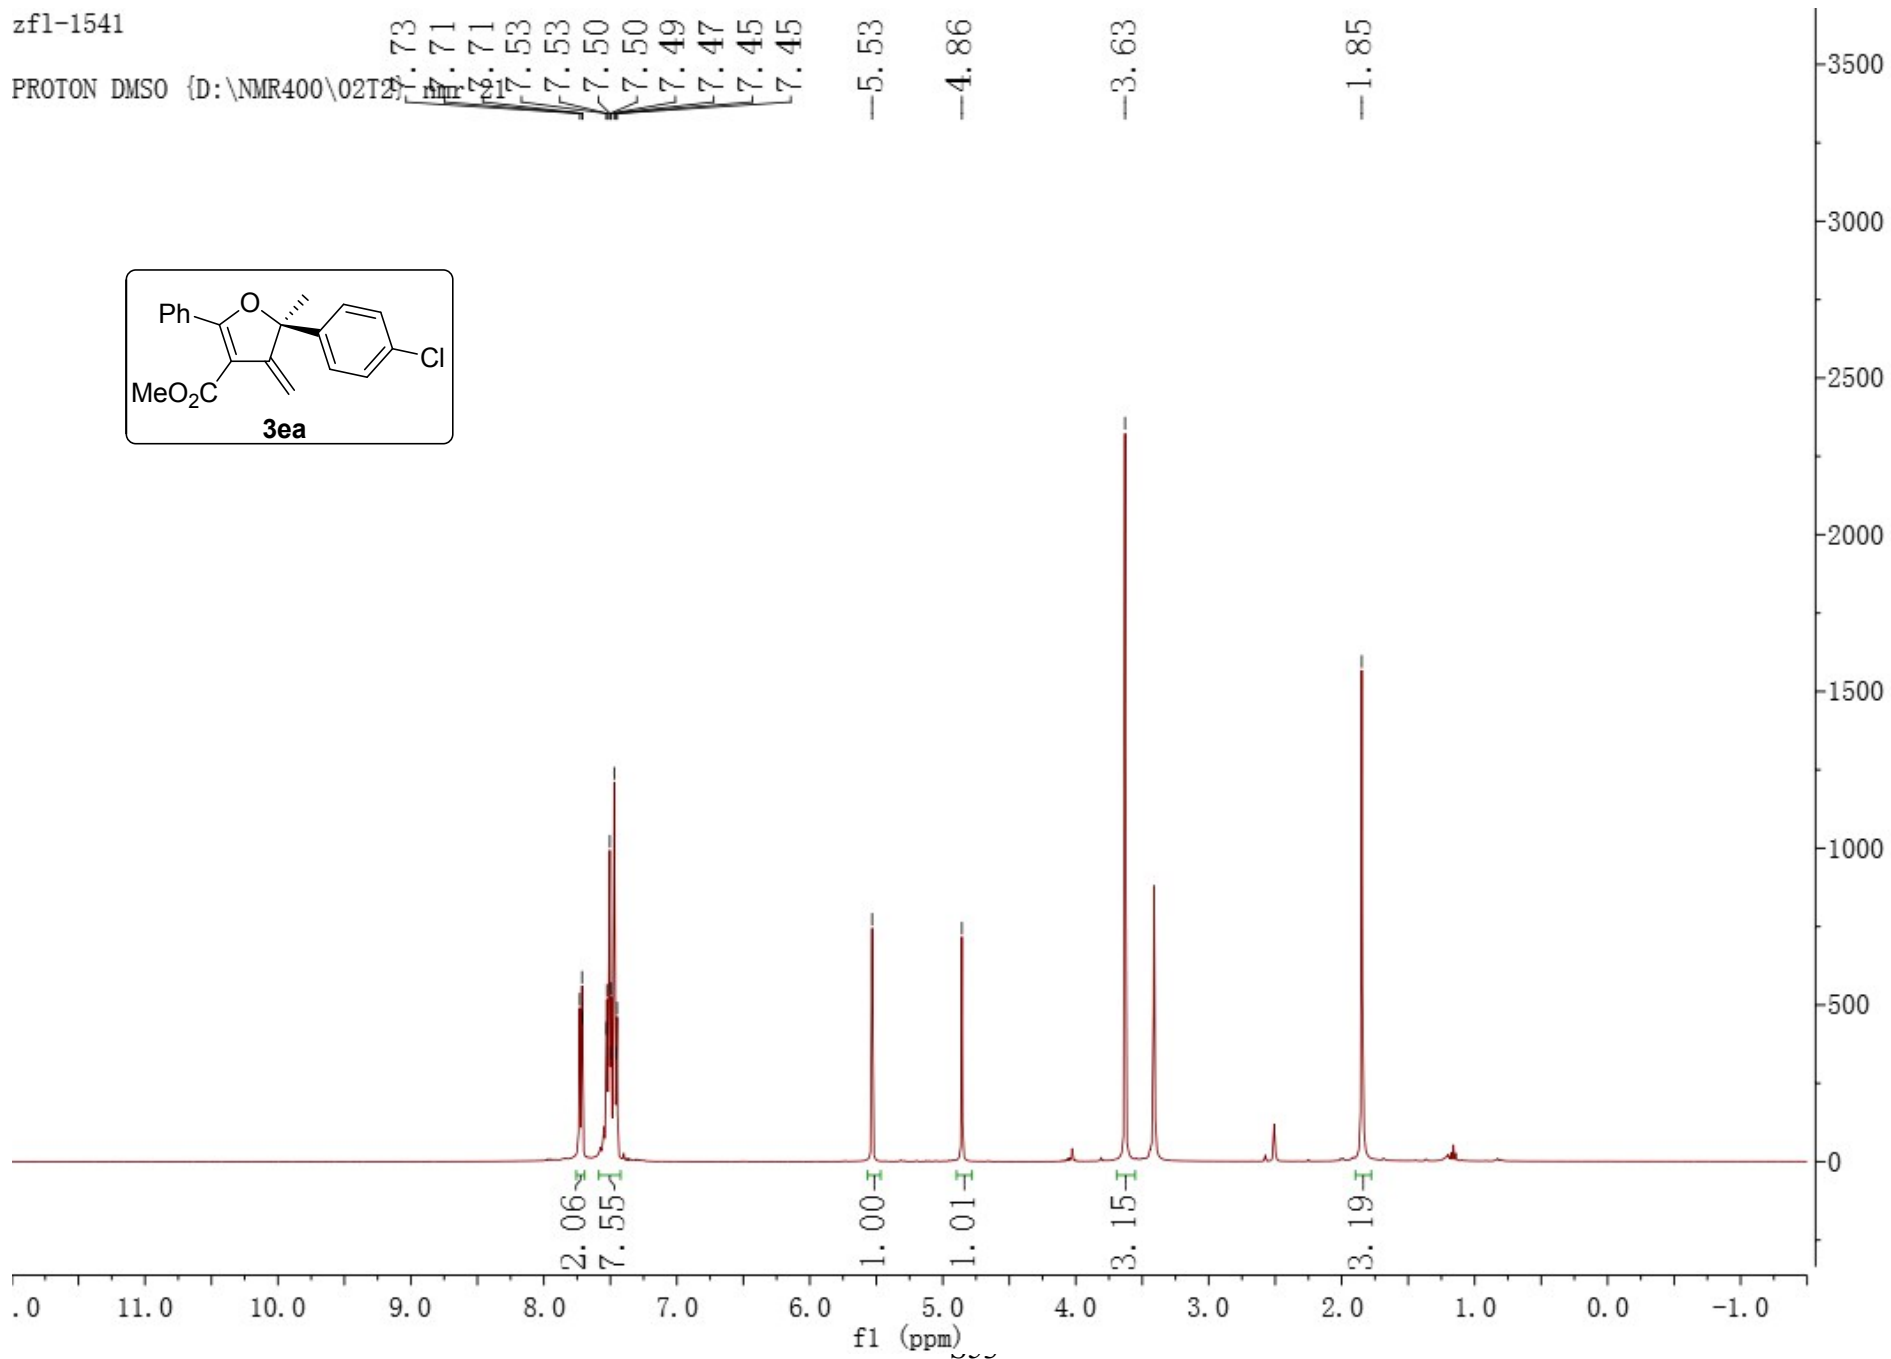

zfl-1541

C13CPD DMSO

{D:\NMR400\0219

169.39  
164.37  
152.28  
142.47  
133.19  
131.52  
130.03  
129.41  
129.01  
128.46  
127.17

105.64  
103.33

90.80

51.47

27.56

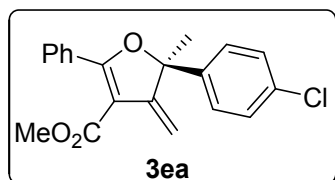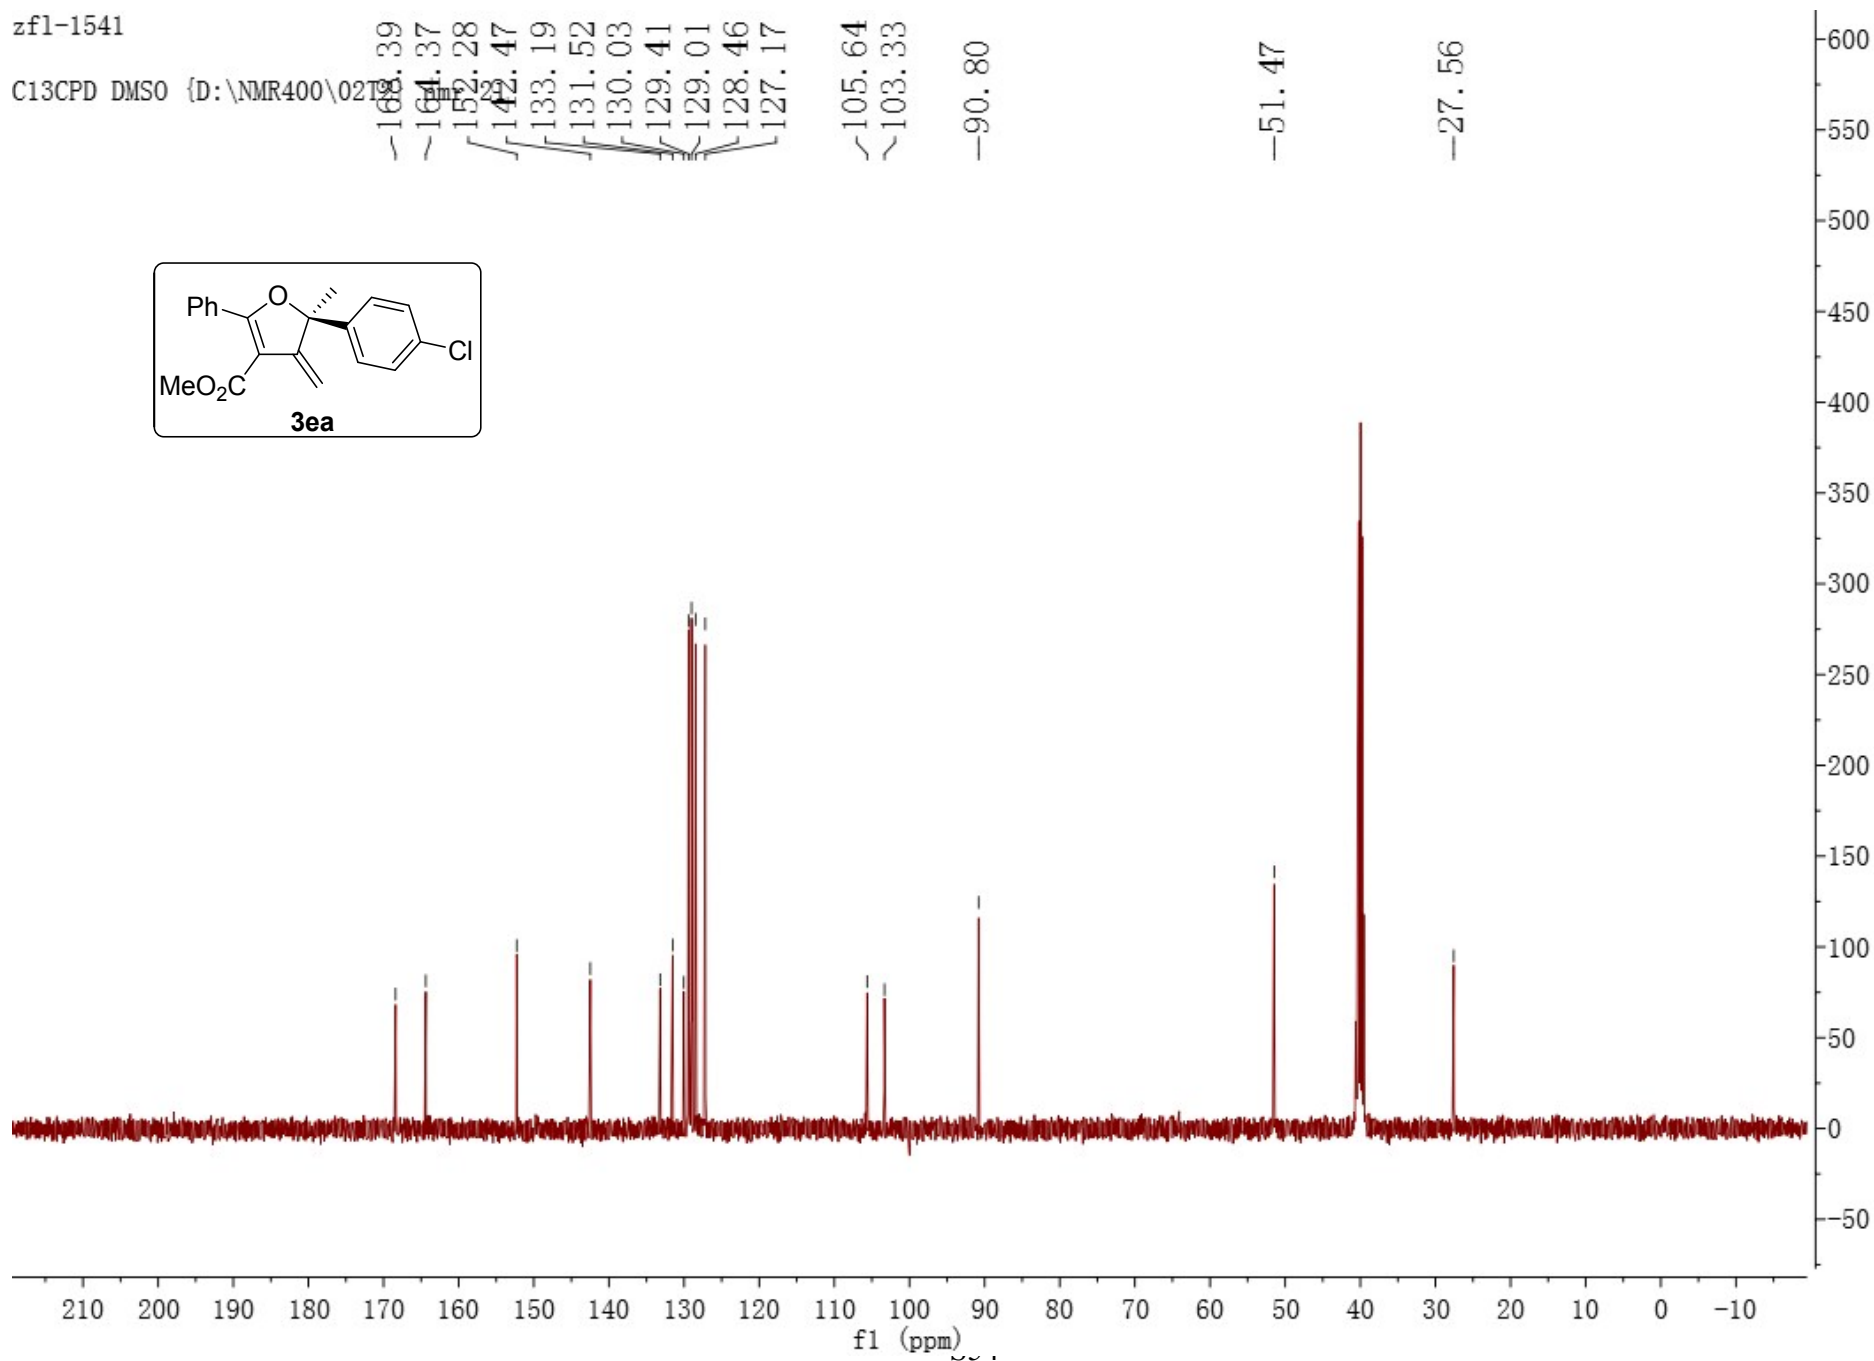

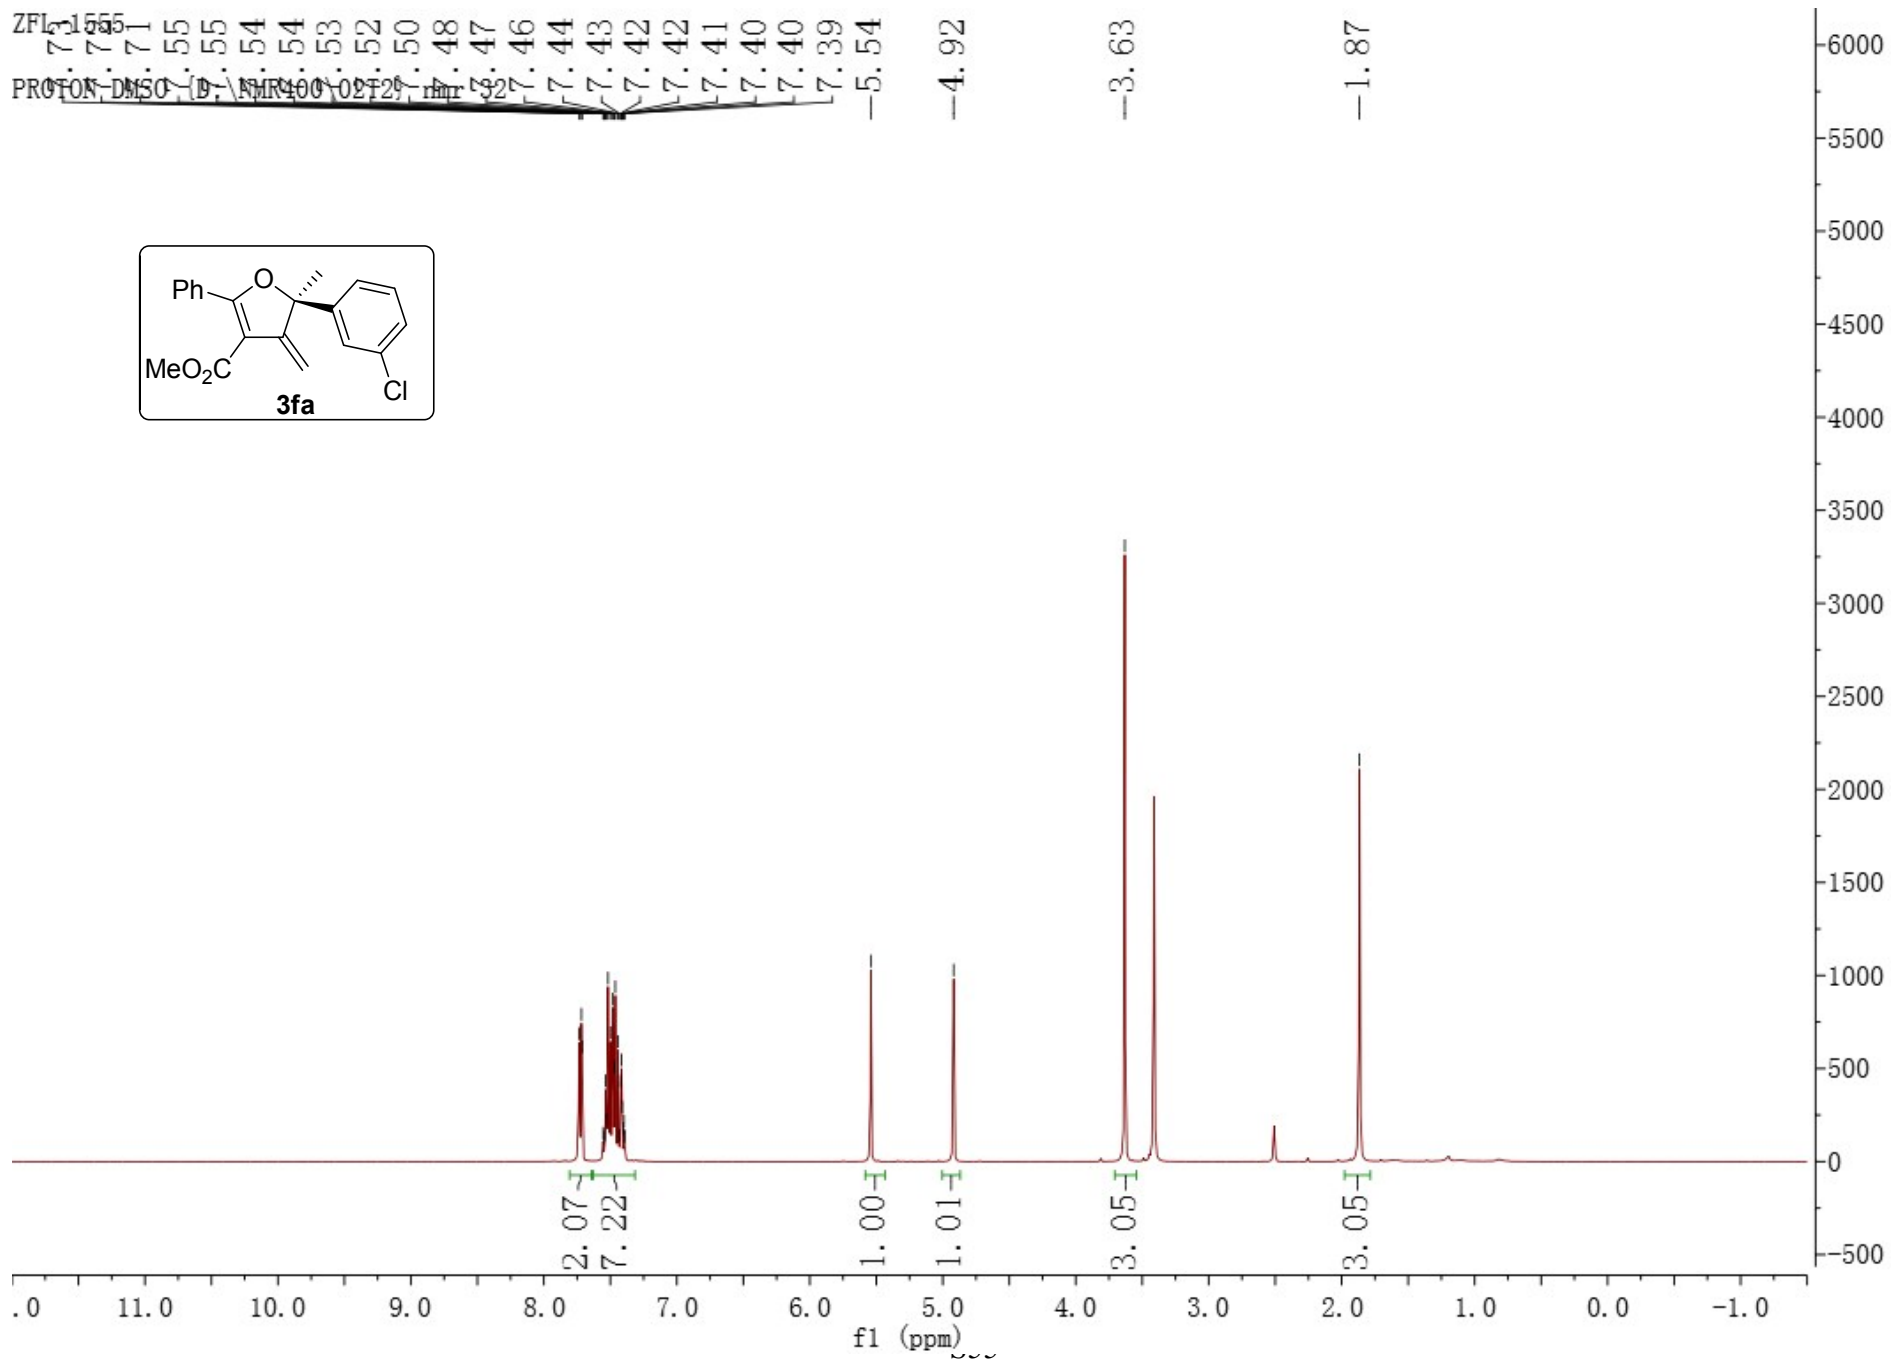

ZFL-1555

C13CPD DMSO {D:\NMR400\0219

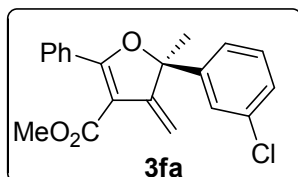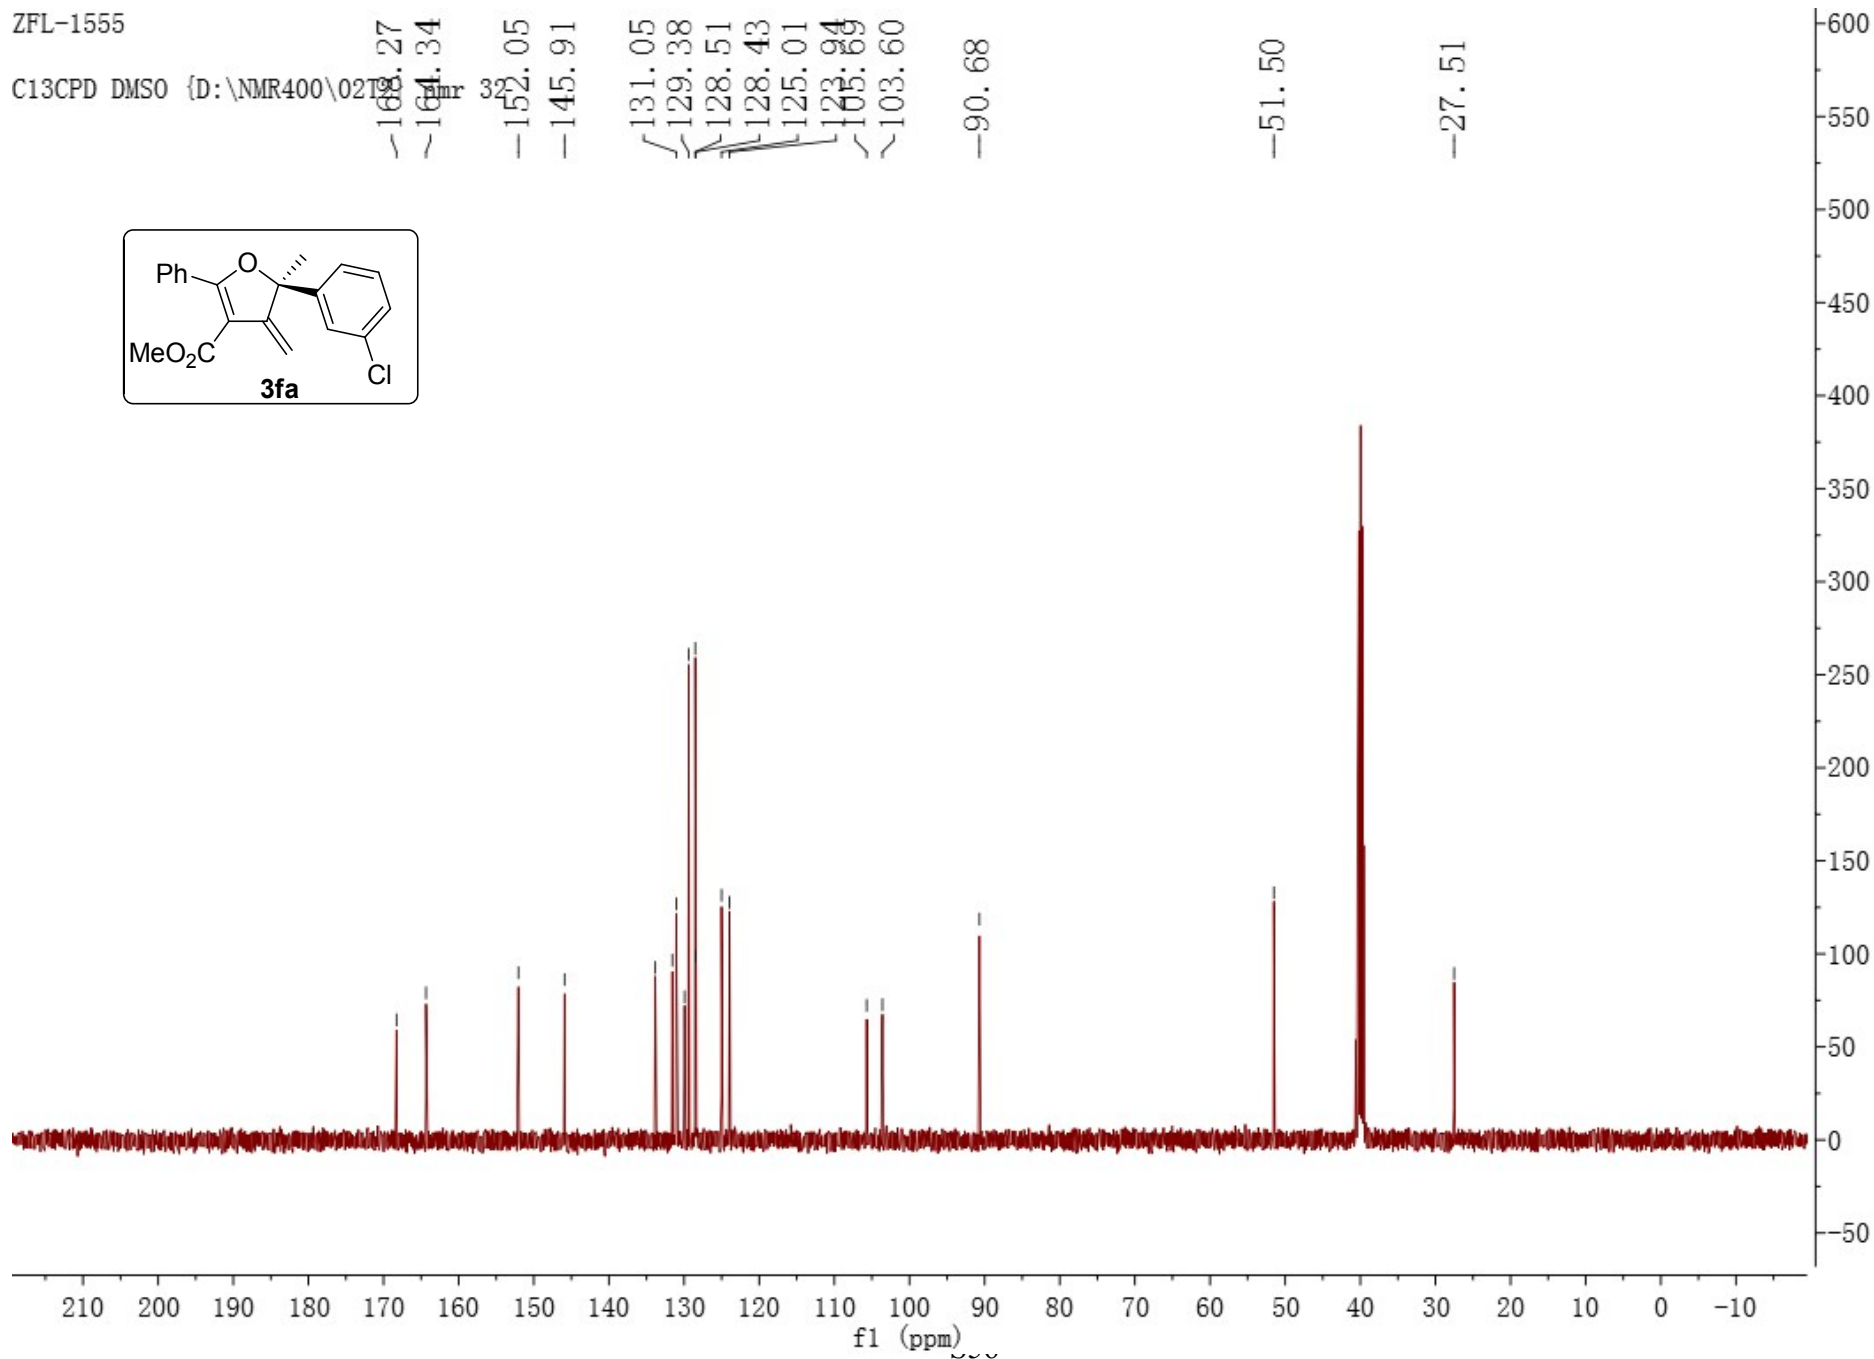

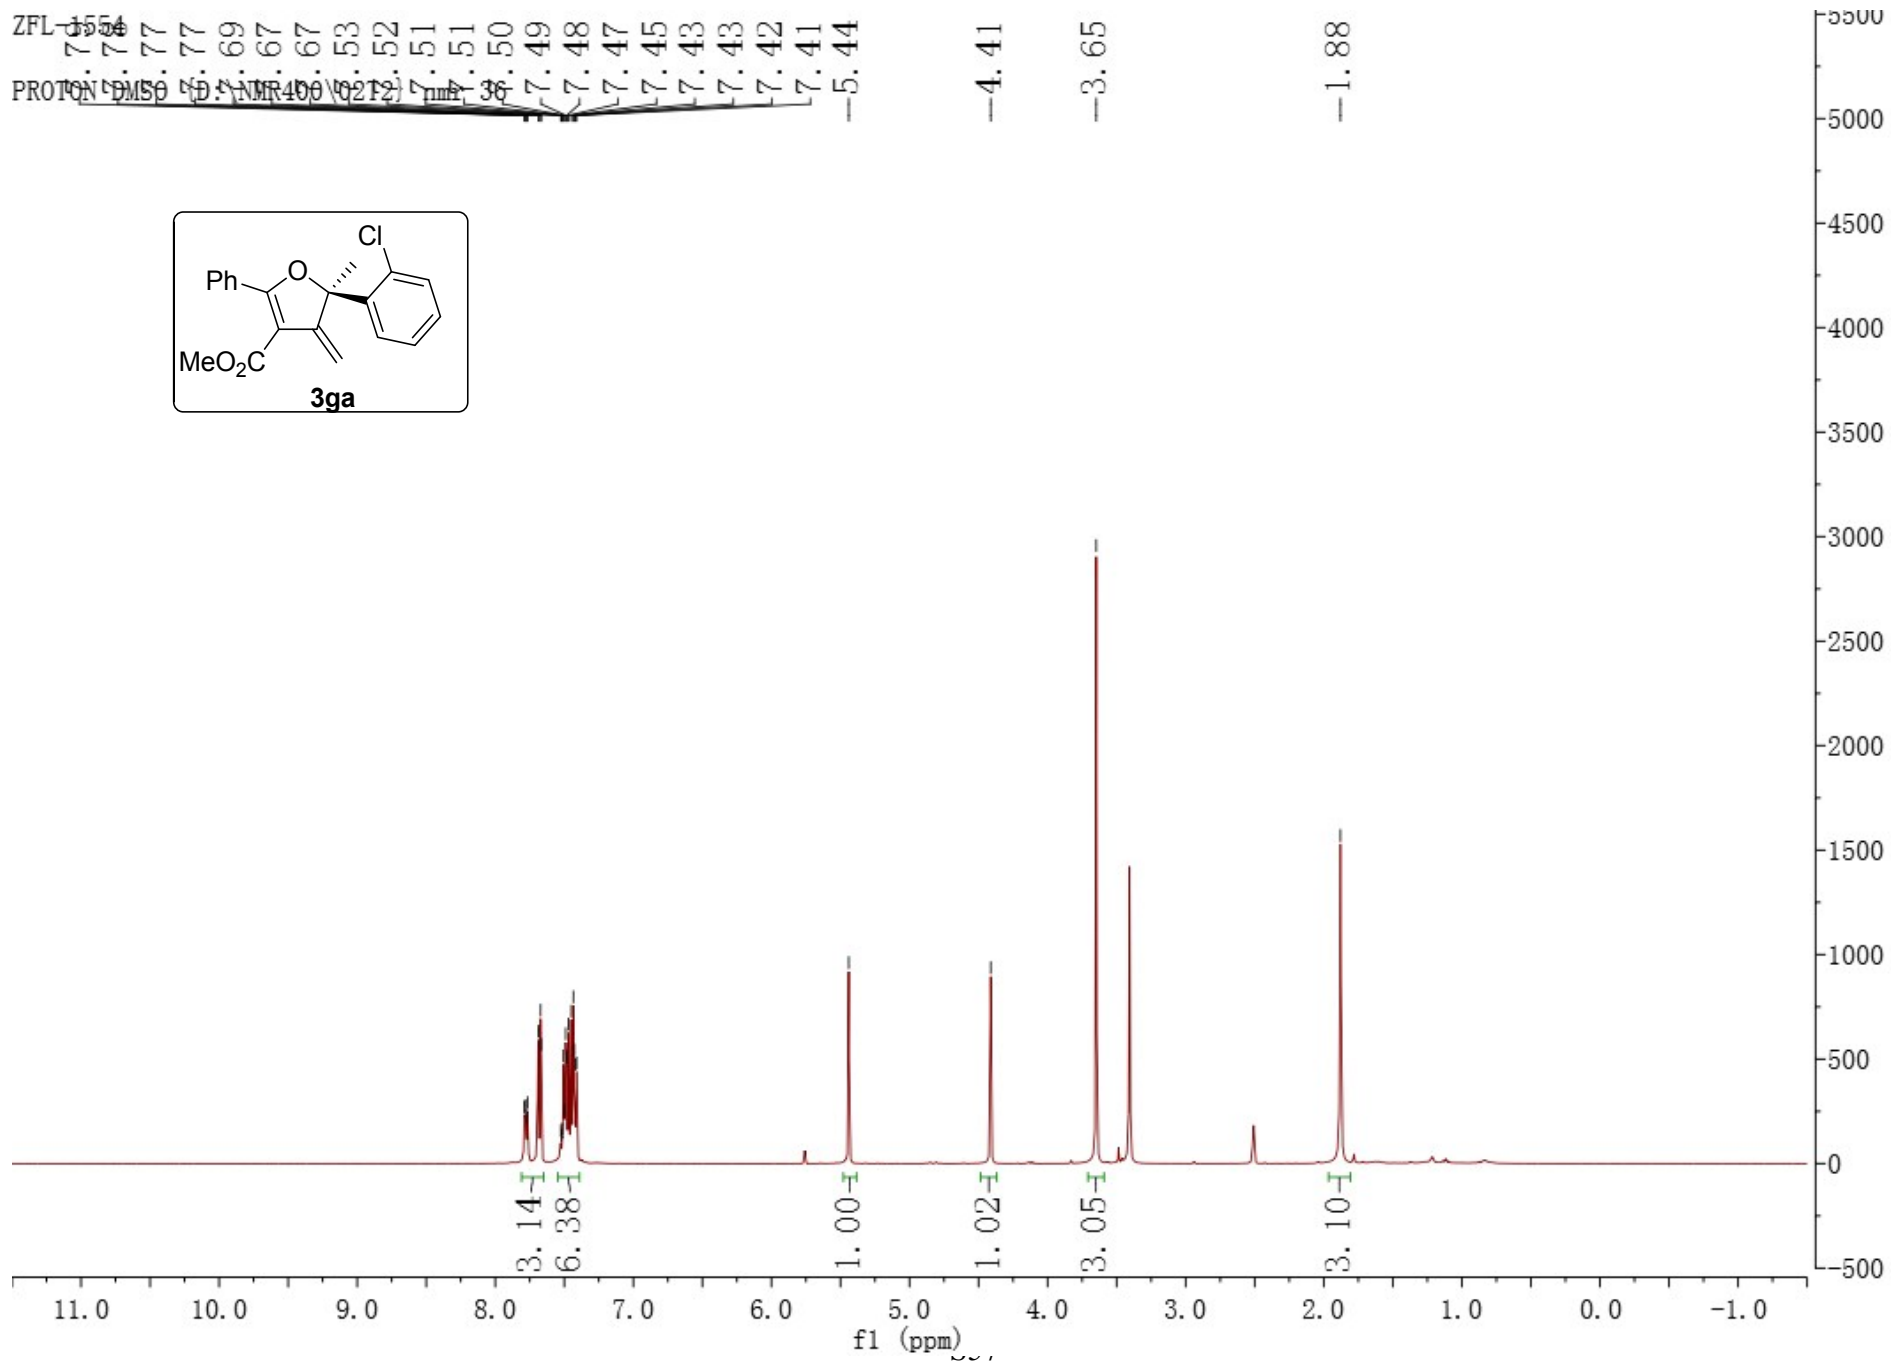

ZFL-1554

C13CPD DMSO {D:\NMR400\0219\}

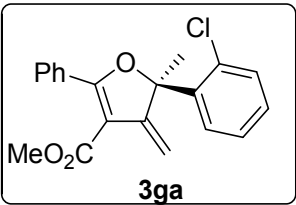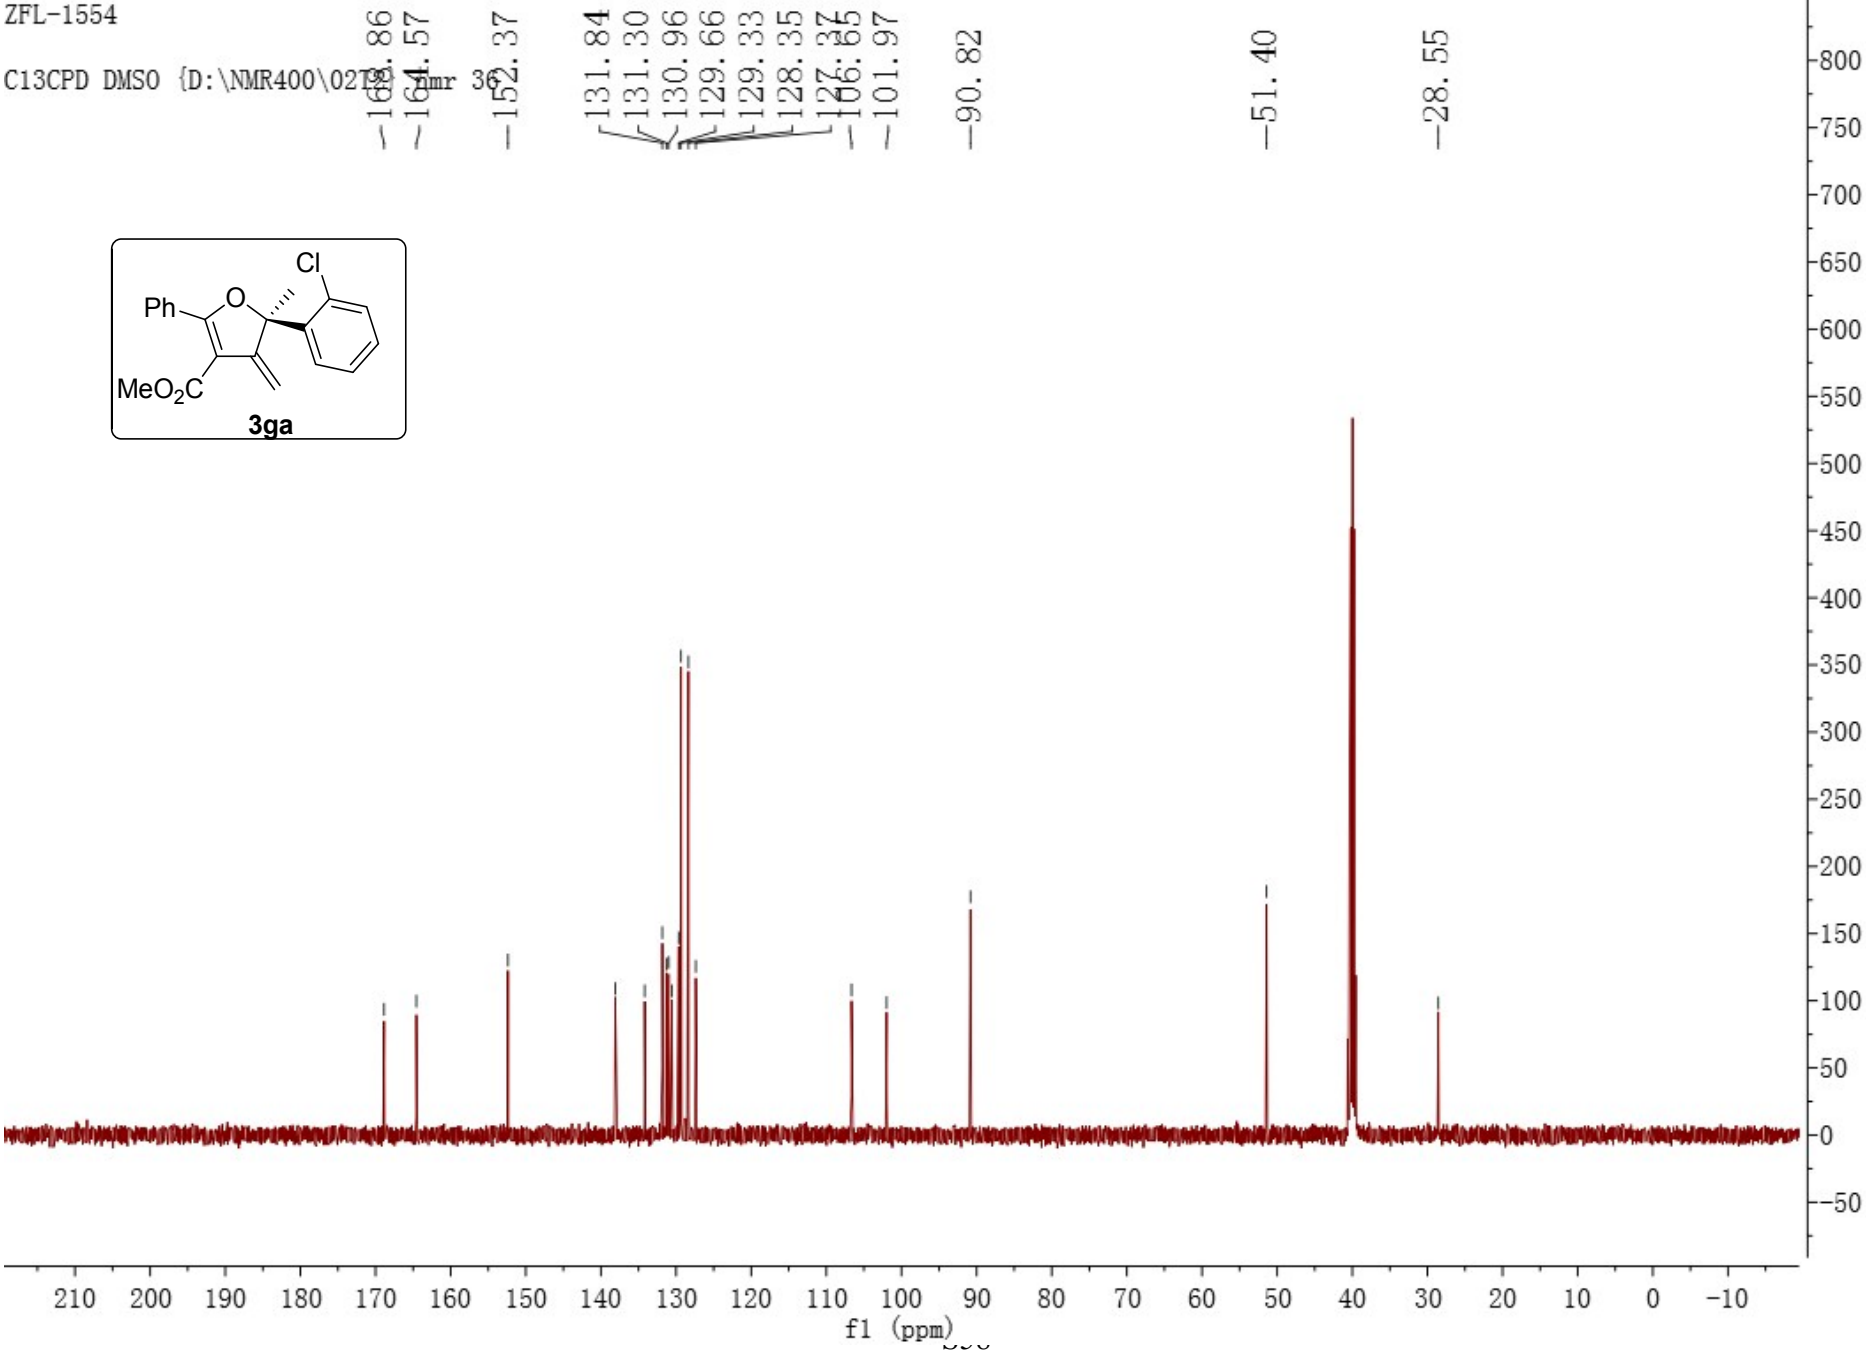



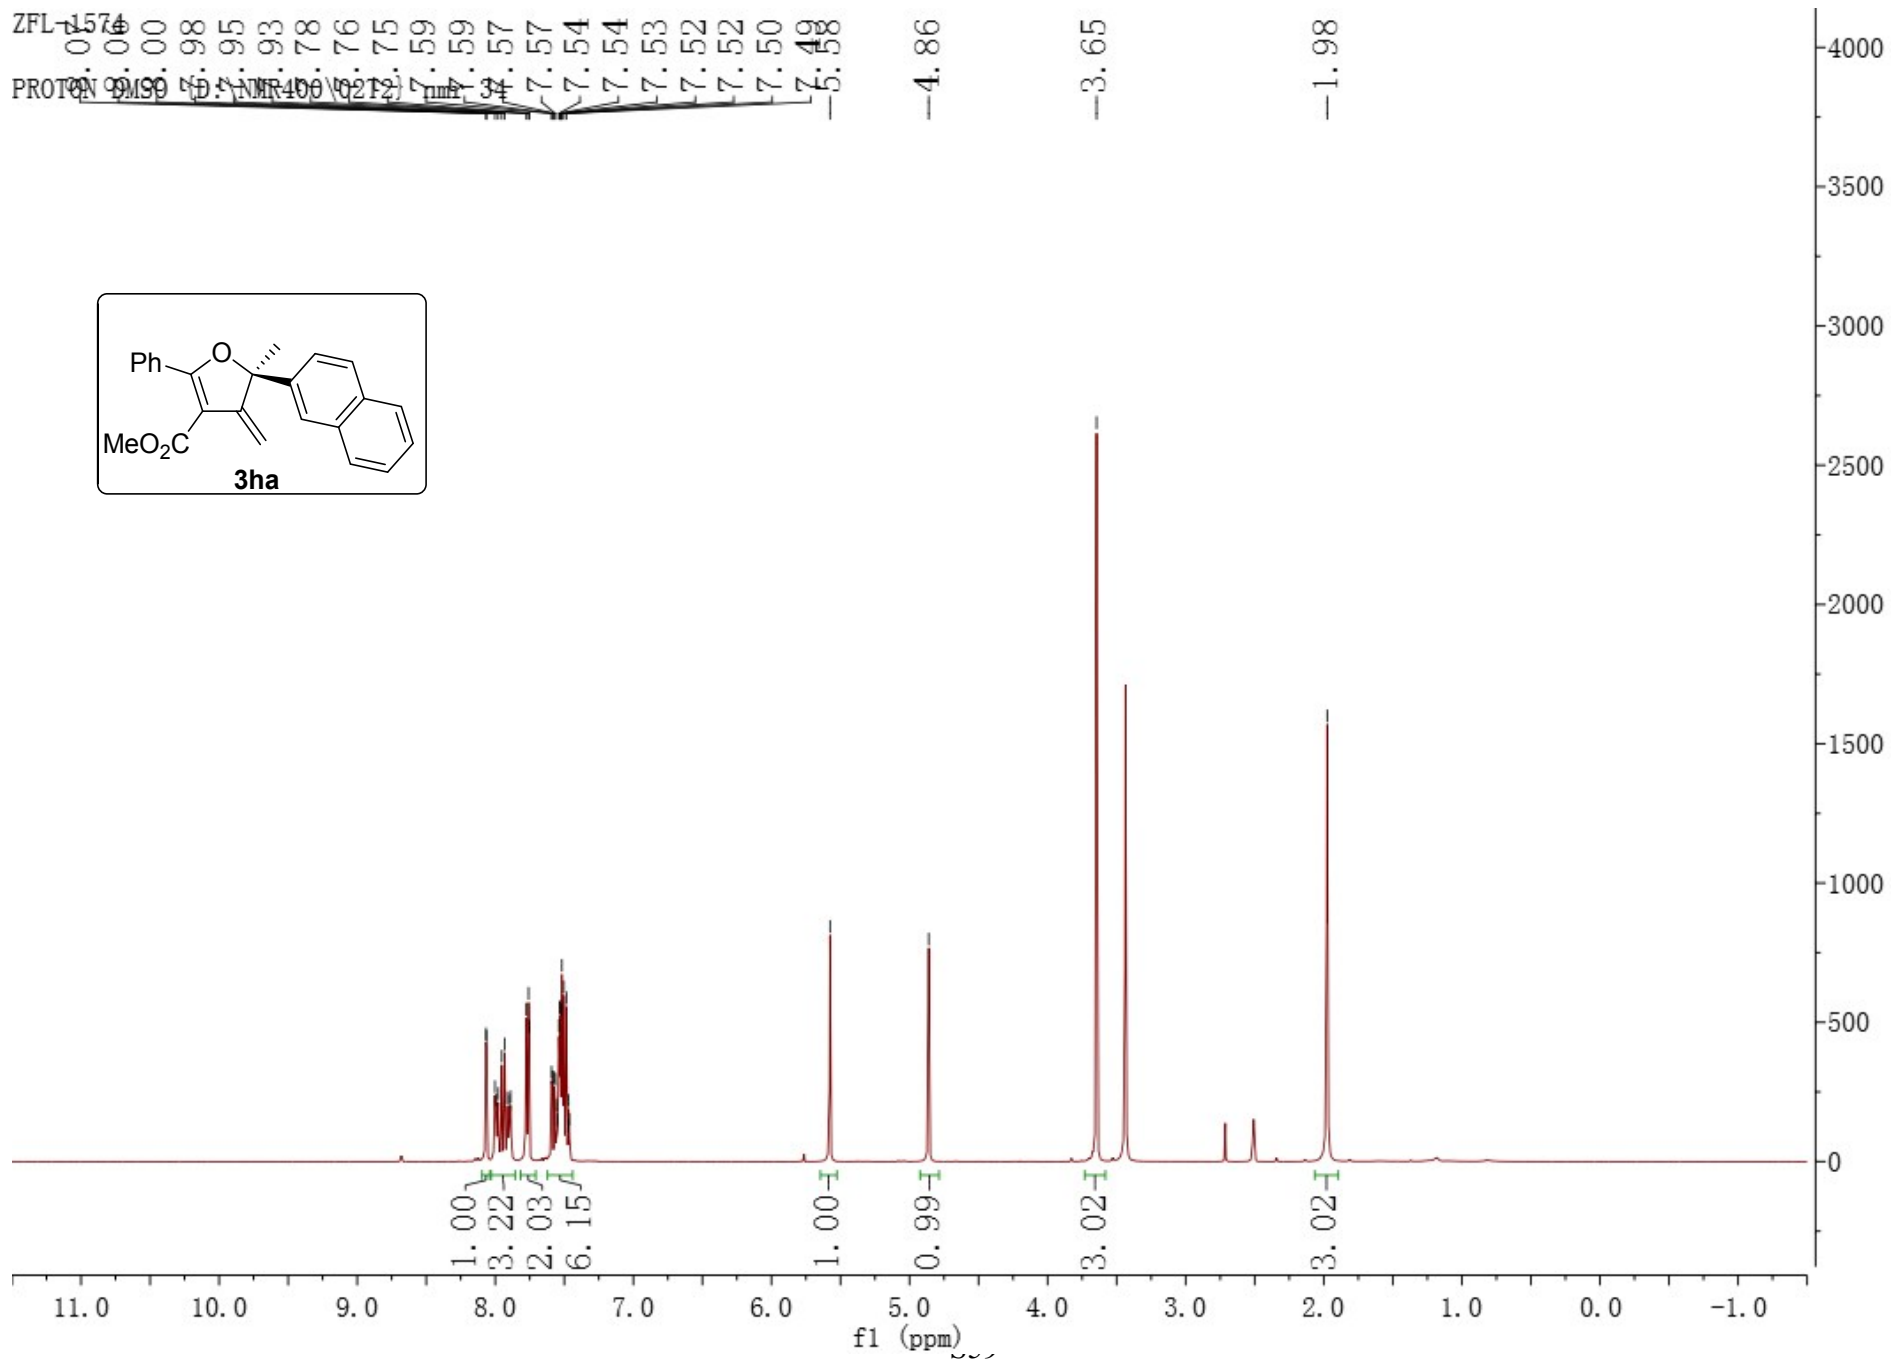

ZFL-1574

C13CPD DMSO {D:\NMR400\0219

169.75  
164.51

152.56

129.48

128.81

128.48

127.85

126.91

123.86

123.72

103.30

-91.57

-51.46

-27.59

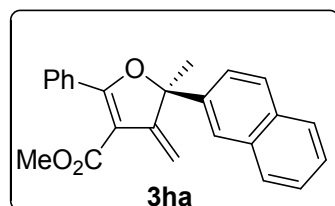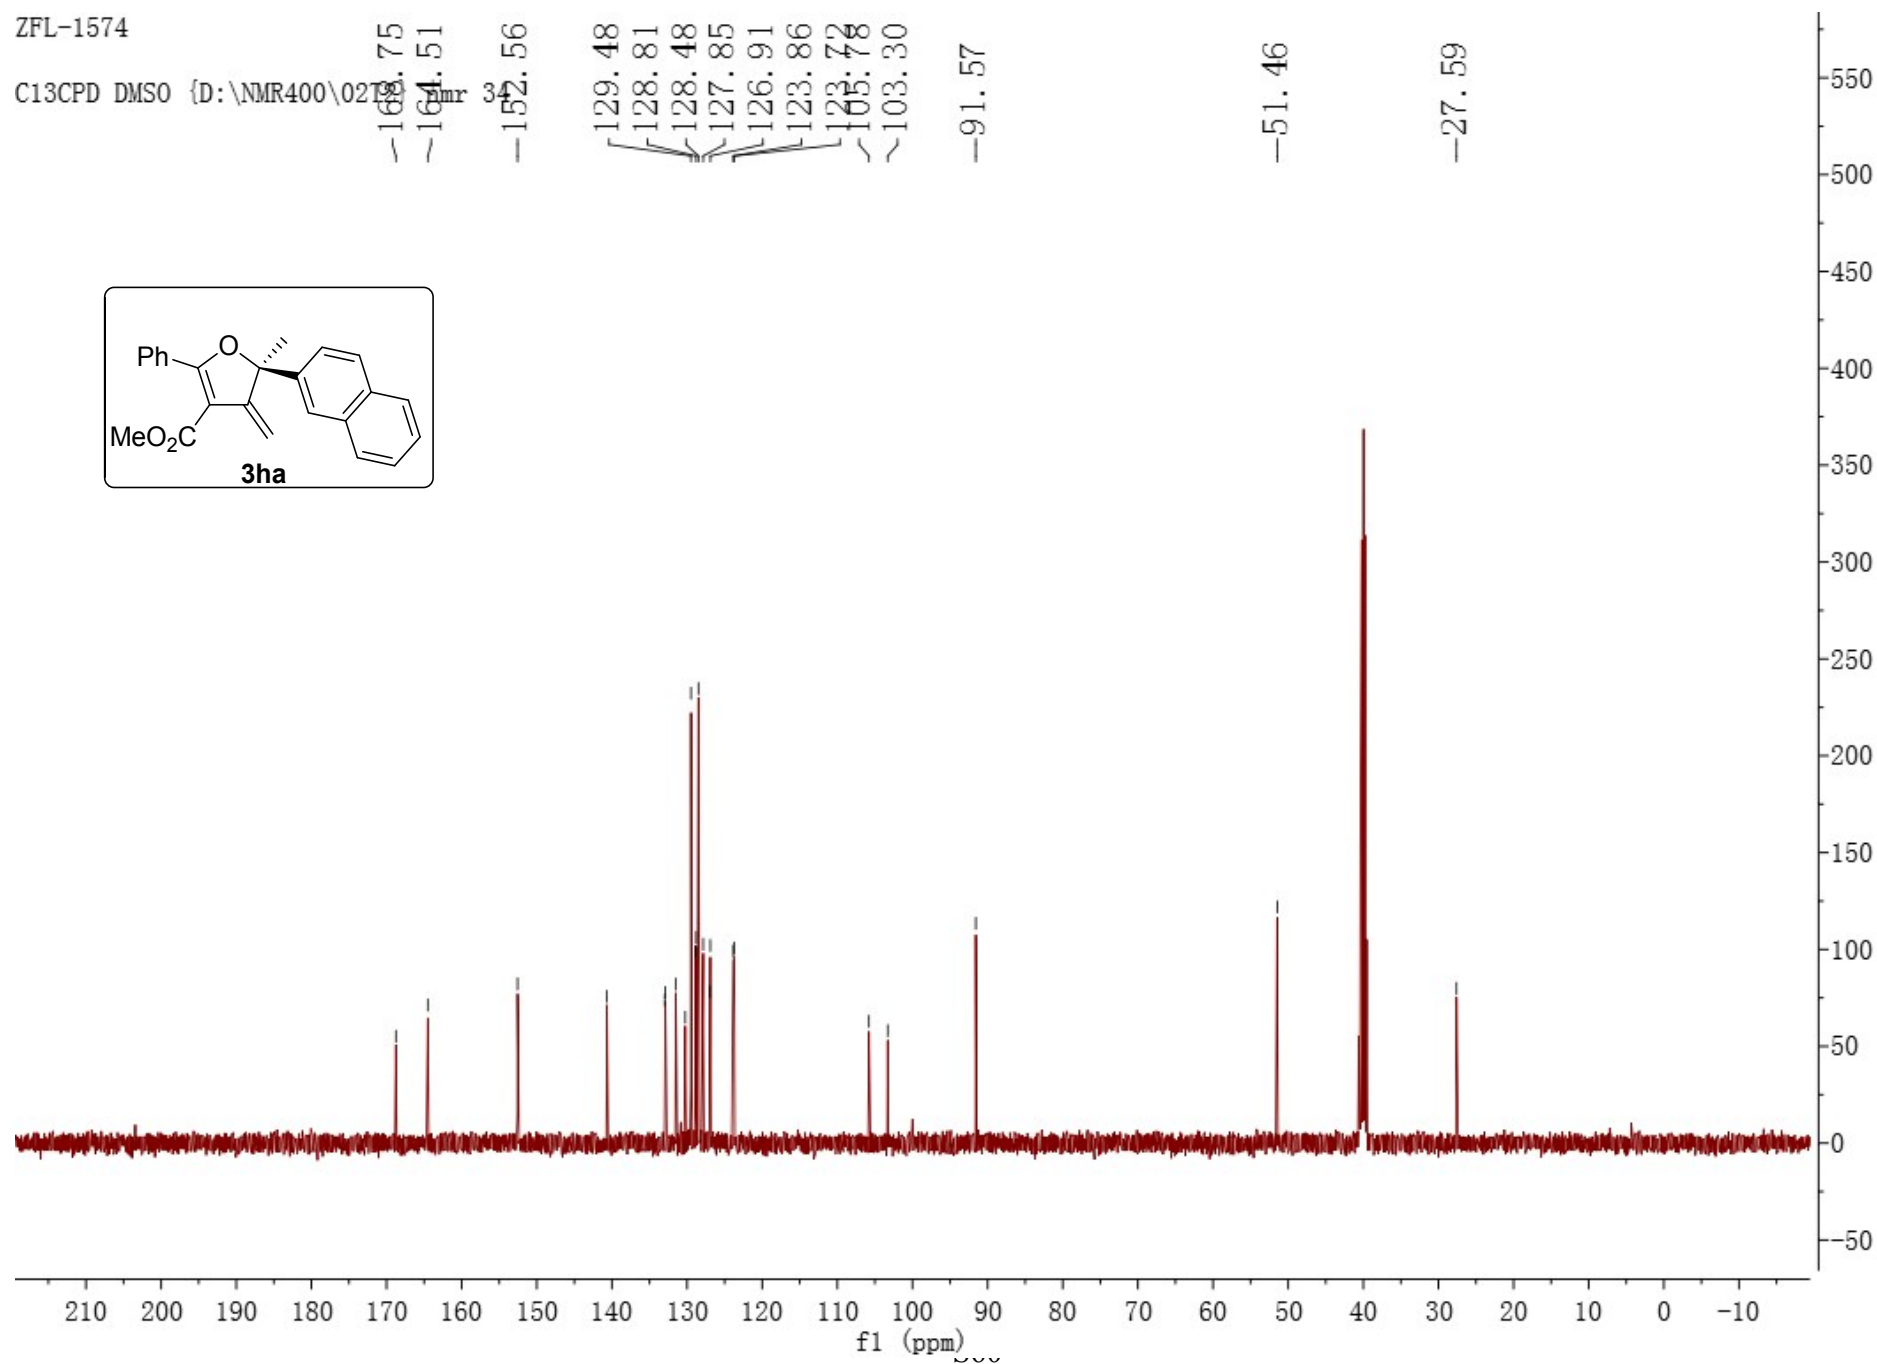

ZFL-1627

PROTON DMSO

7.0  
7.0  
6.64  
6.63  
6.62  
6.53  
6.52  
6.51  
6.49  
6.47  
6.45  
6.43

6.56  
6.56  
6.48  
6.47  
6.47

-4.73

-3.65

-1.83

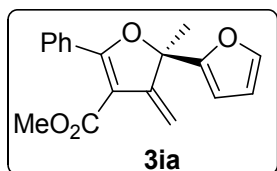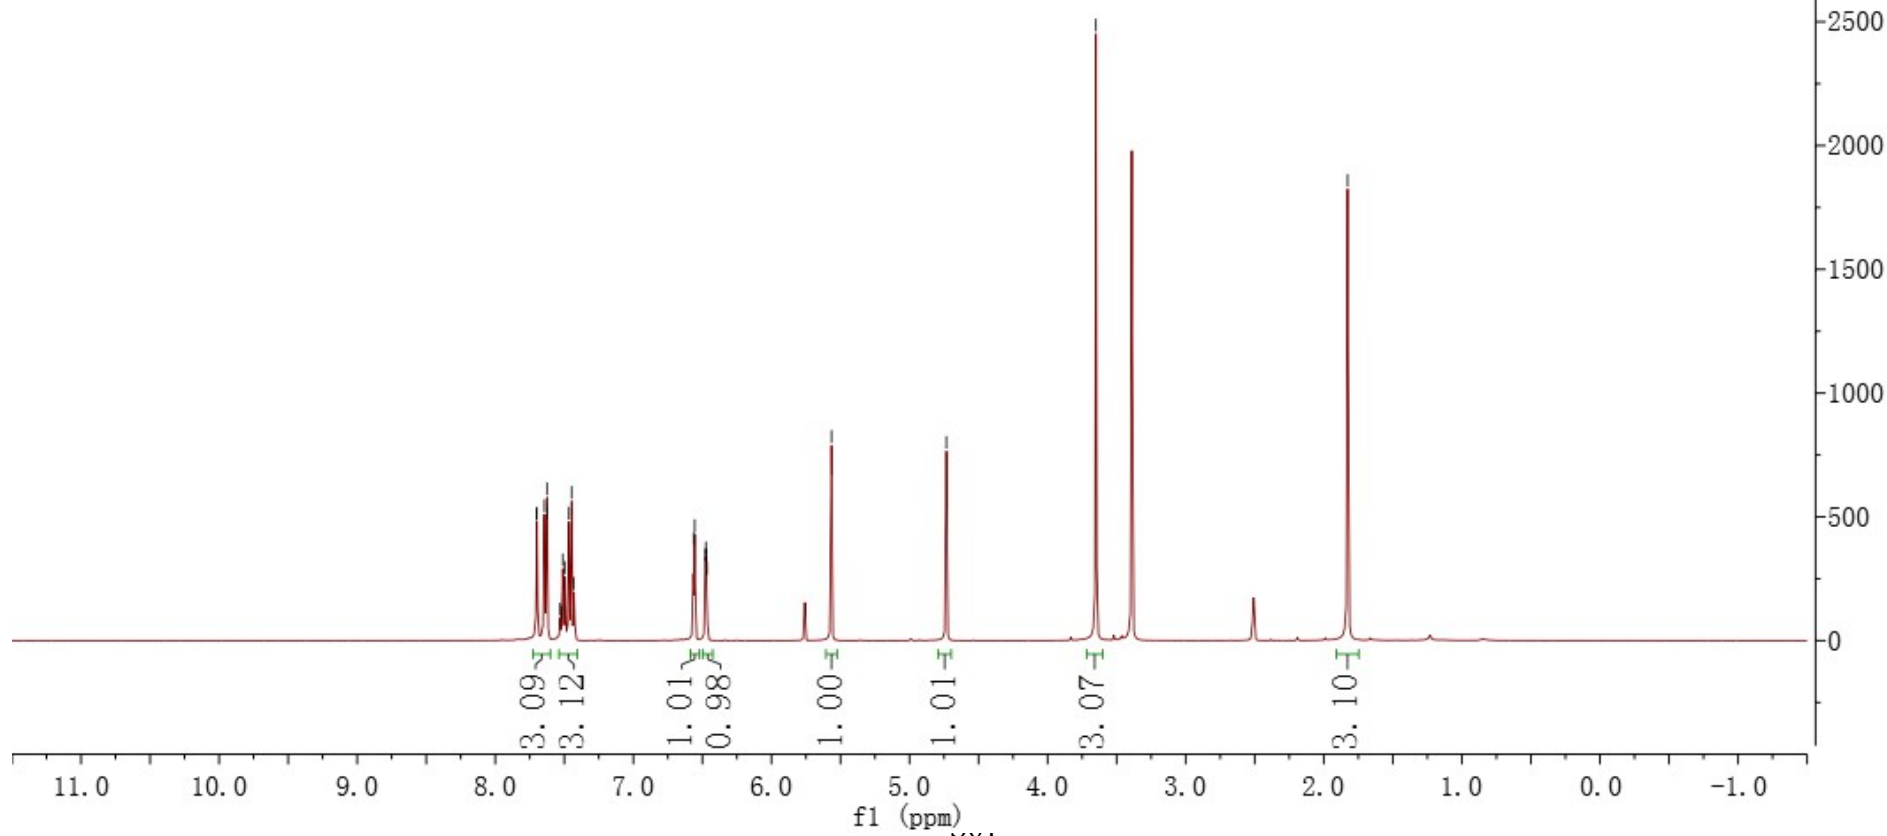

ZFL-1627

C13CPD DMSO

{D:\NMR400\02T28

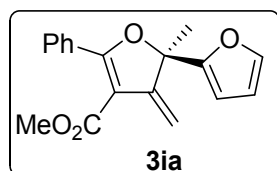

**3ia**

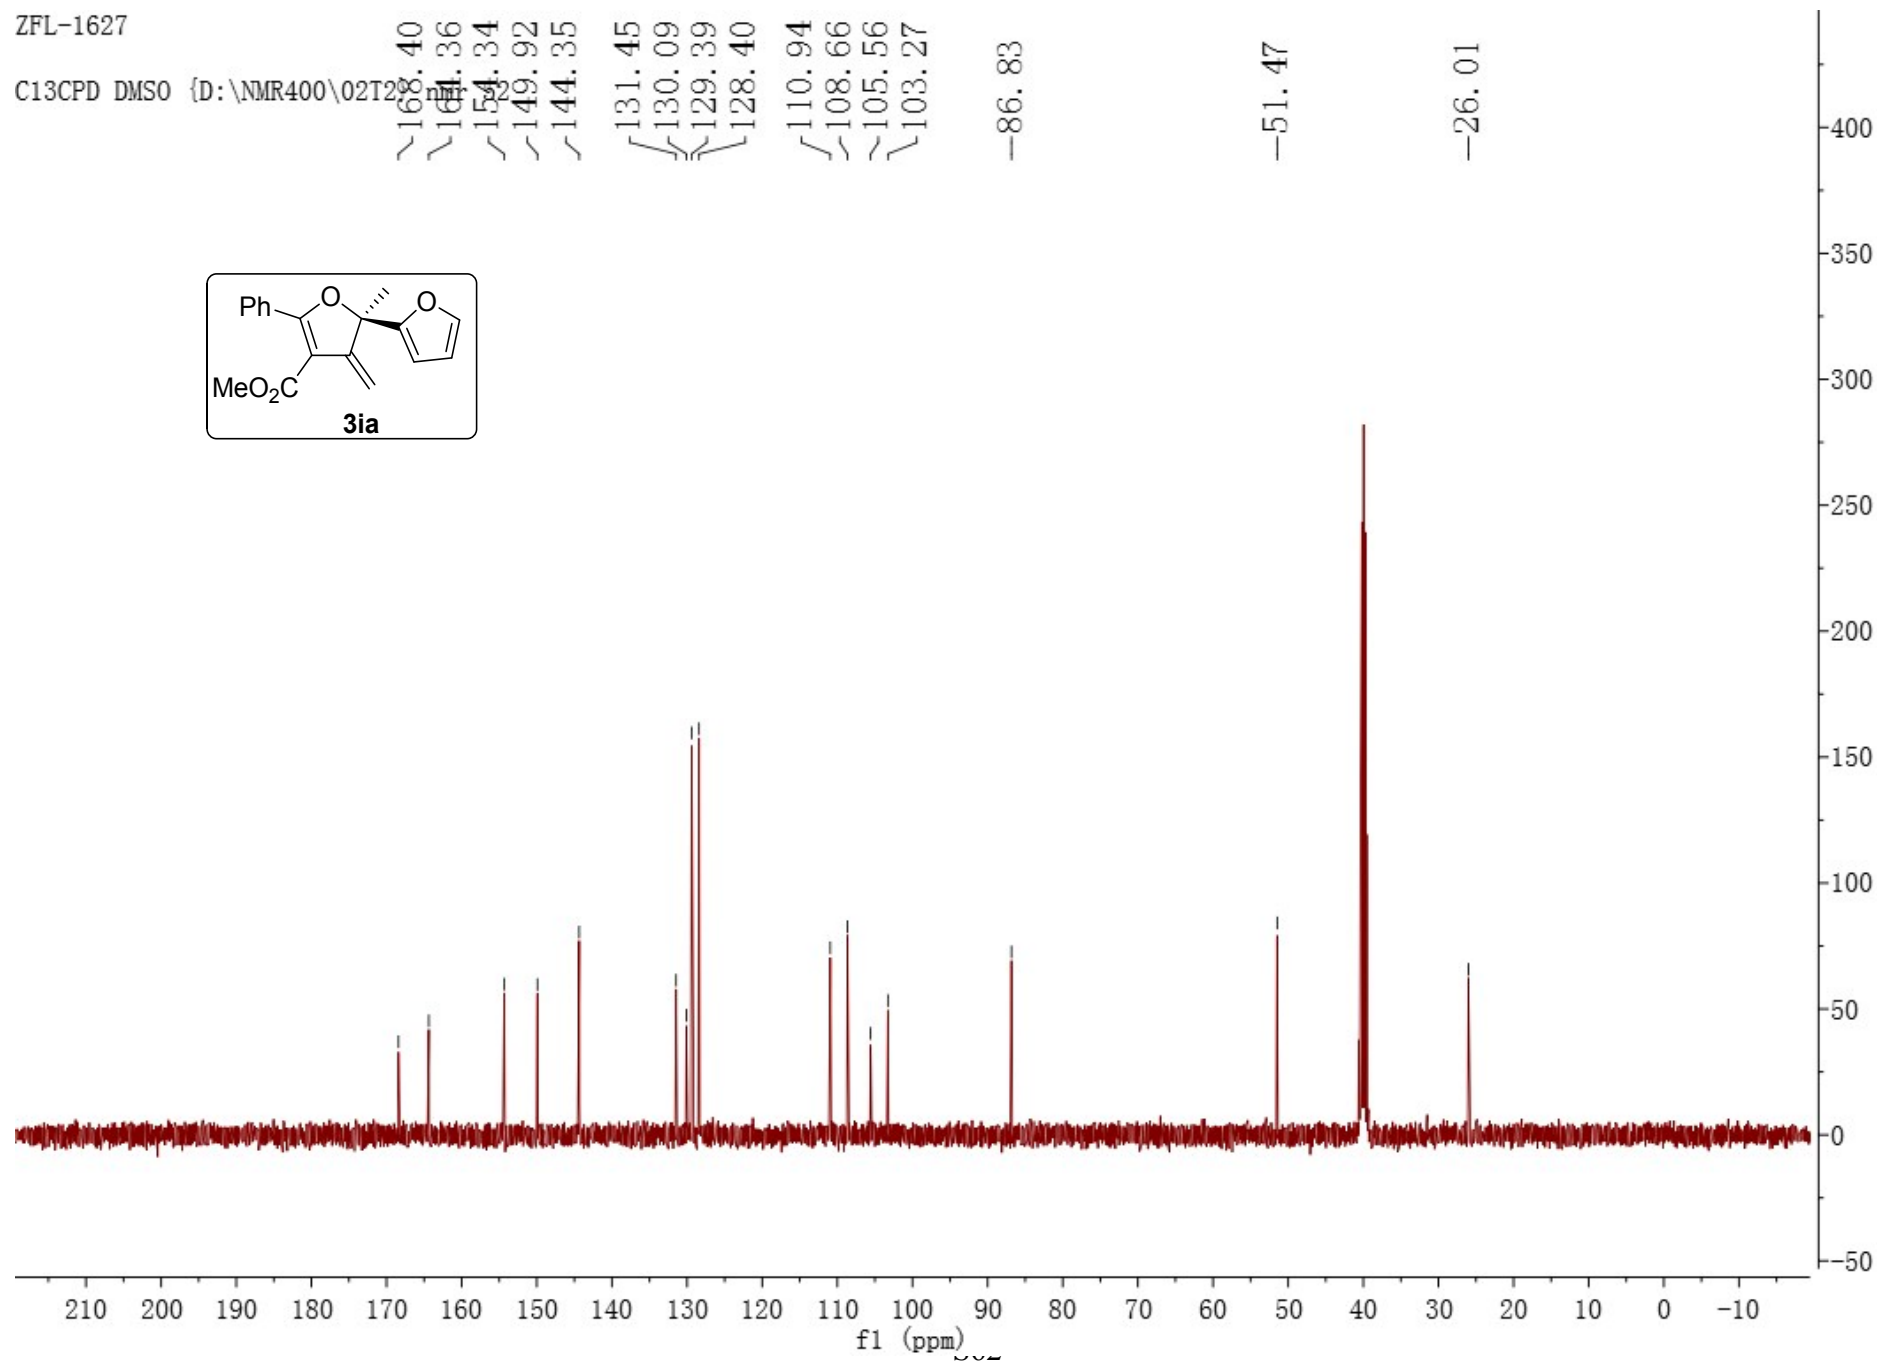



ZFL-1532

C13CPD DMSO {D:\NMR400\02133

169.02  
164.40  
150.65  
143.17  
131.47  
129.31  
129.03  
128.54  
128.14  
124.84  
106.47  
102.87  
93.99

-51.42

-33.42

-8.29

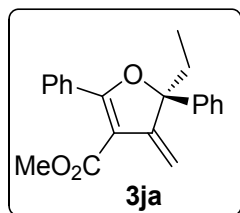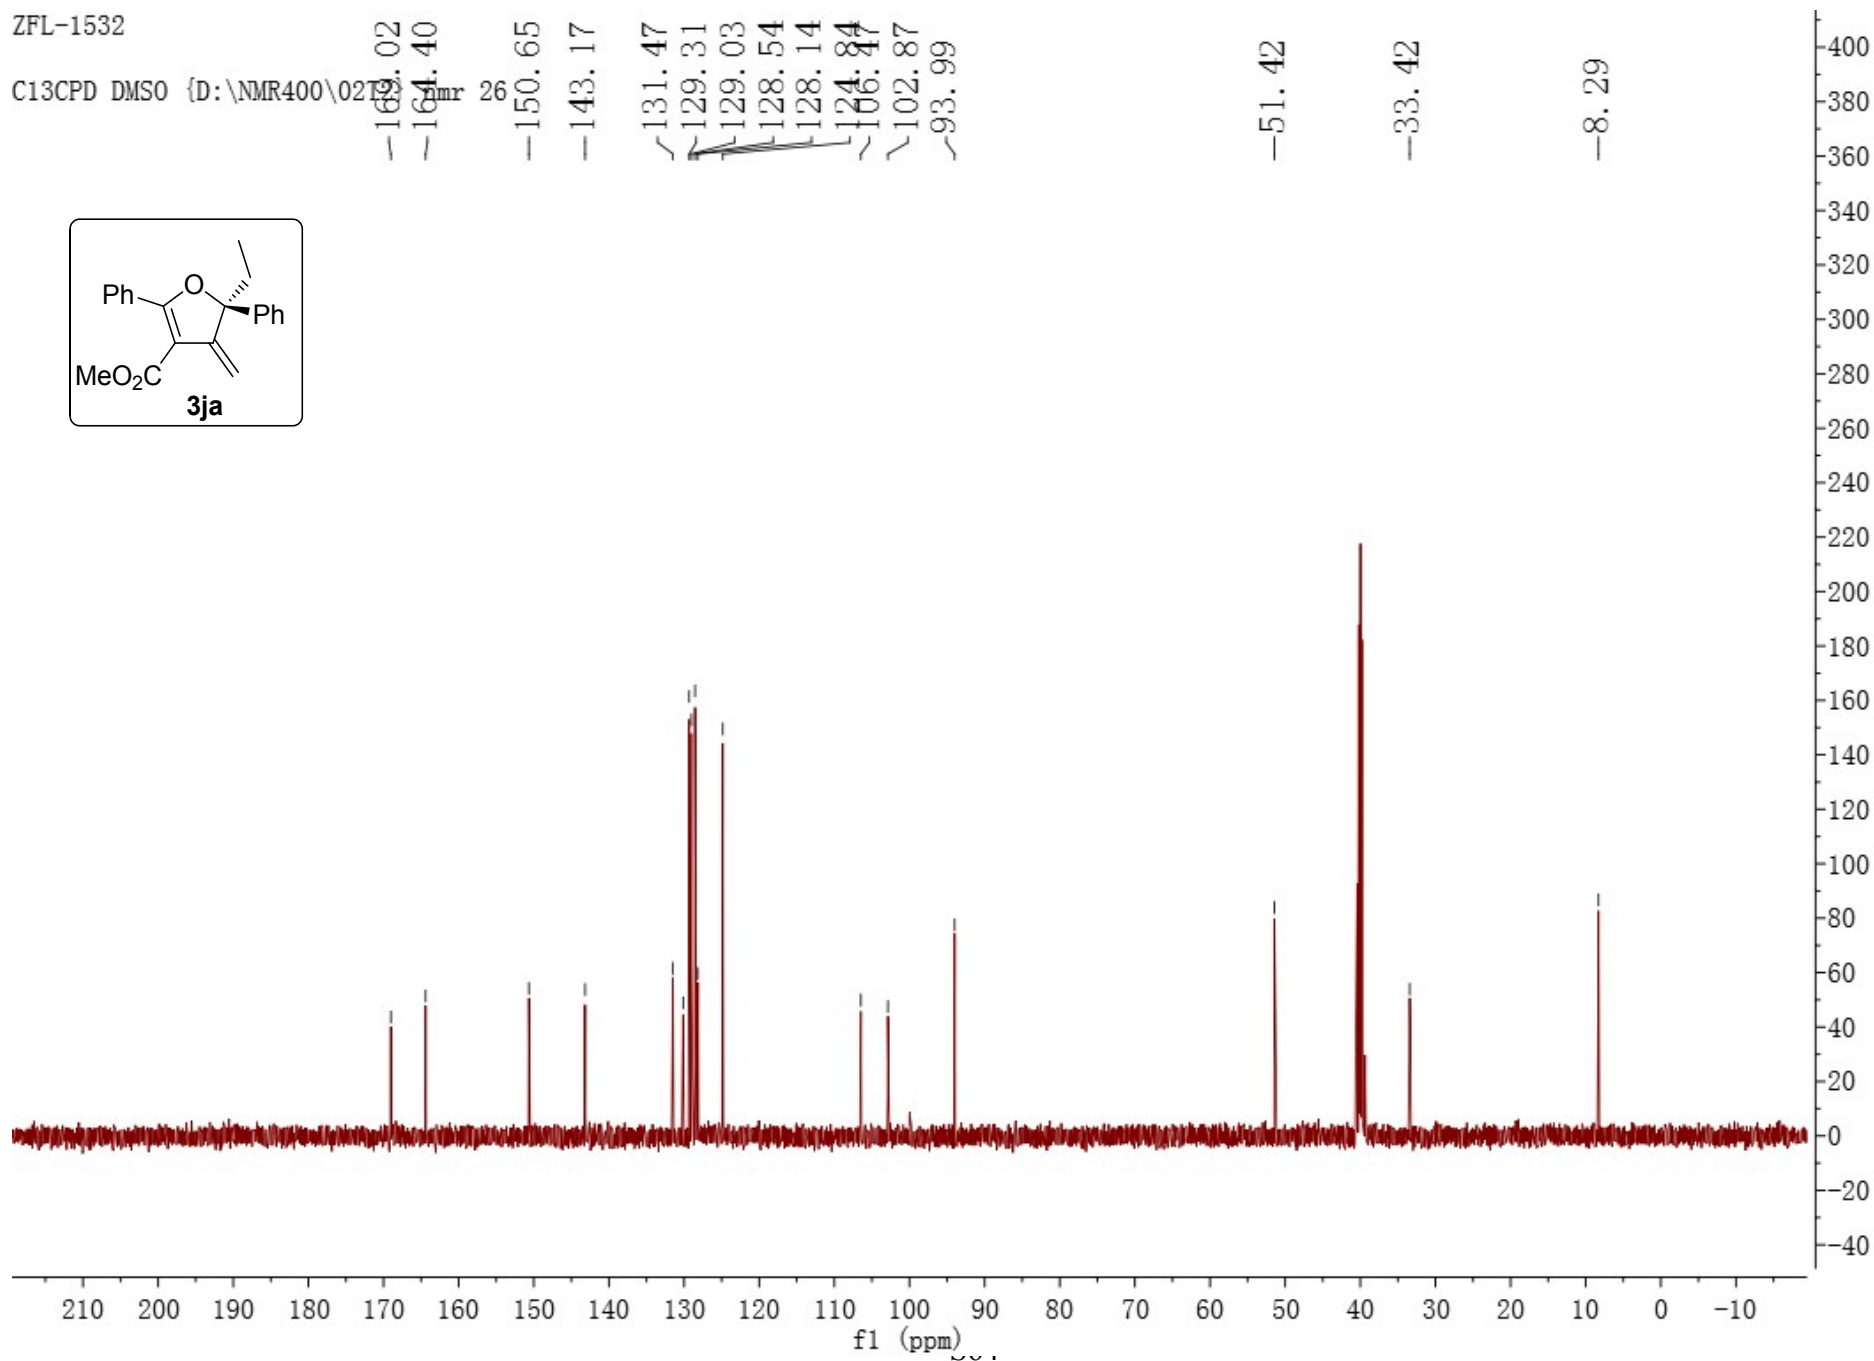

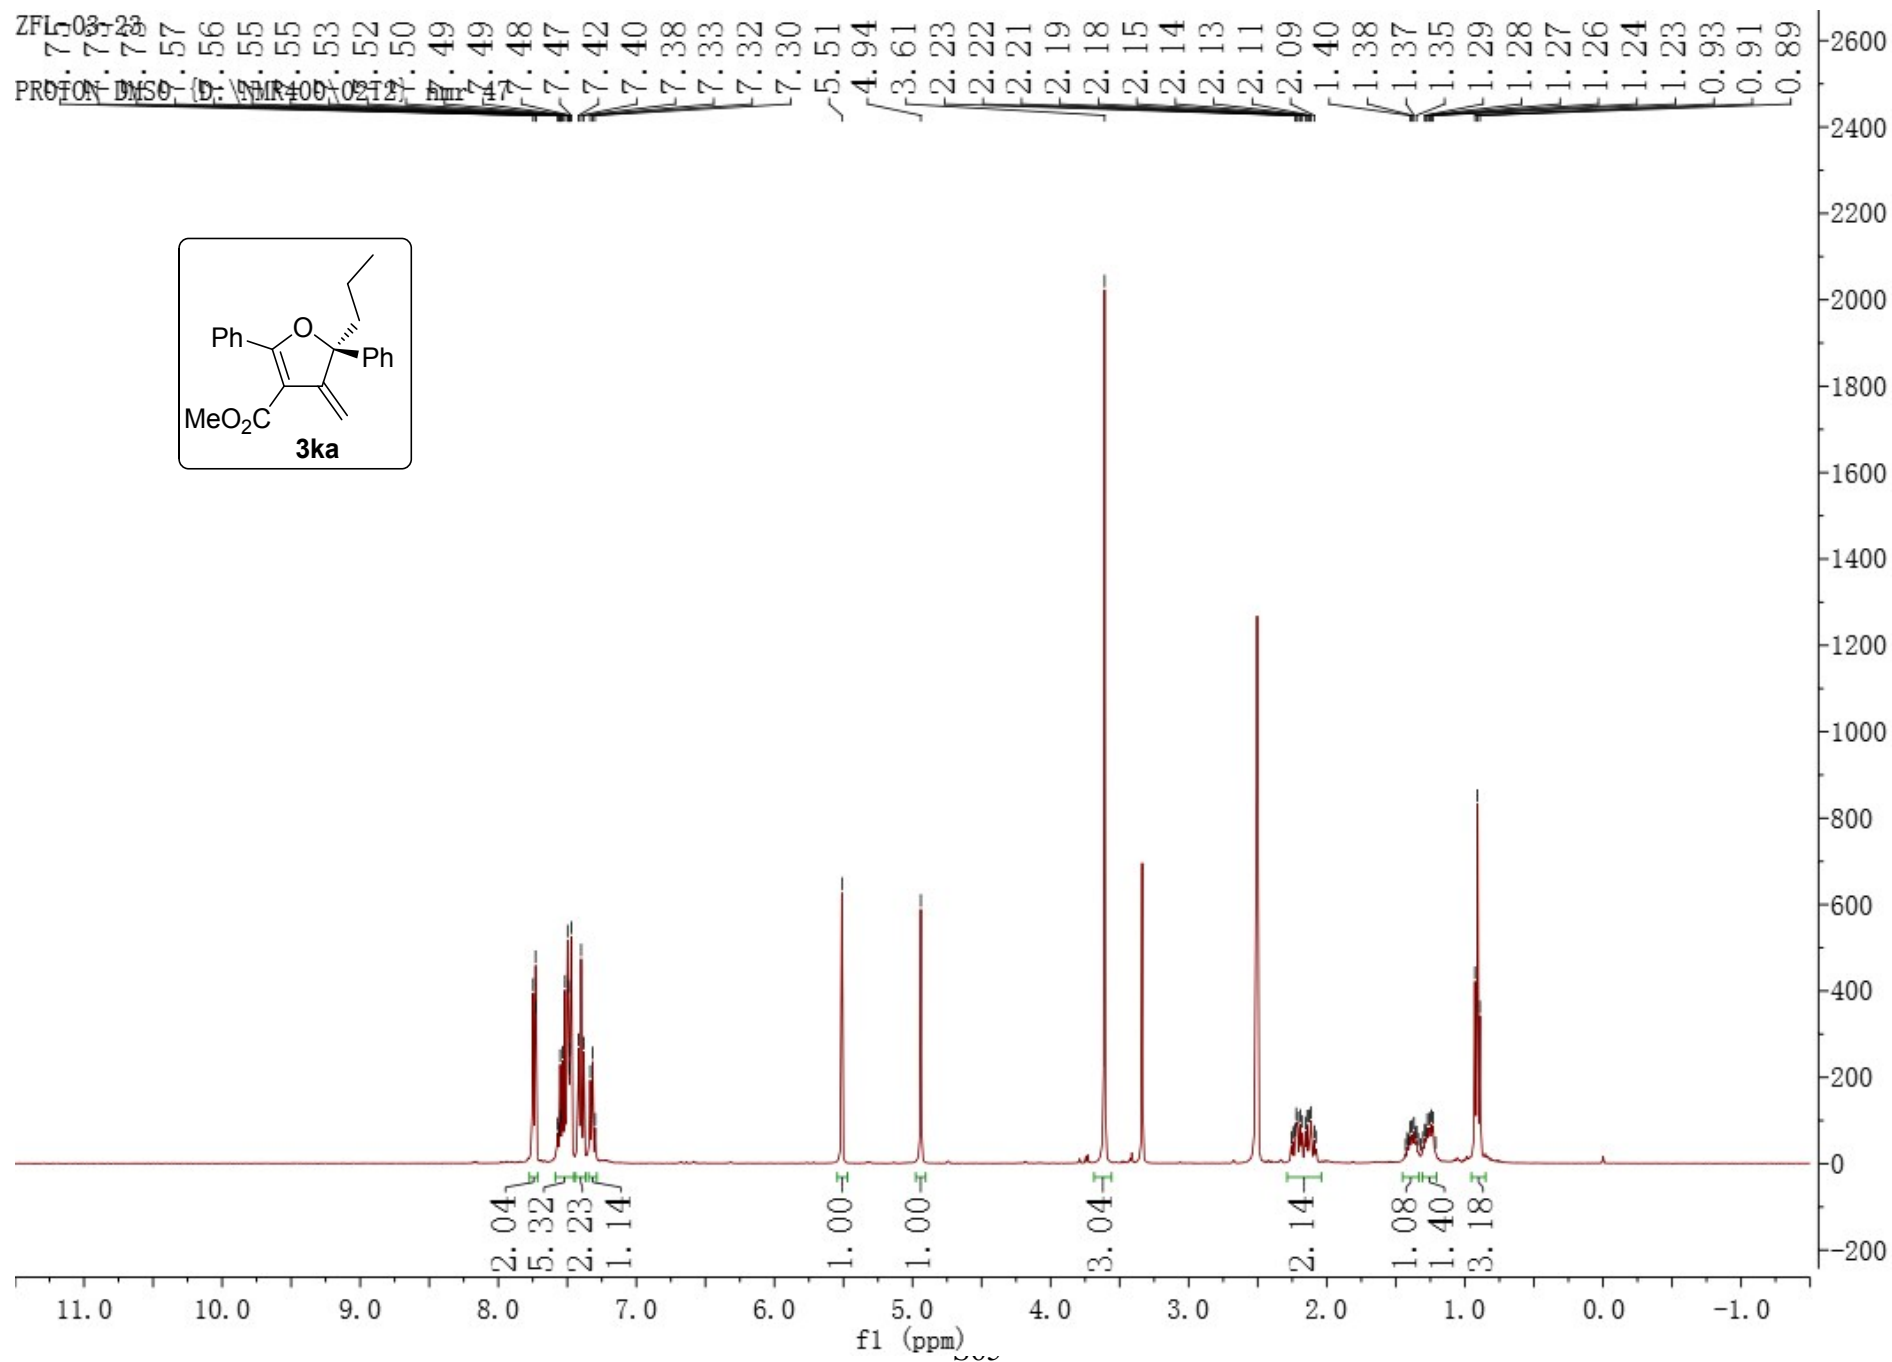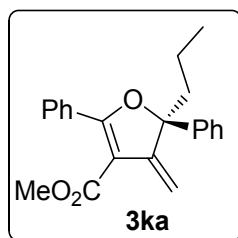

ZFL-1800

C13CPD DMSO {D:\NMR400\02199

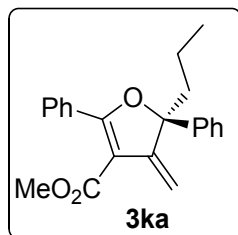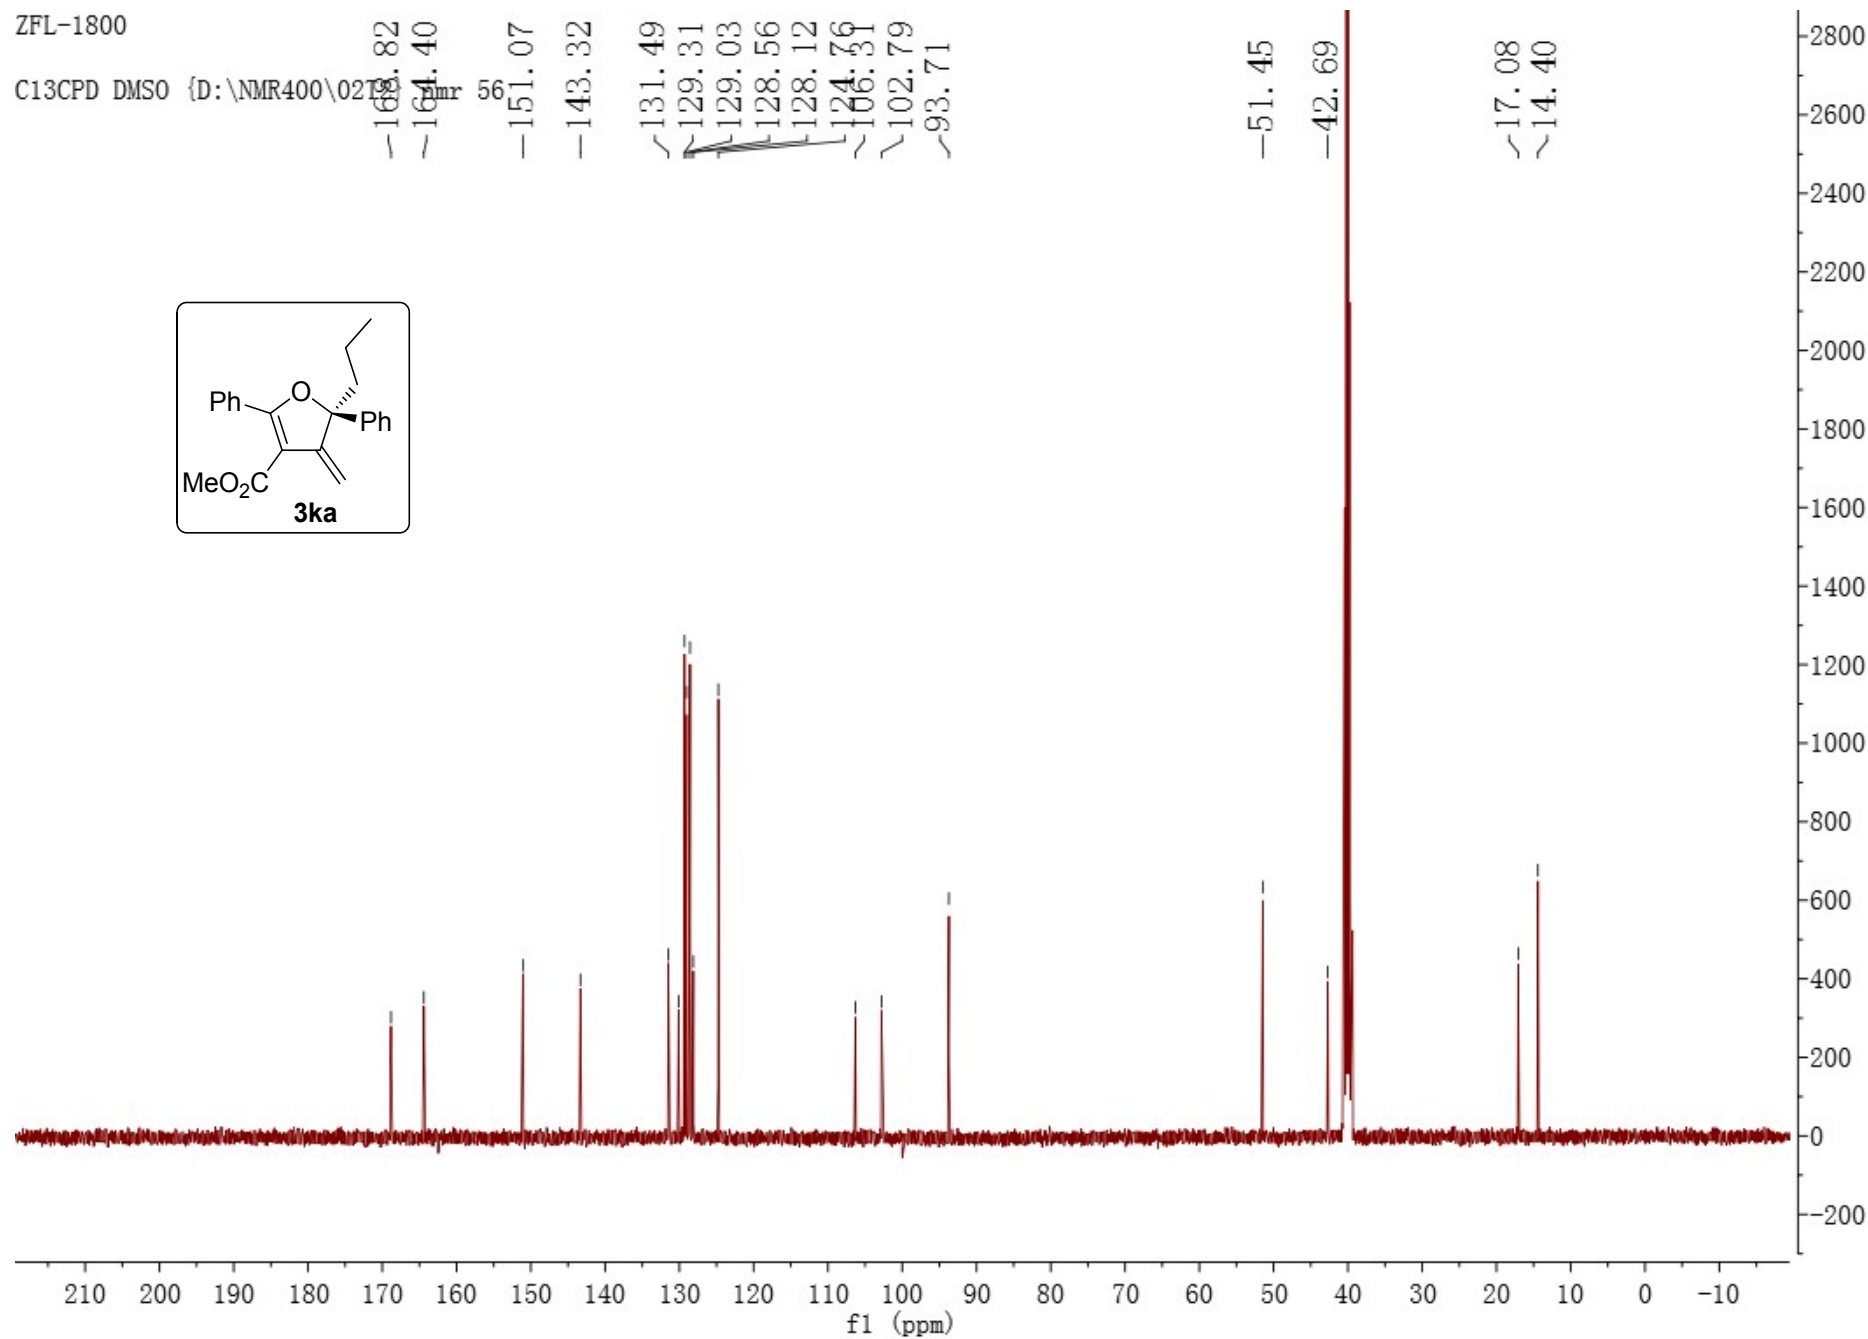

S66



LK-823

PROTON DMSO {D:\NMR400\02T2} nmr 43

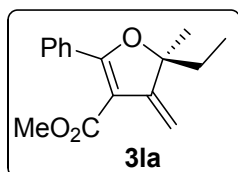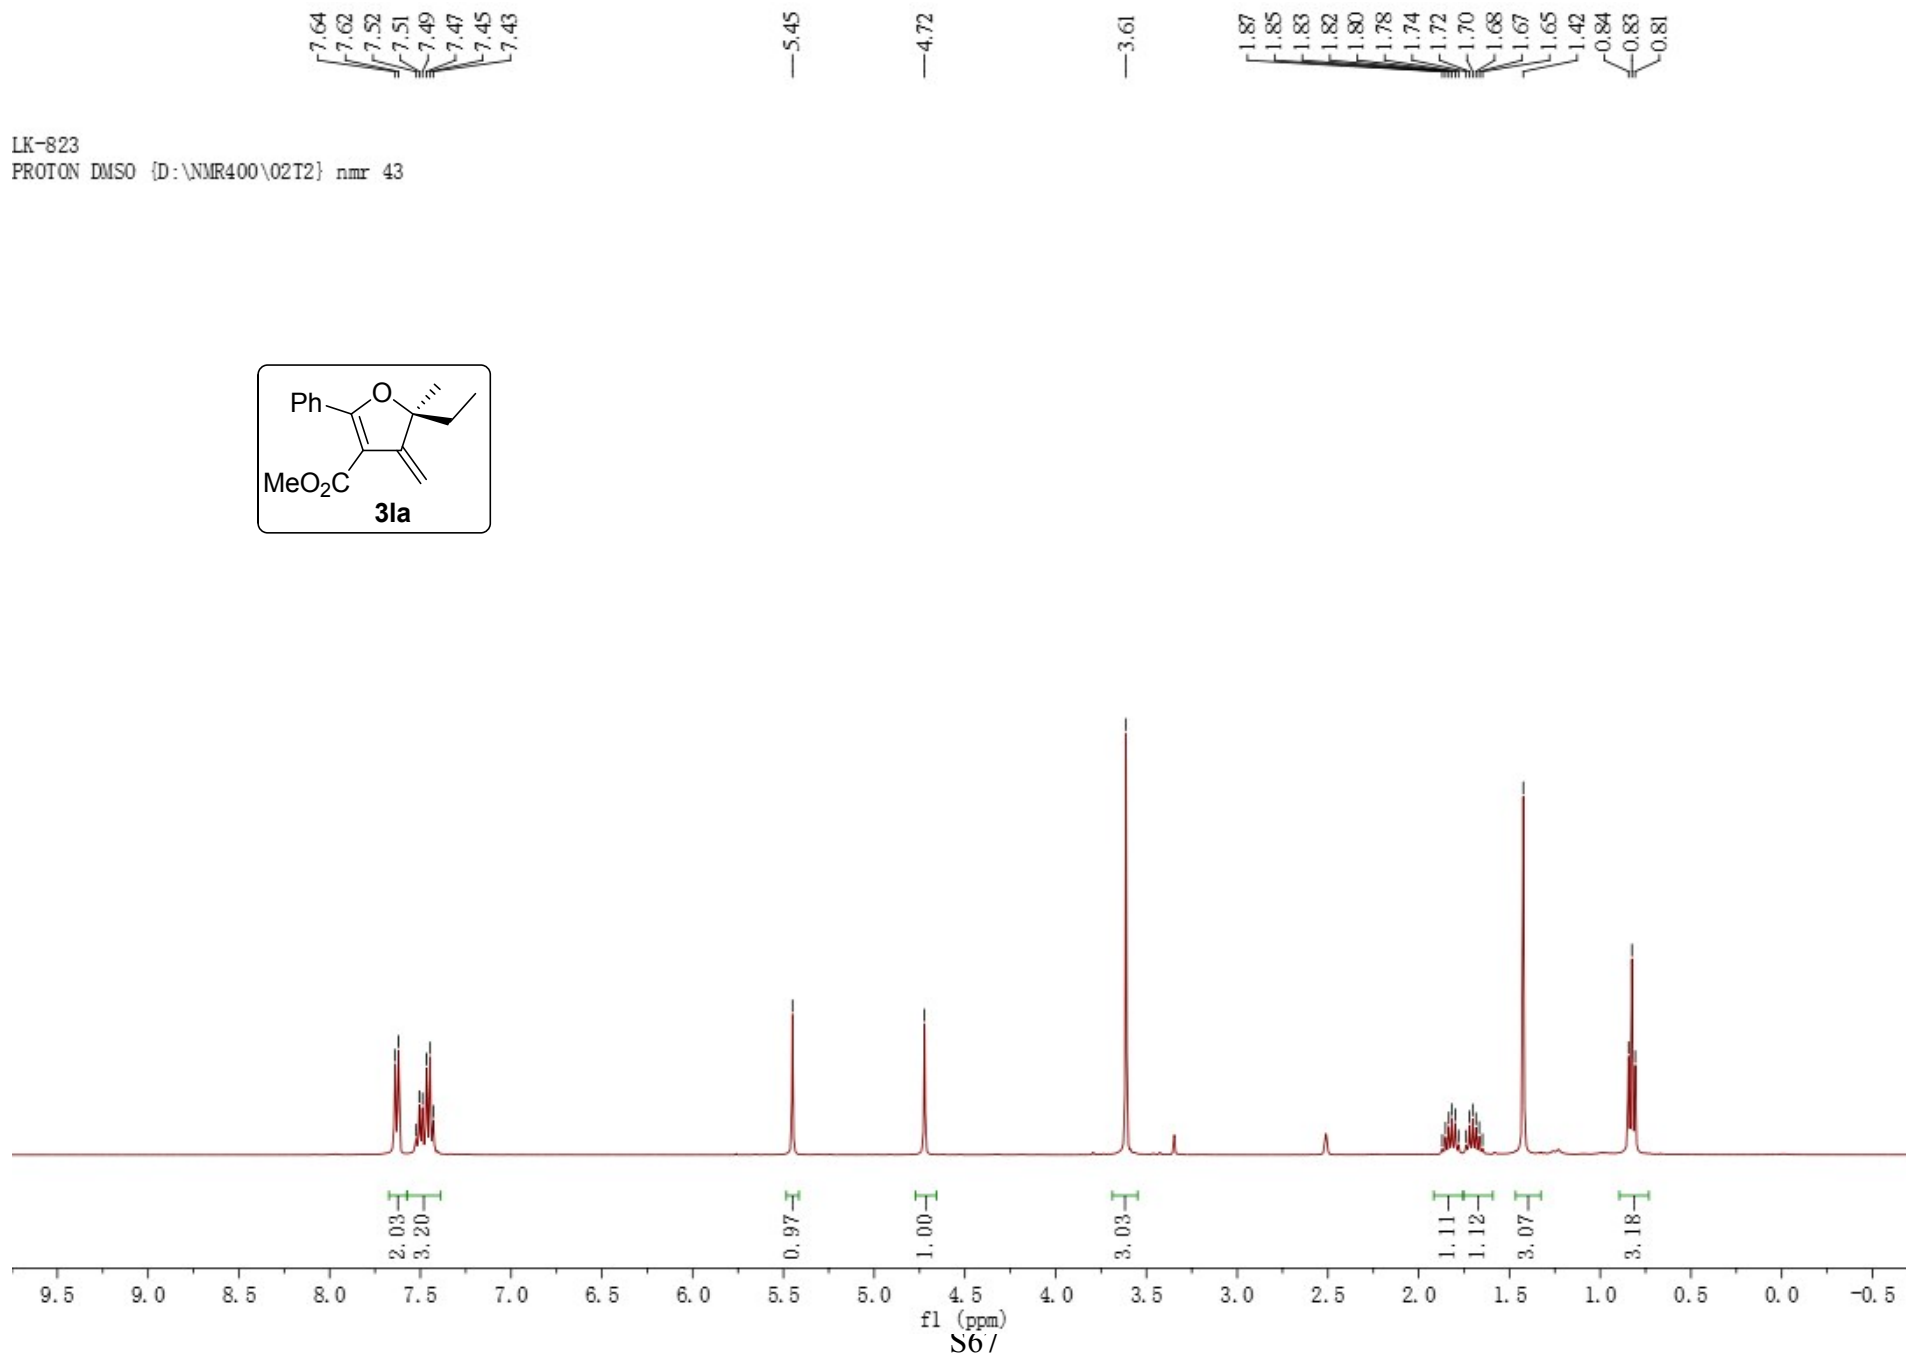

LK-823

C13CPD DMSO {D:\NMR400\02T2} nmr 43

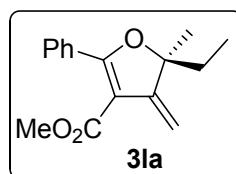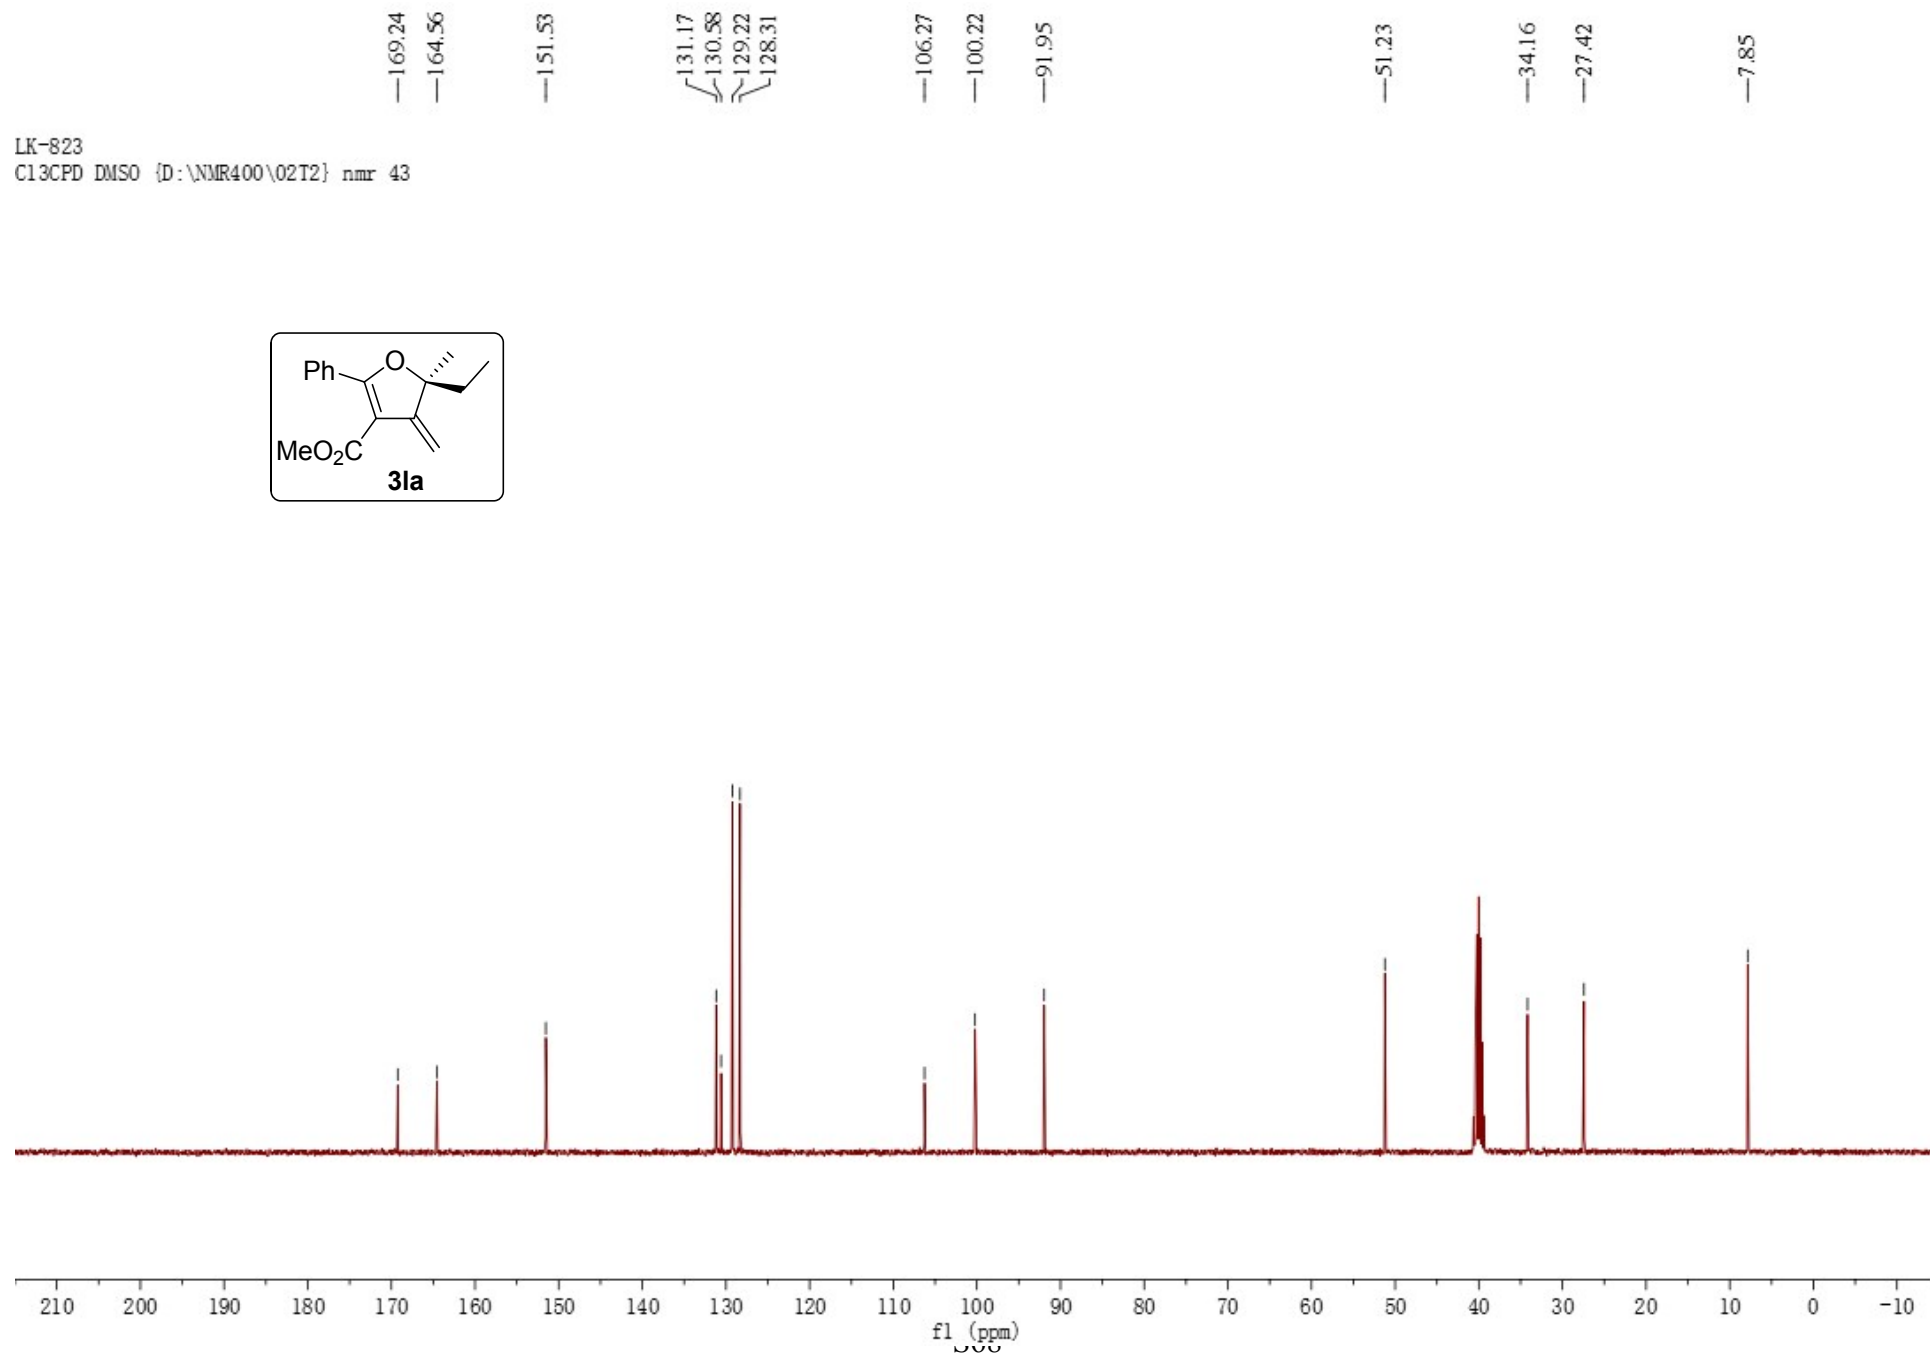

ZFL-1750

PROTON CDC13 {D:\NMR400\92122}

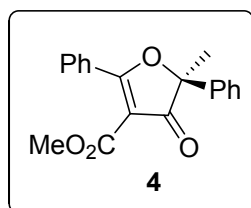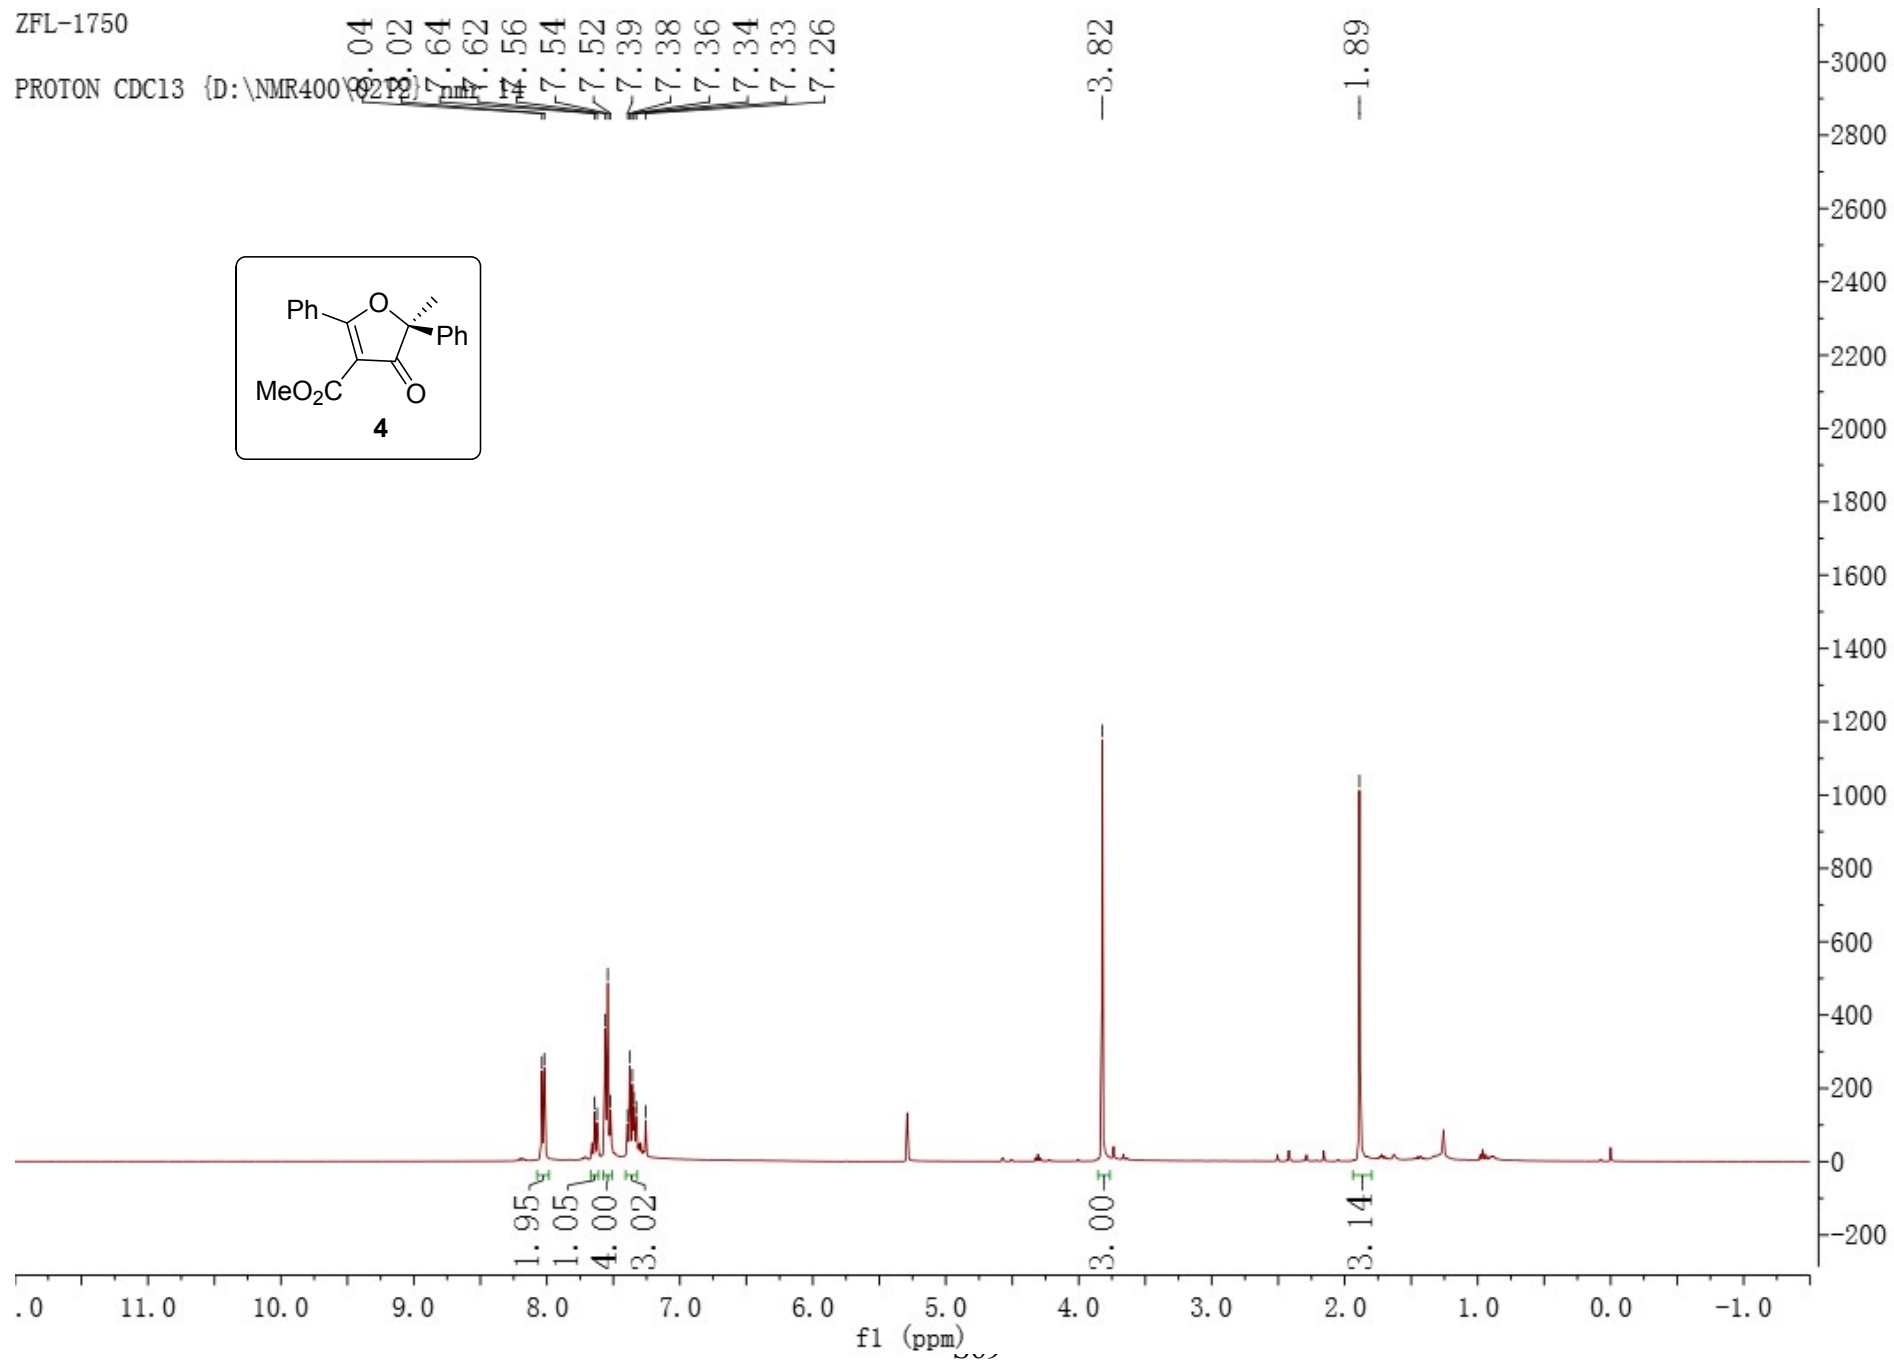

ZFL-1750

C13CPD CDC (DMSO-d6)

199.97

187.55

163.26

137.40

133.48

129.51

128.84

128.73

128.52

128.43

124.55

106.43

90.68

51.99

24.79

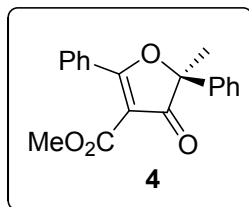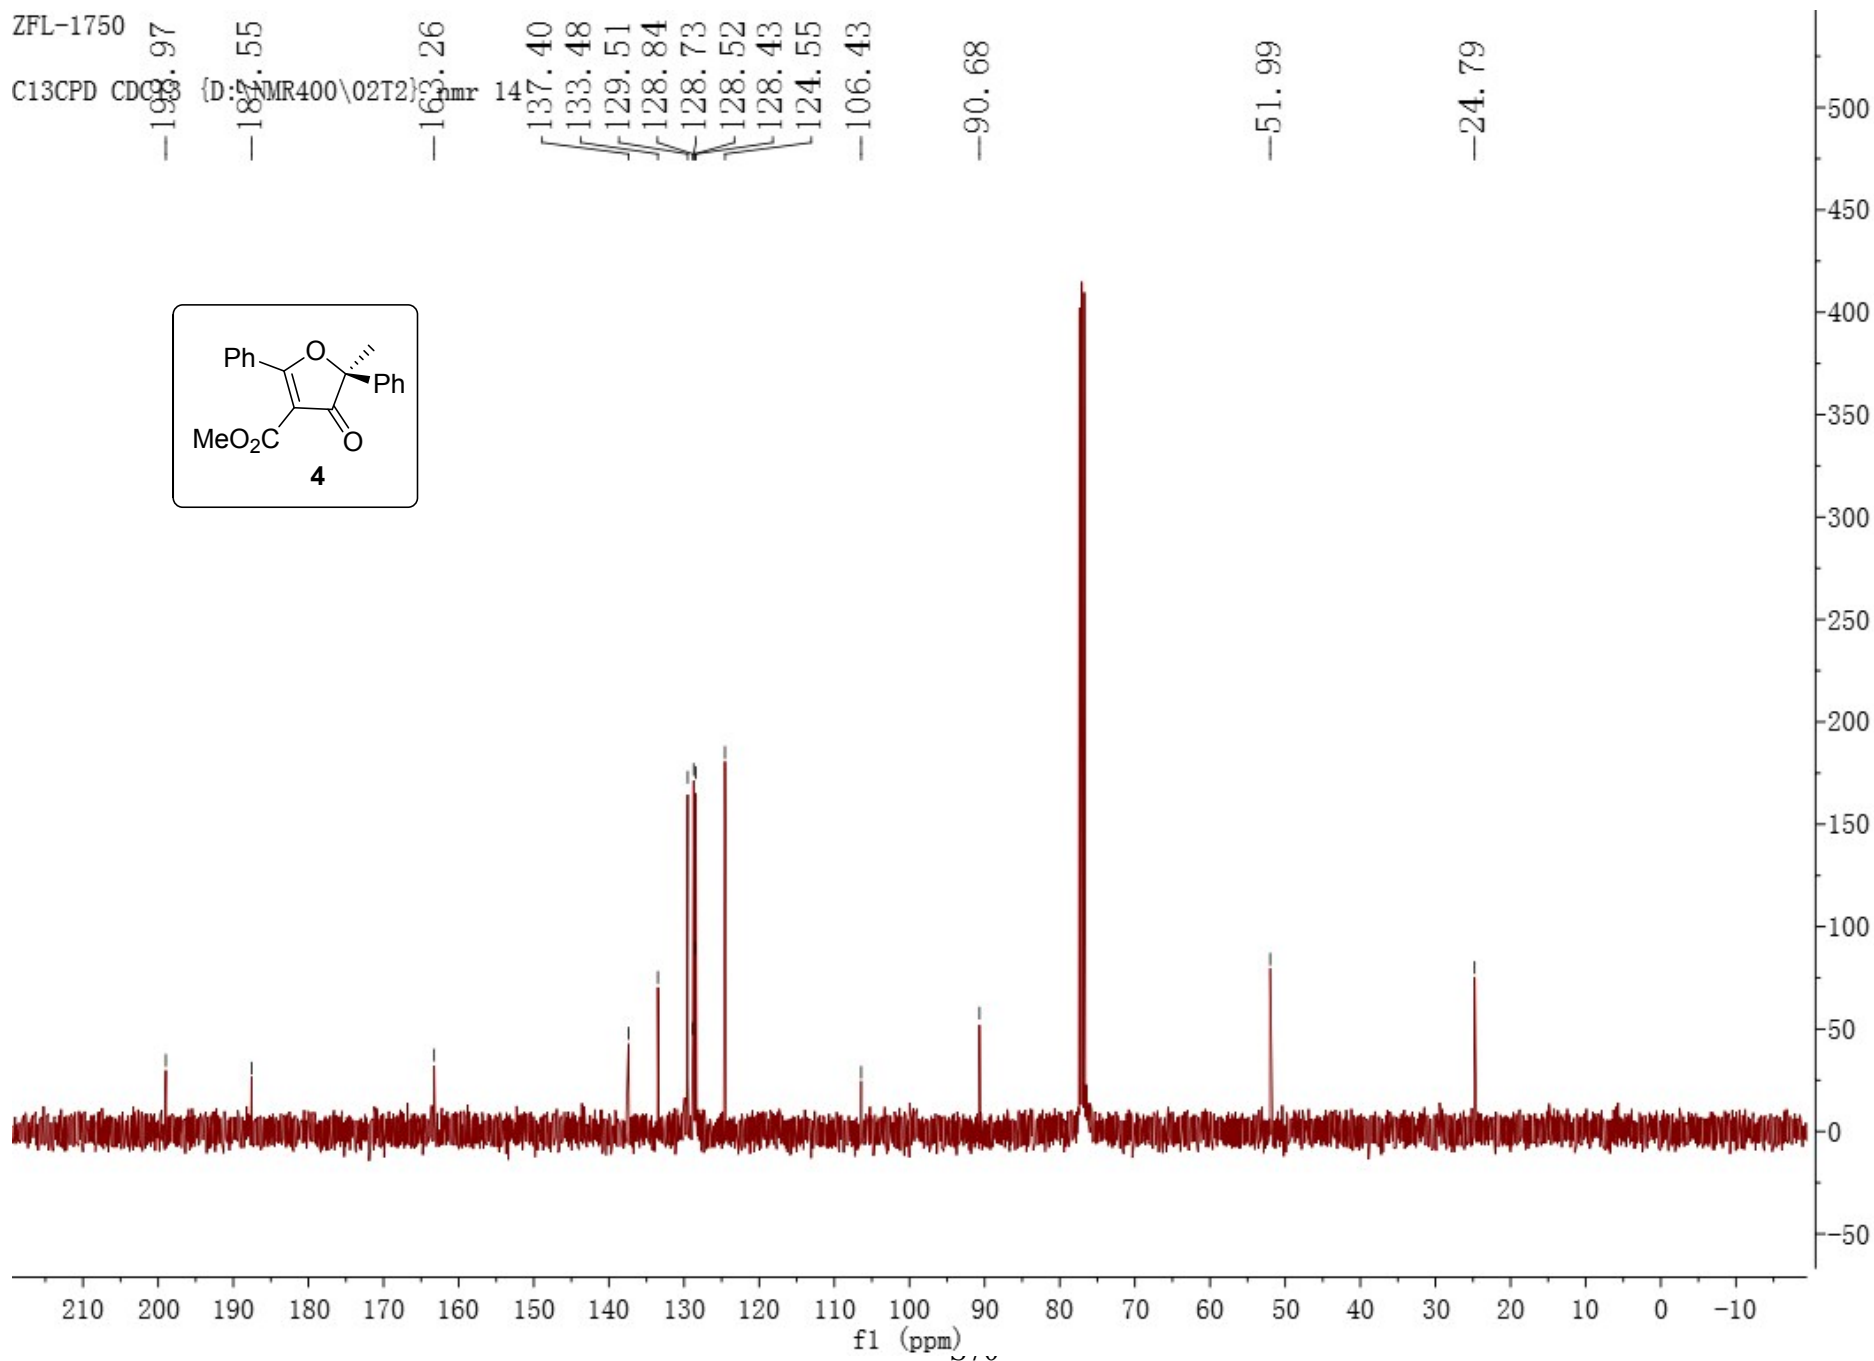

Supplement: c7ob02778h1.pdf [file c7ob02778h1.pdf]
